# Supplementary material for: The Acetylene Bridge in Intramolecular Singlet Fission: A Boon or A Nuisance?
Source: PubMed Central journal article supplement (PMC11656137; doi:10.1002/anie.202408615), 2024-11-18
Supplement: ANIE-63-e202408615-s001.pdf [file ANIE-63-e202408615-s001.pdf]

Supporting Information

**The Acetylene Bridge in Intramolecular Singlet Fission: A Boon or A Nuisance?**

*K. Majumder, S. Mukherjee, J. Park, W. Kim\*, A. J. Musser\*, S. Patil\**

*Supporting Information:*

**The Acetylene Bridge in Singlet Fission: A Boon or A Nuisance?**

Kanad Majumder<sup>1</sup>, Soham Mukherjee<sup>2</sup>, Jungjin Park<sup>3</sup>, Woojae Kim<sup>3,\*</sup>, Andrew J. Musser<sup>2,\*</sup>, Satish Patil<sup>1,\*</sup>

<sup>1</sup>Solid State and Structural Chemistry Unit, Indian Institute of Science, Bangalore 560012, India

<sup>2</sup>Department of Chemistry and Chemical Biology, Cornell University, Ithaca, New York 14853, USA

<sup>3</sup>Department of Chemistry, Yonsei University, Seoul 03722, Republic of Korea

Correspondence to: [woojae@yonsei.ac.kr](mailto:woojae@yonsei.ac.kr), [ajm557@cornell.edu](mailto:ajm557@cornell.edu), [spatil@iisc.ac.in](mailto:spatil@iisc.ac.in)

# Table of Contents

|                                                                              |           |
|------------------------------------------------------------------------------|-----------|
| <b>1. General Materials and Methods.....</b>                                 | <b>4</b>  |
| <b>2. Synthesis and Spectroscopic Characterization of Compounds.....</b>     | <b>6</b>  |
| 2.1. General Synthetic Procedure for Synthesis of 2,2' Pentacene Dimers..... | 7         |
| 2.1.1. Synthesis of 2,2' Pentacene Dimers (2Ac-P2Ph and 2Ac-P2BP).....       | 7         |
| 2.1.2. Synthesis of 2,2' Pentacene Dimer (2Ac-P2).....                       | 8         |
| 2.1.3. Synthesis of 2,2' Pentacene Dimers (2-P2Ph and 2-P2BP).....           | 9         |
| 2.1.4. Synthesis of 2,2' Pentacene Dimer (2-P2).....                         | 10        |
| 2.2. Synthesis of Pentacene Precursor for 2,2'-linked Pentacene Dimers.....  | 11        |
| 2.3. Synthesis of Diethynyl derivative of Oligo-(phenylene) Linkers .....    | 15        |
| 2.4. General Synthetic Procedure for Synthesis of 6,6' Pentacene Dimers..... | 16        |
| <b>3. Computational Methods.....</b>                                         | <b>23</b> |
| 3.1. Structural Parameters.....                                              | 24        |
| 3.2. Energy level splitting.....                                             | 27        |
| 3.3. Ground State Optimised Geometries.....                                  | 36        |
| 3.4. Triplet Spin Density.....                                               | 38        |
| <b>4. Supporting Figures.....</b>                                            | <b>43</b> |
| 4.1. Steady State Measurements.....                                          | 43        |

|                                                                           |    |
|---------------------------------------------------------------------------|----|
| 4.2. Transient Absorption Measurements.....                               | 45 |
| 5. $^1\text{H}$ , $^{13}\text{C}$ NMR Spectra and MALDI of Compounds..... | 63 |
| 6. References.....                                                        | 99 |

## 1. General Materials and Methods:

### Materials.

All solvents were dried by standard methods. Chemicals were purchased from Aldrich, Acros Organics, S.D. fine chemicals, B.L.D. Pharm, T.C.I. India and Spectrochem and used without further purification. Compound 3a-h were synthesized via reported procedures as described later. THF was distilled from sodium/benzophenone ketyl. Anhydrous Na<sub>2</sub>SO<sub>4</sub> was used as the drying agent after aqueous work-up. Evaporation and concentration in vacuo was done at water aspirator pressure. All reactions were performed in standard, dry glassware under an inert atmosphere of nitrogen or argon. Column chromatography: silica gel-60 (230–400 mesh). Thin Layer Chromatography (TLC): pre-coated plastic sheets covered with 0.20 mm silica gel with fluorescent indicator UV 254 nm; visualization by UV light. Detailed synthesis procedures are provided in Supplementary Information Section 2.

### Sample Characterisation and Steady-state Optical Characterization.

The <sup>1</sup>H spectra were taken in ECX500 - Jeol 500 MHz High Resolution Multinuclear FT-NMR Spectrometer at 500 MHz frequency. The chemical shifts were reported as δ values (ppm) relative to TMS. Also, <sup>13</sup>C were recorded on the same instrument at 125 MHz frequency. All sample were dissolved in CDCl<sub>3</sub> / d<sub>6</sub>-DMSO solvent. MALDI-MS were recorded on a Bruker daltonics Autoflex Speed system using α-Cyano-4- hydroxy-cinnamic acid (CCA) as a matrix.

The optical absorption spectra of the molecules in solution were recorded with PerkinElmer (Lambda-35) spectrometer at room temperature. Spectroscopic grade solvents were used for performing all the studies. High concentration stock solution was prepared in chlorobenzene and finally diluted to 10 μM (10 x 10<sup>-6</sup> M) concentration to perform all the steady state experiments.

Density Functional Theory Calculations were done with Gaussian 16 Program.<sup>[1]</sup> The geometry optimization and potential energy curve scan calculations were performed using CAM-B3LYP functional<sup>[2]</sup> with 6-31g(d) basis set.<sup>[3]</sup>

## Transient Absorption Spectroscopy.

Femtosecond transient absorption measurements were performed with an automated transient absorption spectrometer (HELIOS, Ultrafast Systems), driven by the Yb:KGW amplifier (PHAROS-SP, Light Conversion) operating at 8 kHz. The OPA and SH module (ORPHEUS and LYRA-SH, Light Conversion) generate a 180-fs narrowband pump pulse. A portion of the fundamental was separated to generate a white light continuum probe pulse ranging from 450 nm to 1600 nm using 1 cm sapphire (VIS, 450-915 nm) and YAG (NIR, 1120-1630 nm) crystal. For UV probe ranging from 350 nm to 510 nm, the frequency doubled 515 nm was used. The beam diameters ( $1/e^2$  height) for pump and probe pulses at the sample position were 650 and 140  $\mu\text{m}$ , respectively. TA spectra were collected with magic angle condition between pump and probe and in a shot-to-shot fashion. Pump-probe time delay was set by a mechanical delay stage from -3 to 7600 ps. A 2 mm path length cuvette (Hellma, HL110-2-40) was used. A magnetic stirrer (Ultrafast Systems) was used to prevent photodegradation of the sample. The nanosecond TA experiments were conducted by an automated TA spectrometer (EOS, Ultrafast Systems) with a combination of two independent lasers: a Yb:KGW amplifier (Pharos-SP-1.5 mJ, Light Conversion) with a 1 kHz repetition rate and a supercontinuum laser (LEUKOS) with a 2 kHz repetition rate. Pump pulses were generated through a commercial collinear optical parametric amplifier and its second harmonic module (ORPHEUS and LYRA, Light Conversion). Time delays were electronically controlled. A quartz cell with a 2 mm path length (21/Q/2, Starna) was employed with the sample concentration of  $c = \sim 10^{-5}$  M. The samples were prepared inside a glovebox (0.0 ppm  $\text{O}_2$  level) with fresh anhydrous solvents and sealed with Teflon tape and parafilm. After every experiment, the steady-state absorption was carefully checked, and we confirmed that there was no degradation of the sample.

## 2. Synthetic and Spectroscopic Characterisation of Compounds

### a) Synthesis of 2,2'-linked Pentacene Dimers (**2Ac-P**):

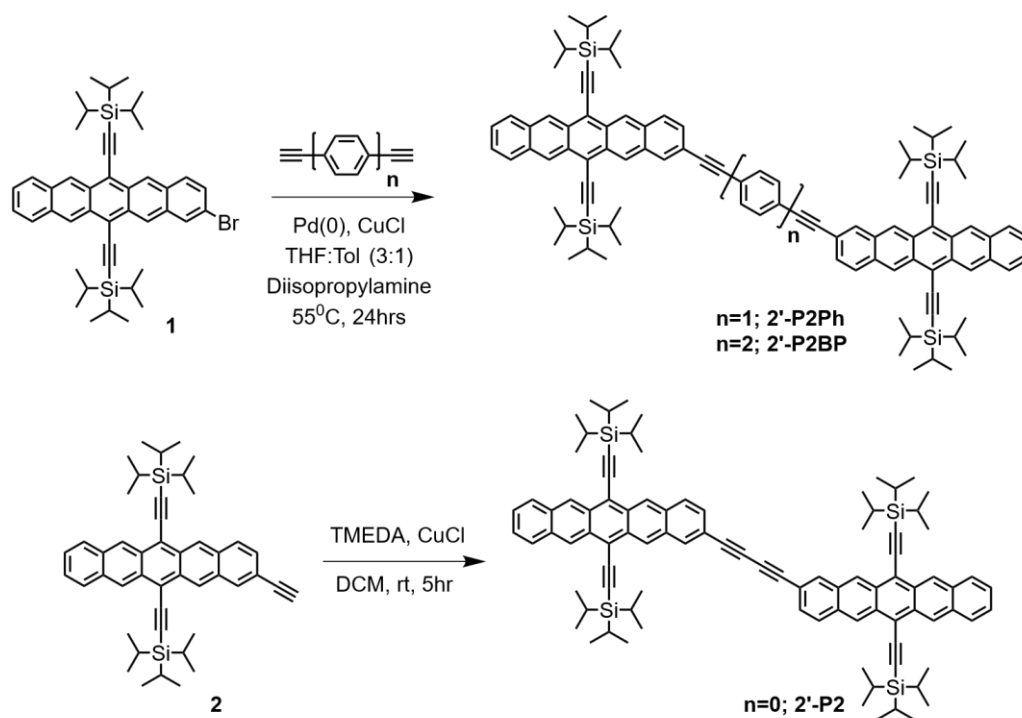

### b) Synthesis of 2,2'-linked Pentacene Dimers (**2-P**):

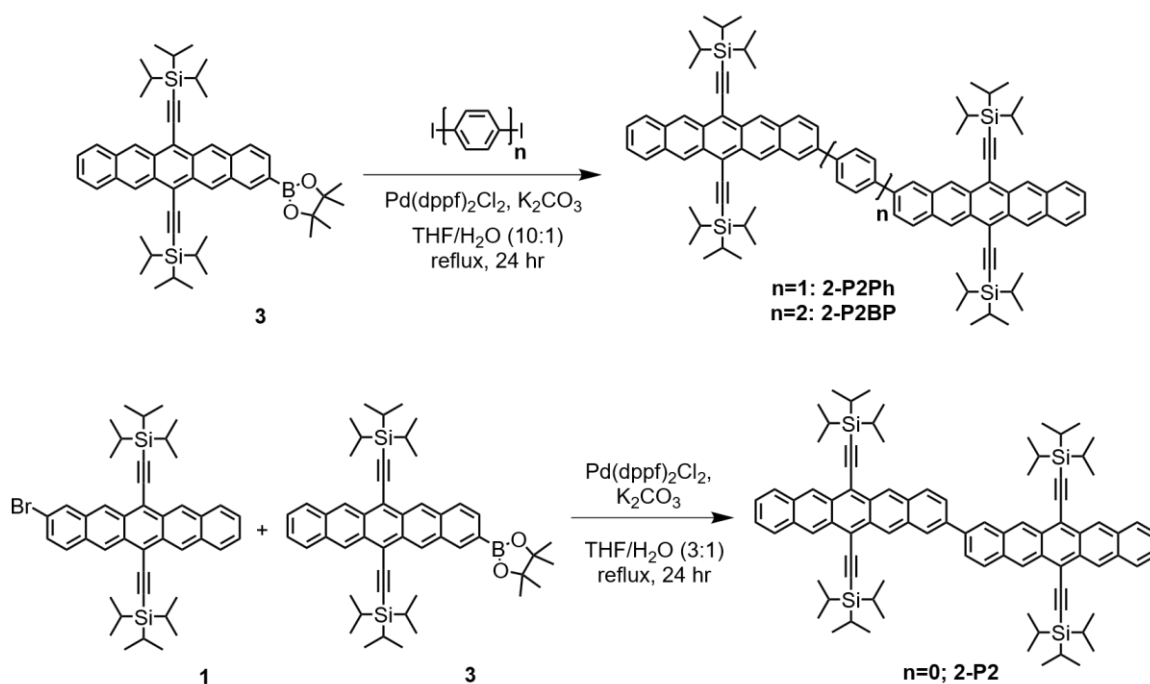

**Figure S2.1.** Synthesis of 2,2'-linked pentacene dimers

## 2.1. General Synthetic Procedure for Synthesis of 2,2' Pentacene Dimers

The targeted molecules **2Ac-P** were synthesized via carbon-carbon Sonogashira and carbon-carbon homocoupling. The targeted molecules **2-P** were synthesized according to the known procedure as described in the literature.<sup>[4]</sup> The synthetic route and the molecular structures are illustrated in Scheme S2.1. Intermediates and final compounds were purified by silica gel chromatography; structures and purity were confirmed by <sup>1</sup>H, <sup>13</sup>C and MALDI-TOF.

### 2.1.1. Synthesis of 2,2' Pentacene Dimers (2Ac-P2Ph and 2Ac-P2BP):

To a solution of **1** (0.300 g, 0.42 mmol, 2 equiv) and diethynyl derivative of the oligophenylene linker, **5b** (0.21 mmol, 1 equiv) in dry THF and toluene mixture (3:1, 15mL) and diisopropylamine (5.0 mL, 3.6 g, 36 mmol) which had been deoxygenated for 10 min with argon was added Pd(PPh<sub>3</sub>)<sub>4</sub> (0.025 g, 0.0216 mmol) and CuCl (0.008 g, 0.08 mmol). The reaction mixture was further deoxygenated with argon for an additional 2 min. The reaction mixture was stirred for 24 h at 55 °C, cooled to rt, and poured into satd. aq. NH<sub>4</sub>Cl (100 mL). H<sub>2</sub>O (150 mL) was added, and the mixture was extracted with CH<sub>2</sub>Cl<sub>2</sub> (80 mL, 50 mL). The organic phase was washed with 5% NH<sub>4</sub>Cl (200 mL), dried (Na<sub>2</sub>SO<sub>4</sub>), filtered, and the solvent removed in vacuo. Column chromatography (silica gel, hexanes/chloroform) afforded the product (yield 55-65%) as a blue-green solid.

### Spectroscopic Characterisation of 2Ac-P2Ph:

Yield: 0.208 g (71%). The product has low solubility, thus <sup>1</sup>H and <sup>13</sup>C NMR spectroscopy have poorly defined signals. <sup>1</sup>H NMR (500 MHz, CDCl<sub>3</sub>): δ 9.30-9.28 (br, m, 4H), 9.26-9.24 (br, 4H), 8.16 (s, 2H), 7.98-7.95 (m, 4H), 7.95-7.92 (d, 2H), 7.64 (s, 4H), 7.46-7.43 (d, 2H), 7.43-7.40 (m, 4H), 1.41-1.35 (m, 84H). <sup>13</sup>C NMR (125 MHz, CDCl<sub>3</sub>): δ 132.62, 132.50, 131.91, 131.84, 131.74, 131.64, 131.52, 131.17, 131.04, 130.98, 130.86, 130.82, 129.04, 128.88, 128.77, 128.72, 128.65, 128.04, 126.79, 126.72, 126.66, 126.55, 126.49, 126.48, 126.27, 123.29, 120.46, 118.73, 118.65, 107.72, 107.47, 104.54, 92.43, 91.10, 19.10, 11.75. MALDI-MS m/z calcd. for C<sub>98</sub>H<sub>110</sub>Si<sub>4</sub> (M<sup>+</sup>) 1398.768, found 1398.222.



### Spectroscopic Characterisation of 2Ac-P2BP:

Yield: 0.238g (77%). The product has low solubility, thus  $^1\text{H}$  and  $^{13}\text{C}$  NMR spectroscopy have poorly defined signals.  $^1\text{H}$  NMR (500 MHz,  $\text{CDCl}_3$ ):  $\delta$  9.31-9.28 (br, m, 4H), 9.27-9.23 (br, 4H), 8.16 (s, 2H), 7.98-7.95 (m, 4H), 7.95-7.92 (d, 2H), 7.72-7.66 (m, 6H), 7.63-7.60 (m, 2H), 7.48-7.45 (d, 2H), 7.43-7.40 (m, 4H), 1.41-1.35 (m, 84H).  $^{13}\text{C}$  NMR (125 MHz,  $\text{CDCl}_3$ ):  $\delta$  140.26, 133.16, 132.48, 132.37, 131.68, 131.17, 131.01, 130.98, 130.87, 130.81, 128.98, 128.77, 128.68, 128.16, 127.05, 126.90, 126.63, 126.26, 122.67, 122.61, 120.65, 120.59, 118.70, 118.63, 107.67, 107.44, 104.57, 91.42, 91.22, 19.13, 11.76. MALDI-MS  $m/z$  calcd. for  $\text{C}_{104}\text{H}_{114}\text{Si}_4$  ( $\text{M}^+$ ) 1474.799, found 1474.310.

### 2.1.2. Synthesis of 2,2' Pentacene Dimer (2Ac-P2):

To a suspension of CuCl (0.040 g, 0.40 mmol) in TMEDA (1.1 mL, 0.85 g, 7.3 mmol) was added dry  $\text{CH}_2\text{Cl}_2$  (10 mL). This suspension was oxygenated by bubbling  $\text{O}_2$  for approx. 2 min. To this mixture was added a solution of **2** (0.250 g, 0.377 mmol) in dry  $\text{CH}_2\text{Cl}_2$  (3 mL). The reaction mixture was allowed to stir 4 h at rt open to the atmosphere and then poured into satd. aq.  $\text{NH}_4\text{Cl}$  (200 mL). The mixture was extracted with  $\text{CH}_2\text{Cl}_2$  (2  $\times$  50 mL). The combined organic phase was washed with  $\text{H}_2\text{O}$  (200 mL, 150 mL), satd. aq. NaCl (150 mL), dried ( $\text{Na}_2\text{SO}_4$ ), and the solvent removed in vacuo. Column chromatography (silica gel, 4:1  $\text{CH}_2\text{Cl}_2$ /hexanes) afforded the product (0.119 g, 55%) as a purplish-blue solid.

### Spectroscopic Characterisation of 2Ac-P2:

Yield: 0.140g (56%). The product has low solubility, thus  $^1\text{H}$  and  $^{13}\text{C}$  NMR spectroscopy have poorly defined signals.  $^1\text{H}$  NMR (500 MHz,  $\text{CDCl}_3$ ):  $\delta$  9.31-9.28 (br, m, 4H), 9.26-9.24 (br, 4H), 8.24 (s, 2H), 7.98-7.95 (m, 4H), 7.94-7.91 (d, 2H), 7.43-7.39 (m, 6H), 1.38-1.35 (m, 84H).  $^{13}\text{C}$  NMR (125 MHz,  $\text{CDCl}_3$ ):  $\delta$  134.72, 132.58, 132.53, 131.34, 131.16, 131.14, 130.97, 130.90, 130.85, 129.21, 128.79, 128.77, 127.58, 127.08, 126.67, 126.54, 126.49, 126.37, 126.33, 119.17, 118.96, 118.69, 107.95, 107.61, 104.44, 83.74, 75.97, 19.12, 19.09, 11.75, 11.74. MALDI-MS  $m/z$  calcd. for  $\text{C}_{92}\text{H}_{105}\text{Si}_4$  ( $[\text{M}-\text{H}]^+$ ) 1321.729, found 1321.648.

### 2.1.3. Synthesis of 2,2' Pentacene Dimers (2-P2Ph and 2-P2BP):

Compound 1 was synthesized according to procedure reported in the literature.<sup>[4]</sup>

To a dry round bottomed flask was added **3** (0.400 g, 0.52 mmol, 2.2 equiv), diiodo derivative of the oligophenylene linker, (0.24 mmol, 1 equiv), K<sub>2</sub>CO<sub>3</sub> (0.52 mg, 17 equiv) and Pd(dppf)<sub>2</sub>Cl<sub>2</sub>.DCM (0.1 equiv). Sequential vacuum and argon were used to degas the mixture followed by the addition of degassed THF and H<sub>2</sub>O (10:1 ratio, 150 mL). The mixture was heated to reflux and maintained for 24 h in the dark. After the reaction, the mixture was cooled, and poured into satd. aq. NH<sub>4</sub>Cl (150 mL). H<sub>2</sub>O (100 mL) was added, and the mixture was extracted with CH<sub>2</sub>Cl<sub>2</sub> (100 mL, 50 mL). The organic phase was washed with 5% NH<sub>4</sub>Cl (200 mL), dried (Na<sub>2</sub>SO<sub>4</sub>), filtered and the solvent removed in vacuo. Column chromatography (silica gel, hexanes/chloroform) afforded the product (yield 55-65%) as a blue-green solid.

#### Spectroscopic Characterisation of 2-P2Ph:

Yield: 0.211 g (65%). The product has low solubility, thus <sup>1</sup>H and <sup>13</sup>C NMR spectroscopy have poorly defined signals. <sup>1</sup>H NMR (500 MHz, CDCl<sub>3</sub>): δ 9.37 (s, 2H), 9.34-9.29 (m, 6H), 8.23 (s, 2H), 8.10-8.07 (m, 2H), 7.99-7.95 (m, 8H), 7.82-7.78 (m, 2H), 7.43-7.39 (m, 4H), 1.41-1.35 (m, 84H). <sup>13</sup>C NMR (125 MHz, CDCl<sub>3</sub>): δ 137.80, 132.53, 132.44, 132.40, 131.60, 131.06, 130.89, 130.86, 130.73, 129.60, 128.78, 127.91, 127.83, 127.80, 127.79, 127.75, 127.70, 126.75, 126.51, 126.44, 126.31, 126.30, 126.21, 26.16, 126.07, 125.94, 125.91, 118.58, 118.39, 107.30, 104.78, 104.73, 19.12, 19.11, 11.78. MALDI-MS m/z calcd. for C<sub>94</sub>H<sub>110</sub>Si<sub>4</sub> (M<sup>+</sup>) 1350.768, found 1350.352.

#### Spectroscopic Characterisation of 2-P2BP:

Yield: 0.247 g (72%). The product has low solubility, thus <sup>1</sup>H NMR spectroscopy have poorly defined signals. <sup>13</sup>C NMR could not be obtained due to poor solubility. <sup>1</sup>H NMR (500 MHz, CDCl<sub>3</sub>): δ 9.36 (s, 2H), 9.33-9.28 (m, 6H), 8.21 (s, 2H), 8.10-8.05 (d, 2H), 7.98-7.91 (m, 8H), 7.89-7.86 (m, 4H), 7.79-

7.76 (d, 2H), 7.43-7.39 (m, 4H), 1.41-1.35 (m, 84H). MALDI-MS  $m/z$  calcd. for  $C_{100}H_{114}Si_4$  ( $M^+$ ) 1426.799, found 1426.377.

#### 2.1.4. Synthesis of 2,2' Pentacene Dimer (2-P2):

To a dry round bottomed flask was added **1** (0.15 g, 0.2 mmol), **3** (0.16 g, 0.2 mmol),  $Pd(dppf)_2Cl_2 \cdot DCM$  (0.015 g, 0.1 equiv), and  $K_2CO_3$  (500 mg, 3.6 mmol). Sequential vacuum and argon were used to degas the mixture followed by the addition of degassed  $H_2O$  (2 mL) and THF (6 mL). The resulting solution was heated to 70 °C and maintained for 24 h in dark. After the reaction, the solution was poured into satd. aq.  $NH_4Cl$  (150 mL).  $H_2O$  (100 mL) was added, and the mixture was extracted with  $CH_2Cl_2$  (100 mL, 50 mL). The organic phase was washed with 5%  $NH_4Cl$  (200 mL), dried ( $Na_2SO_4$ ), filtered and the solvent removed in vacuo. Column chromatography (silica gel, hexanes/DCM) afforded the product (yield 77%) as a blue-green solid.

#### Spectroscopic Characterisation of 2-P2:

Yield: 0.173 g (68%). The product has low solubility, thus  $^1H$  and  $^{13}C$  NMR spectroscopy have poorly defined signals.  $^1H$  NMR (500 MHz,  $CDCl_3$ ):  $\delta$  9.40 (s, 2H), 9.35-9.28 (m, 6H), 8.33 (s, 2H), 8.15-8.12 (d, 2H), 7.99-7.95 (m, 4H), 7.93-7.90 (d, 2H), 7.43-7.39 (m, 4H), 1.41-1.35 (m, 84H).  $^{13}C$  NMR (125 MHz,  $CDCl_3$ ):  $\delta$  137.79, 132.54, 132.52, 132.45, 132.43, 131.66, 131.13, 130.97, 130.86, 130.76, 129.73, 128.78, 126.92, 126.87, 126.45, 126.31, 126.26, 126.17, 126.07, 125.85, 118.61, 118.45, 107.46, 107.31, 104.80, 104.74, 19.11, 11.79. MALDI-MS  $m/z$  calcd. for  $C_{88}H_{106}Si_4$  ( $M^+$ ) 1274.737, found 1274.276.

## 2.2. Synthesis of Pentacene Precursor for 2,2'-linked Pentacene Dimers:

Compound **1,2,3** was synthesized according to procedure reported in the literature.<sup>[4]</sup>

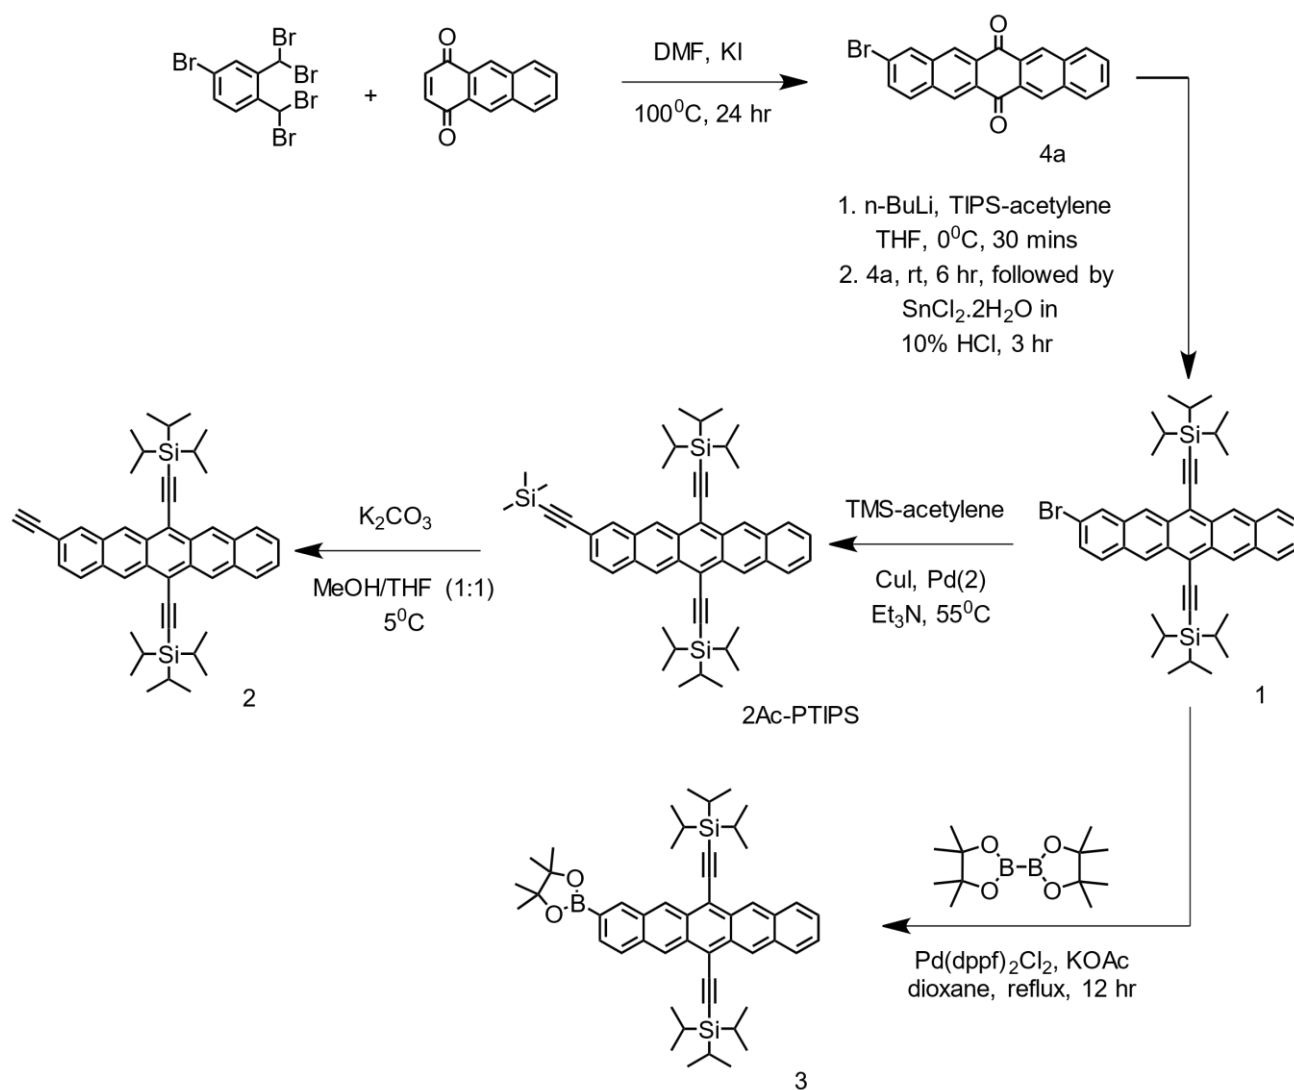

**Figure S2.2.** Synthesis of Pentacene precursor for 2,2' linked pentacene dimers.

### Anthracene-1,4-dione:

Following a literature procedure<sup>[5]</sup>, quinizarine (15.0 g, 62.5 mmol) was dissolved in 300 mL of methanol, the mixture was then cooled to 0 °C and NaBH<sub>4</sub> (9.7 g, 25 mmol) was added portion-wise. The mixture was stirred for 2 h, then 110 mL of a 6 N aqueous solution of HCl were slowly added. The precipitated was filtered and washed with water and cold acetone. 11.6 g (yield 89%) of a red-

orange solid were obtained. The spectral data were in agreement with that previously reported in the literature.

#### **2-bromopentacene-6,13(5aH,13aH)-dione (4a):**

Following literature procedures, 4-Bromo-1,2-bis(dibromomethyl)benzene (9.0 g, 18.0 mmol), anthracene-1,4-dione (3.6 g, 17.0 mmol) and NaI (12.6 g, 84 mmol) were dissolved in 70 mL of dimethylformamide. The mixture was stirred at 110 °C for 24 h. Then the reaction was cooled to 0 °C and filtered, the collected solid was washed thoroughly with H<sub>2</sub>O, methanol, acetone and diethylether. 4.34 g (yield 66%) of a gold-like insoluble solid were recovered. The spectrometric mass data are in agreement with that previously reported in the literature.

#### **((2-bromopentacene-6,13-diyl)bis(ethyne-2,1-diyl))bis(triisopropylsilane) (1)**

Following literature procedures, to a solution of (triisopropylsilyl)acetylene (3.5 equiv.) in dry and degassed THF (25 mL) in 200 mL Schlenk flask at -78 °C added n-butyl lithium (3.4 equiv., 2.5 M in hexanes). This solution was allowed to stir at -78 °C for 1 h followed by the addition of 3 (4.0 g, 1.0 equiv.) under positive argon flow. The solution was allowed to warm to rt and stirred overnight (16 h) or until solid pentacenequinone was no longer observed. To this clear, deep yellow solution was added of a saturated solution of tin (II) chloride dihydrate in aqueous solution (50 mL) during which the solution turned deep blue. The resulting mixture was stirred at rt for 1 h under dark and filtered over a pad of silica. The solid was washed with DCM and the combined organic layer was washed with water (2 x 200 mL), dried over anhyd. Na<sub>2</sub>SO<sub>4</sub>, filtered and the solvent was removed under reduced pressure to get the crude product. The crude was purified by silica chromatography using hexanes as an eluent to obtain bromo pentacene derivative 1 as a deep blue solid in 65% yield. <sup>1</sup>H NMR (500 MHz, CDCl<sub>3</sub>, δ ppm): 9.34 (s, 1H), 9.32 (s, 1H), 9.29 (s, 1H), 9.22 (s, 1H), 8.16 (s, 1H), 8.01-7.99 (m, 2H), 7.87-7.86 (m, 1H), 7.48-7.44 (m, 3H) and 1.44-1.38 (m, 42H).

**((2-ethynylpentacene-6,13-diyl)bis(ethyne-2,1-diyl))bis(triisopropylsilane)(2):**

To a solution of trimethylsilylacetylene (3.0 mL, 2.108 g, 21.46 mmol) and pentacene derivative, **1** (4.0 g, 5.57 mmol), in dry THF and toluene mixture (3:1, 15 mL) and diisopropylamine (5.0 mL, 3.6 g, 36 mmol) which had been deoxygenated for 10 min with argon was added Pd(PPh<sub>3</sub>)<sub>4</sub> (0.030 g, 0.026 mmol) and CuCl (0.010 g, 0.10 mmol). The reaction mixture was further deoxygenated with argon for an additional 2 min. The reaction mixture was stirred for 24 h at 55 °C, cooled to rt, and poured into satd. aq. NH<sub>4</sub>Cl (100 mL). H<sub>2</sub>O (150 mL) was added, and the mixture was extracted with CH<sub>2</sub>Cl<sub>2</sub> (80 mL, 50 mL). The organic phase was washed with 5% NH<sub>4</sub>Cl (200 mL), dried (Na<sub>2</sub>SO<sub>4</sub>), filtered, and the solvent removed in vacuo. Column chromatography (silica gel, hexanes/chloroform) afforded **2Ac-PTIPS** (yield 65%) as a dark green solid.

To a solution of **2Ac-PTIPS** (2 g, 2.72 mmol) in THF (100 mL) and MeOH (100 mL) cooled to 0 °C was added K<sub>2</sub>CO<sub>3</sub> (1.21 g, 8.75 mmol). The reaction mixture was maintained between 0 °C and 5 °C and stirred for 5.5 h and then poured into satd. aq. NH<sub>4</sub>Cl (200 mL). H<sub>2</sub>O (50 mL) was added, and the mixture was extracted with hexanes (80 mL, 2 × 50 mL). The combined organic phase was washed with satd. aq. NH<sub>4</sub>Cl (200 mL), satd. aq. NaHCO<sub>3</sub> (200 mL), satd. aq. NaCl (150 mL), dried (Na<sub>2</sub>SO<sub>4</sub>), and the solvent removed in vacuo. Column chromatography (silica gel, hexanes/chloroform) afforded **6** (yield 75%) as a dark green solid. <sup>1</sup>H NMR (500 MHz, CDCl<sub>3</sub>): δ 9.28 (s, 2H), 9.24 (s, 2H), 8.14 (s, 1H), 7.97–7.94 (m, 2H), 7.90–7.88 (d, 1H), 7.42–7.38 (m, 2H), 7.36 (d, 1H), 3.27 (s, 1H), 1.36–1.33 (m, 42H).

**((2-(4,4,5,5-tetramethyl-1,3,2-dioxaborolan-2-yl)pentacene-6,13-diyl)bis(ethyne-2,1-diyl))bis(triisopropylsilane) (3):**

To a dry round bottomed flask was added **1** (4.0 g, 5.57 mmol), Pd(dppf)<sub>2</sub>Cl<sub>2</sub> · DCM (203 mg, 0.25 mmol), KOAc (1.91 g, 19.5 mmol), and bis(pinacolato)diboron (2.82g, 11.1 mmol). Sequential vacuum and argon were used to degas the mixture followed by the addition of degassed 1,4-dioxane (70 mL).

The mixture was heated to 80 °C and maintained for 12 h in the dark. After the reaction, the mixture was cooled to rt and the solvent was removed under reduced pressure. The crude was partitioned between DCM (250 mL) and water (200 mL). The organic layer was separated, washed with water (2 x 200 mL), dried over anhyd. Na<sub>2</sub>SO<sub>4</sub>, filtered and the solvent was removed under reduced pressure to get the crude product. The crude was purified by silica chromatography using mixtures of hexanes/DCM as an eluent to obtain BPin pentacenes derivative **3** as a deep blue solid in 49% yield. <sup>1</sup>H NMR (500 MHz, CDCl<sub>3</sub>, δ ppm): 9.34-9.32 (m, 2H), 9.30 (s, 1H), 9.27 (s, 1H), 8.51-8.507 (m, 1H), 7.98-7.95 (m, 2H), 7.93-7.90 (m, 1H), 7.72-7.70 (m, 1H), 7.42-7.40 (m, 2H), 1.44 (s, 12H) and 1.41-1.36 (m, 42H).

### 2.3. Synthesis of Diethynyl derivative of Oligo-(phenylene) Linkers:

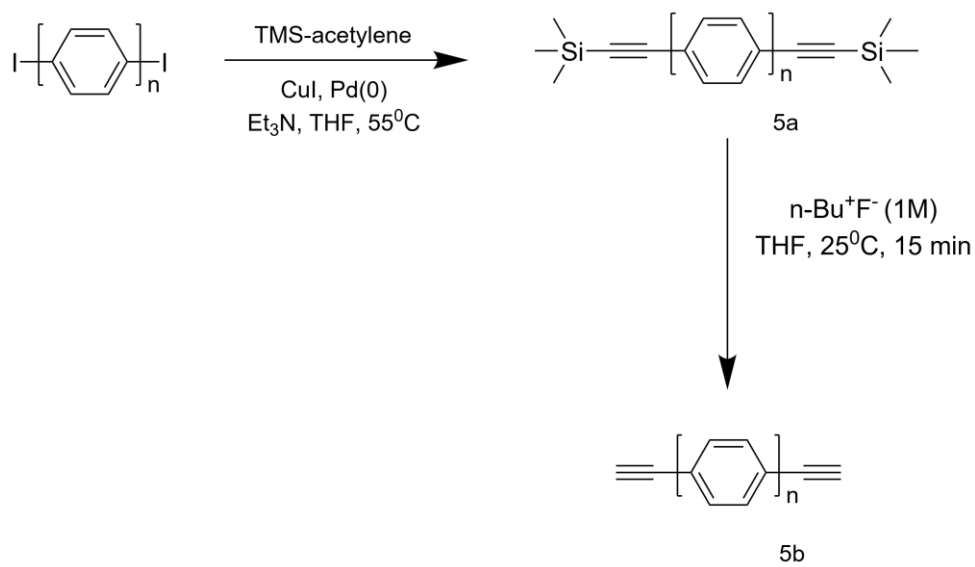

**Figure S2.3.** Synthesis of diethynyl derivative of linkers.



## 2.4. General Synthetic Procedure for Synthesis of 6,6' Pentacene Dimes:

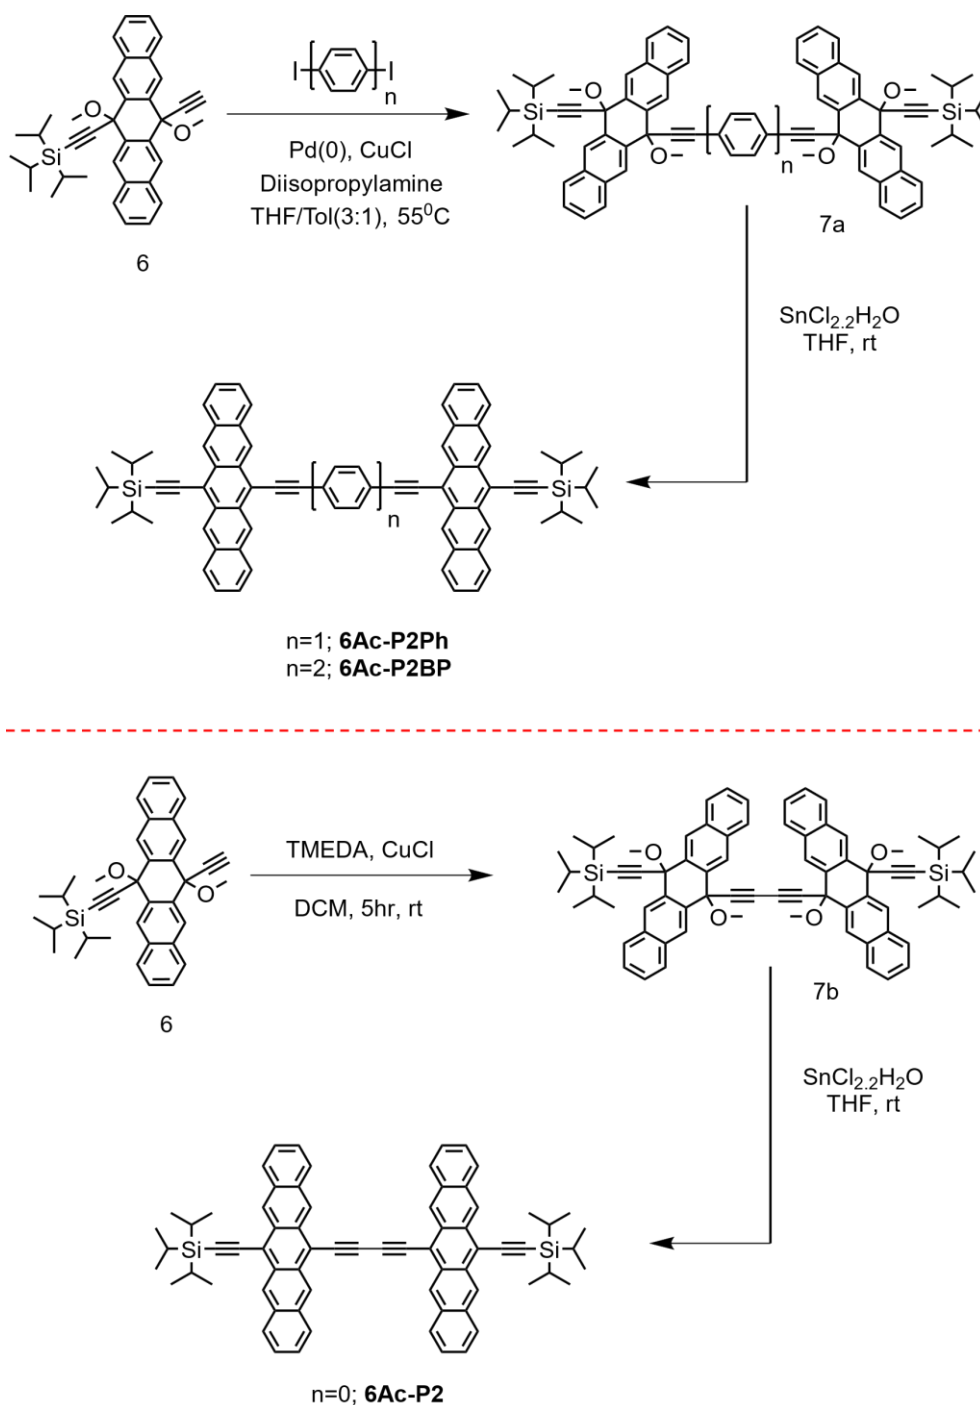

**Figure S2.4.** Synthesis of 6,6'-linked pentacene dimers.

The targeted molecules **6Ac-P** were synthesized according to the known procedure as described in the literature. The synthetic route and the molecular structures are illustrated in Scheme S2.4. Intermediates and final compounds were purified by silica gel chromatography; structures and purity were confirmed by <sup>1</sup>H, <sup>13</sup>C and MALDI-TOF.

#### 2.4.1. Synthesis of 6,6' Pentacene Dimers (6Ac-P2Ph and 6Ac-P2BP):

To a solution of **7a-b** (0.18 mmol, 1 equiv) in dry THF (12 mL) that had been deoxygenated by bubbling argon for 2 min was added SnCl<sub>2</sub>·2H<sub>2</sub>O (0.21g, 0.92 mmol, 5.1 equiv). The reaction flask was wrapped in aluminium foil to limit light exposure. This mixture was further deoxygenated for ca. 2 min. The solution was stirred at rt for a total of 5.5 h before pouring the mixture into MeOH (70 mL). The mixture was filtered and the solid was washed with MeOH (5 × 15 mL). The solid was suspended in CH<sub>2</sub>Cl<sub>2</sub> (ca. 5 mL) and stirred for 5 min before adding hexanes (ca. 40 mL). The mixture was filtered and the solid was washed with hexanes (4 × 15 mL) to afford the analogous **6Ac-P** (yield 75-85%) as a blue-green solid.

#### Spectroscopic Characterisation of 6Ac-P2Ph:

Yield: 0.162g (87%). The product has low solubility, thus <sup>1</sup>H and <sup>13</sup>C NMR spectroscopy have poorly defined signals. <sup>1</sup>H NMR (500 MHz, CDCl<sub>3</sub>): δ 9.28 (s, 4H), 9.27 (s, 4H), 8.07–8.04 (m, 4H), 8.03 (s, 4H), 7.99-7.95 (m, 4H), 7.44–7.40 (m, 8H), 1.40-1.36 (m, 42H). <sup>13</sup>C NMR (100 MHz, CDCl<sub>3</sub>): δ 132.36, 132.04, 130.66, 130.30, 128.83, 128.68, 126.60, 126.25, 126.16, 125.94, 123.92, 118.86, 117.66, 107.57, 104.80, 104.53, 90.64, 19.12, 11.79. MALDI-MS m/z calcd. for C<sub>76</sub>H<sub>70</sub>Si<sub>2</sub> (M<sup>+</sup>) 1038.501, found 1038.567.

#### Spectroscopic Characterisation of 6Ac-P2BP:

Yield: 0.174g (87%). The product has low solubility, thus <sup>1</sup>H and <sup>13</sup>C NMR spectroscopy have poorly defined signals. <sup>1</sup>H NMR (500 MHz, CDCl<sub>3</sub>): δ 9.31-9.29 (s, 4H+4H), 8.07–8.02 (m, 8H), 7.97 (d, 4H), 7.88 (d, 4H), 7.44–7.40 (m, 8H), 1.40-1.36 (m, 42H). <sup>13</sup>C NMR (125 MHz, CDCl<sub>3</sub>): δ 140.59, 132.49, 132.40, 132.36, 130.74, 130.34, 128.82, 128.73, 127.37, 126.58, 126.21, 126.15, 126.05, 123.16, 118.63, 117.98, 107.45, 104.82, 104.47, 89.28, 19.11, 11.78. MALDI-MS m/z calcd. for C<sub>82</sub>H<sub>74</sub>Si<sub>2</sub> ([M-H]<sup>+</sup>) 1113.525, found 1113.536.

### Spectroscopic Characterisation of 6Ac-P2:

Yield: 0.123g (71%). The product has low solubility, thus <sup>1</sup>H and <sup>13</sup>C NMR spectroscopy have poorly defined signals. <sup>1</sup>H NMR (500 MHz, CDCl<sub>3</sub>): δ 9.39 (s, 4H), 9.34 (s, 4H), 8.16-8.13 (m, 4H), 8.02-7.98 (m, 4H), 7.47-7.43 (m, 8H), 1.40-1.37 (m, 42H). <sup>13</sup>C NMR (125 MHz, CDCl<sub>3</sub>): δ 132.82, 132.51, 131.59, 130.59, 128.85, 128.73, 126.97, 126.58, 126.36, 125.94, 120.00, 116.40, 108.65, 104.69, 89.76, 86.52, 17.12, 11.77. MALDI-MS m/z calcd. for C<sub>70</sub>H<sub>66</sub>Si<sub>2</sub> (M<sup>+</sup>) 962.470, found 962.173.

### 2.4.2. Synthesis of 6,6' Pentacene Dimer Precursor (7a):

To a solution of **6** (0.400 g, 0.74 mmol, 2 equiv) and diiodo derivative of the linker (0.37 mmol, 1 equiv) in dry THF and toluene mixture (3:1, 15mL) and diisopropylamine (5.0 mL, 3.6 g, 36 mmol) which had been deoxygenated for 10 min with argon was added Pd(PPh<sub>3</sub>)<sub>4</sub> (0.030 g, 0.026 mmol) and CuCl (0.010 g, 0.10 mmol). The reaction mixture was further deoxygenated with argon for an additional 2 min. The reaction mixture was stirred for 24 h at 55 °C, cooled to rt, and poured into satd. aq. NH<sub>4</sub>Cl (100 mL). H<sub>2</sub>O (150 mL) was added, and the mixture was extracted with CH<sub>2</sub>Cl<sub>2</sub> (80 mL, 50 mL). The organic phase was washed with 5% NH<sub>4</sub>Cl (200 mL), dried (Na<sub>2</sub>SO<sub>4</sub>), filtered, and the solvent removed in vacuo. Column chromatography (silica gel, 15:2 hexanes/EtOAc) afforded **7a** (yield 55-65%) as an off white foamy solid.

### Spectroscopic Characterisation of 7a (n=1):

Yield: 0.271g (63%). <sup>1</sup>H NMR (500 MHz, CDCl<sub>3</sub>): δ 8.69 (s, 4H), 8.40 (s, 4H), 7.94-7.92 (m, 4H), 7.90-7.87 (m, 4H), 7.53-7.50 (m, 8H), 7.11 (s, 4H), 3.06 (s, 6H, OCH<sub>3</sub>), 3.00 (s, 6H, OCH<sub>3</sub>), 1.25-1.22 (m, 42H).

### Spectroscopic Characterisation of 7b (n=2):

Yield: 0.289g (63%). <sup>1</sup>H NMR (500 MHz, CDCl<sub>3</sub>): δ 8.71 (s, 4H), 8.45 (s, 4H), 7.98-7.95 (m, 4H), 7.92-7.89 (m, 4H), 7.55-7.52 (m, 8H), 7.33 (br, 8H), 3.09 (s, 6H, OCH<sub>3</sub>), 3.05 (s, 6H, OCH<sub>3</sub>), 1.25-1.22 (m, 42H).

### 2.4.3. Synthesis of 6,6' Pentacene Dimer Precursor (7b):

To a suspension of CuCl (0.040 g, 0.40 mmol) in TMEDA (1.1 mL, 0.85 g, 7.3 mmol) was added dry CH<sub>2</sub>Cl<sub>2</sub> (10 mL). This suspension was oxygenated by bubbling O<sub>2</sub> for approx. 2 min. To this mixture was added a solution of **1** (0.200 g, 0.367 mmol) in dry CH<sub>2</sub>Cl<sub>2</sub> (3 mL). The reaction mixture was allowed to stir 4 h at rt open to the atmosphere and then poured into satd. aq. NH<sub>4</sub>Cl (200 mL). The mixture was extracted with CH<sub>2</sub>Cl<sub>2</sub> (2 × 50 mL). The combined organic phase was washed with H<sub>2</sub>O (200 mL, 150 mL), satd. aq. NaCl (150 mL), dried (Na<sub>2</sub>SO<sub>4</sub>), and the solvent removed in vacuo. Column chromatography (silica gel, 4:1 CH<sub>2</sub>Cl<sub>2</sub>/hexanes) afforded the product (0.119 g, 60%) as a blue-green solid.

### Spectroscopic Characterisation of 7b (n=0):

Yield: 0.289g (63%). <sup>1</sup>H NMR (500 MHz, CDCl<sub>3</sub>): δ 8.60 (s, 4H), 8.30 (s, 4H), 7.89-7.85 (m, 4H), 7.87-7.84 (m, 4H), 7.51-7.48 (m, 8H), 2.96 (s, 6H, OCH<sub>3</sub>), 2.92 (s, 6H, OCH<sub>3</sub>), 1.17-1.14 (m, 42H).

#### 2.4.4. Synthesis of Pentacene Precursor for 6,6'-linked Pentacene Dimers:

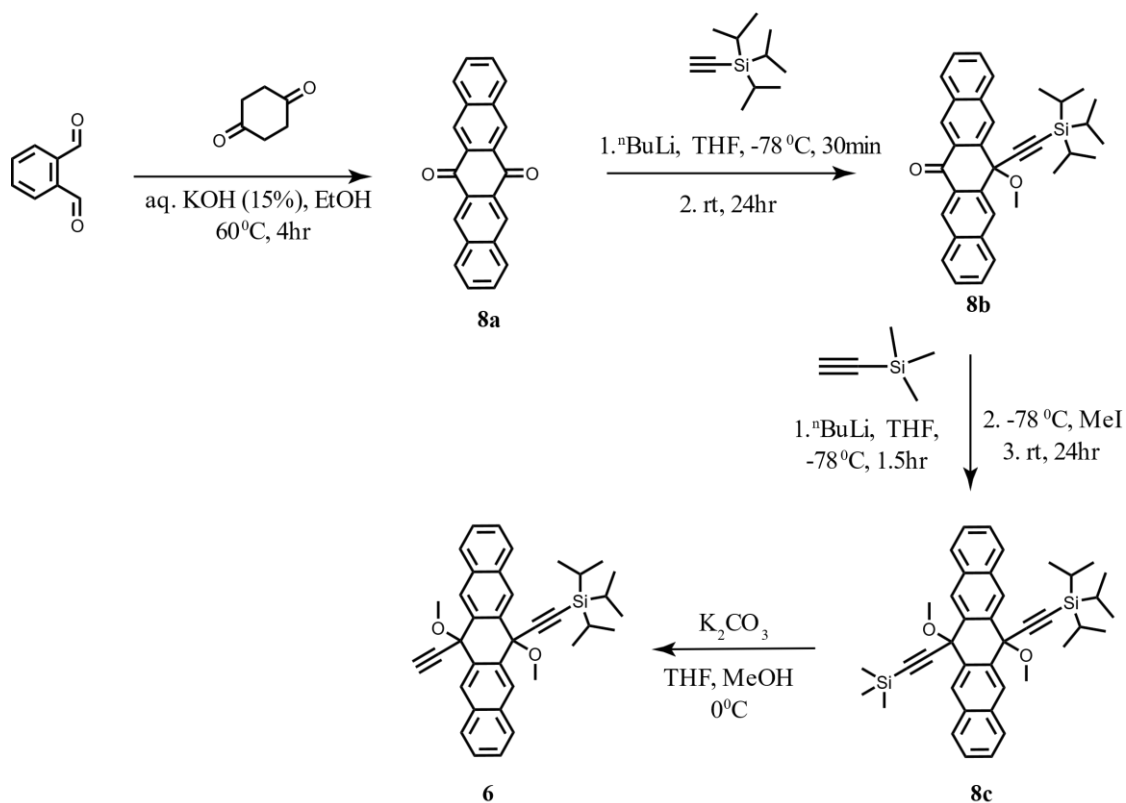

**Figure S2.5.** Synthesis of Pentacene precursor for 6,6'-linked pentacene dimers.

Compound 6 was synthesized according to procedure reported in the literature.<sup>[6,7]</sup>

**Synthesis and Spectroscopic Characterisation of pentacene-6,13-quinone (8a):** 6.20 g (46.2 mmol) of ortho-phthalaldehyde and 2.50 g (22.3 mmol) of cyclohexanedione were dissolved in 250 mL of ethanol. 20 mL of a 15% aqueous KOH solution was added, upon which the solution turned brownish, and a yellow/orange precipitate formed. For completion of the reaction the mixture was stirred for an additional 4 h at rt. After cooling the solid was filtered and thoroughly washed with acetone, giving the product as a yellow solid (6.125 g, 19.8 mmol; 90 %). The product was carried forward to the next step as such. <sup>1</sup>H NMR (500 MHz, CDCl<sub>3</sub>): δ 8.89 (s, 4H), 8.08-8.06 (dd, 4H), 7.66-7.64 (dd, 4H).

### Synthesis and Spectroscopic Characterisation of 8b:

To a solution of tri-isopropylsilylacetylene (4.25 g, 23.3 mmol) in THF (30 mL) cooled to -78 °C was added dropwise <sup>n</sup>BuLi (1.6 M in hexanes, 12.5 mL, 20 mmol). The solution was allowed to stir for 15 min before being transferred slowly via cannula into a suspension of 6,13-pentacenequinone (6.16 g, 20 mmol) in THF (70 mL) at rt. The reaction mixture was stirred for 24 h at rt. The reaction was cooled to -15 °C and quenched via the addition of satd. aq. NH<sub>4</sub>Cl (1 mL). The suspension was filtered and the solid was washed with 1:1 THF/water (3 × 4 mL), then THF (3 × 4 mL). This allowed for the recovery of the excess 6,13-pentacenequinone, which could be used in subsequent reactions after drying under high vacuum. The filtrate was collected into a filter flask which already contained satd. aq. NH<sub>4</sub>Cl (100 mL), and after filtration and mixing, the mixture was extracted with CH<sub>2</sub>Cl<sub>2</sub> (60 mL, 40 mL). The combined organic phase was washed with satd. aq. NaCl (100 mL), dried (Na<sub>2</sub>SO<sub>4</sub>), and the solvent removed in vacuo to provide a solid orange residue. This solid was redissolved in minimum volume CH<sub>2</sub>Cl<sub>2</sub> and precipitated by adding hexanes (100 mL) and cooling to -78 °C. The yellow-coloured solid was collected by vacuum filtration and washed with cold hexanes (3 × 4 mL). A second crop of product was obtained from the filtrate and combined with the first crop. The solid was redissolved in acetone and filtered to remove insoluble impurities. The solvent of the filtrate was removed in vacuo to afford 4b (8.85 g, 90%) as a yellow solid. <sup>1</sup>H NMR (500 MHz, CDCl<sub>3</sub>): δ 8.84 (s, 2H), 8.73 (s, 2H), 8.06-8.04 (d, J = 8 Hz, 2H), 7.94-7.93 (d, J = 8 Hz, 2H), 7.66-7.63 (app t, J = 7.5 Hz, 2H), 7.60-7.57 (app t, J = 7.5 Hz, 2H), 2.99 (s, 1H), 1.17–1.15 (m, 21H). <sup>13</sup>C NMR (125 MHz, CDCl<sub>3</sub>): δ 184.4, 138.7, 135.6, 132.8, 129.8, 129.7, 128.9, 128.5, 128.2, 127.4, 127.3, 108.2, 90.1, 68.7, 18.7, 11.3.

### Synthesis and Spectroscopic Characterisation of 8c:

To a solution of trimethylsilylacetylene (3.0 mL, 2.108 g, 21.46 mmol) in THF (20 mL) cooled to -78 °C was added slowly <sup>n</sup>BuLi (1.6 M in hexanes, 11.5 mL, 18.36 mmol). The solution was allowed to stir for 15 min before being transferred via cannula into a solution of 4b (3 g, 6.12 mmol) in THF (30 mL) cooled to -78 °C. The reaction mixture was allowed to stir at -78 °C for 15 min before removing the

cooling bath and allowing the solution to warm to 0 °C and stir for 2.5 h. The solution was cooled to -78 °C and MeI (3.8 mL, 8.68 g, 61.2 mmol) was added slowly. The reaction flask was wrapped in aluminium foil to limit light exposure and the mixture was allowed to warm to rt and stir for 24 h. The mixture was cooled to 0 °C and poured into satd. aq. NH<sub>4</sub>Cl (150 mL). H<sub>2</sub>O (150 mL) was added, and the mixture was extracted with CH<sub>2</sub>Cl<sub>2</sub> (2 × 50 mL). The combined organic phase was washed with H<sub>2</sub>O (200 mL), satd. aq. NaCl (150 mL), dried (Na<sub>2</sub>SO<sub>4</sub>), and the solvent removed in vacuo. Column chromatography (silica gel, 1:1 CH<sub>2</sub>Cl<sub>2</sub>/hexanes) afforded 4c (2.9 g, 78%) as an off white solid. <sup>1</sup>H NMR (500 MHz, CDCl<sub>3</sub>): δ 8.68 (s, 2H), 8.41 (s, 2H), 7.98–7.95 (m, 2H), 7.92–7.89 (m, 2H), 7.56–7.51 (m, 4H), 3.01 (s, 3H), 3.00 (s, 3H), 1.26–1.20 (m, 21H), 0.06 (s, 9H). <sup>13</sup>C NMR (125 MHz, CDCl<sub>3</sub>): δ 134.0, 133.5, 133.3, 132.7, 128.2, 128.1, 128.0, 126.9, 126.7, 126.6, 106.7, 105.5, 91.6, 90.2, 75.9, 73.6, 51.9, 51.8, 18.7, 11.4, - 0.2.

### Synthesis and Spectroscopic Characterisation of 6:

To a solution of 4c (4.88 g, 7.91 mmol) in THF (100 mL) and MeOH (100 mL) cooled to 0 °C was added K<sub>2</sub>CO<sub>3</sub> (1.21 g, 8.75 mmol). The reaction mixture was maintained between 0 °C and 5 °C and stirred for 5.5 h and then poured into satd. aq. NH<sub>4</sub>Cl (200 mL). H<sub>2</sub>O (50 mL) was added, and the mixture was extracted with hexanes (80 mL, 2 × 50 mL). The combined organic phase was washed with satd. aq. NH<sub>4</sub>Cl (200 mL), satd. aq. NaHCO<sub>3</sub> (200 mL), satd. aq. NaCl (150 mL), dried (Na<sub>2</sub>SO<sub>4</sub>), and the solvent removed in vacuo. The rather pure oil was redissolved in minimal CH<sub>2</sub>Cl<sub>2</sub> (ca. 2 mL) and precipitated through the addition of MeOH (80 mL) and cooling to -78 °C. The solid was washed with cold MeOH (3 × 15 mL) to afford 1 (3.81 g, 88%) as an off white solid. <sup>1</sup>H NMR (500 MHz, CDCl<sub>3</sub>): δ 8.70 (s, 2H), 8.43 (s, 2H), 7.99–7.94 (m, 2H), 7.94–7.89 (m, 2H), 7.57–7.51 (m, 4H), 3.04 (s, 3H), 3.02 (s, 3H), 2.69 (s, 1H), 1.28–1.21 (m, 21H). <sup>13</sup>C NMR (125 MHz, CDCl<sub>3</sub>): δ 133.52, 133.50, 133.1, 132.9, 128.3, 128.2, 128.1, 126.93, 126.89, 126.7, 105.2, 92.1, 85.9, 76.0, 73.7, 72.9, 51.9, 51.8, 18.8, 11.4.

### 3. Computational Methods

Calculations were done using Density Functional Theory (DFT). The lowest energy conformers in the ground state were calculated with the CAM-B3LYP<sup>[2]</sup> functional and the 6-31G(d)<sup>[3]</sup> basis set using the Gaussian program package.<sup>[1]</sup> All states were found using DFT. The basis set size is kept nominal due to the large number of atoms. The presence of only real frequencies confirmed that these were indeed minima on the respective potential energy surfaces. The CAM-B3LYP functional is chosen based on its more accurate estimate of charge transfer excitations in acenes which B3LYP underestimates enormously.<sup>[2]</sup> Since the pentacene dimers discussed in this work are systems in which each monomer is covalently connected through linkers and is mainly affected by through-bond interactions, we have chosen a simple basis set without diffuse function.<sup>[8,9]</sup>

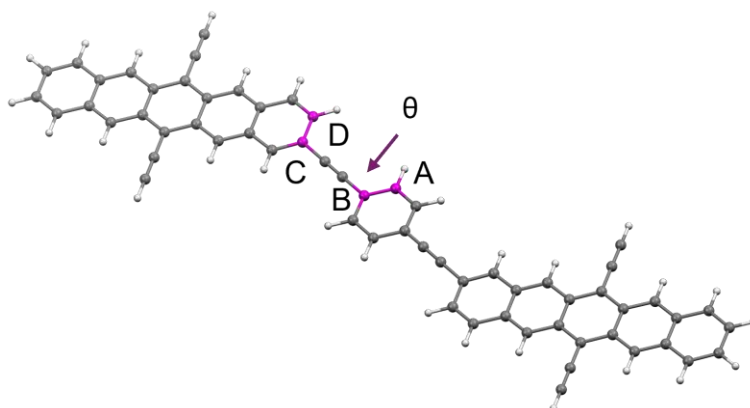

The same functional and basis set was used in the potential energy scan over the dihedral angle between the pentacene planes and the plane of the (oligo)phenylene linkers ( $\theta$ ) as to estimate the rotational energy barrier along the acetylene linkage as shown in Figure 2 to estimate the rotational energy barrier along the biphenyl axis. The potential energy of each conformer was calculated in a relaxed optimization where the angle  $\theta$  is fixed and all other atomic coordinates are allowed to relax to find the lowest energy of the system. No symmetry constraints were used.



### 3.1.1. Structural parameters

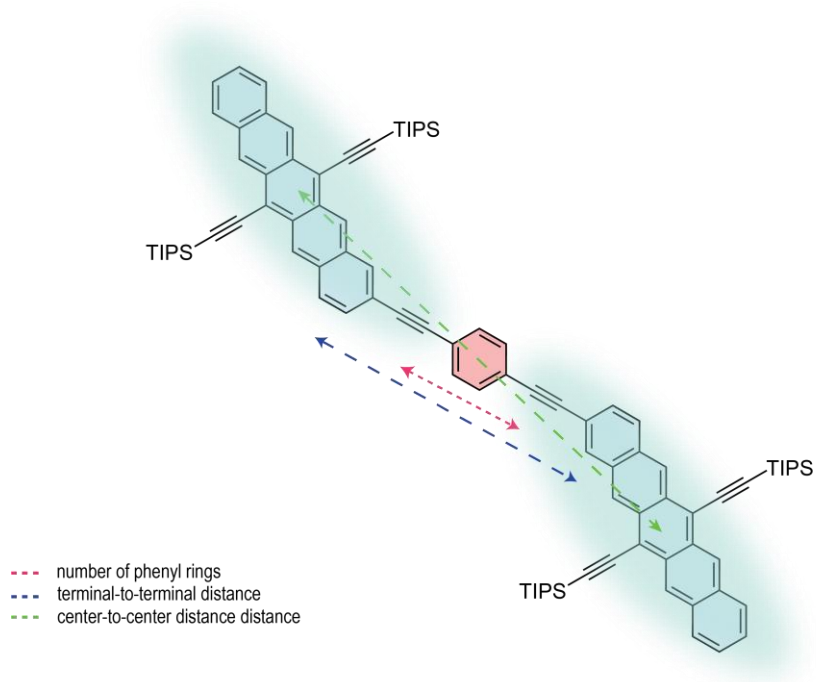

**Figure S3.1.1.** Pentacene-to-pentacene interchromophore distances. Center-to-center (green) defines the interchromophore distance between the central rings of each pentacene. Edge-to-edge (red) defines the interchromophore distance between the effective chromophore units depending on the extent of singlet density delocalisation. Terminal-to-terminal (blue) defines the interchromophore distance between the terminal rings of each pentacene.

| Compounds    |                 | Interpentacene distance<br>(Å)<br>(centre-to-centre) | Interpentacene distance<br>(Å)<br>(terminal-to-terminal) | $\theta$ (°) | $\phi$ (°)<br>biphenyl torsion |
|--------------|-----------------|------------------------------------------------------|----------------------------------------------------------|--------------|--------------------------------|
| <b>6Ac-P</b> | <b>6Ac-P2</b>   | 9.47                                                 | 9.47                                                     | 0            | NA                             |
|              | <b>6Ac-P2Ph</b> | 13.77                                                | 13.77                                                    | 0            | NA                             |
|              | <b>6Ac-P2BP</b> | 18.09                                                | 18.09                                                    | 0            | 37                             |
| <b>2-P</b>   | <b>2-P2</b>     | 13.62                                                | 4.33                                                     | 40           | NA                             |
|              | <b>2-P2Ph</b>   | 17.81                                                | 8.64                                                     | 37           | NA                             |
|              | <b>2-P2BP</b>   | 21.94                                                | 12.95                                                    | 37           | 37                             |
| <b>2Ac-P</b> | <b>2Ac-P2</b>   | 18.64                                                | 9.4                                                      | 0            | NA                             |
|              | <b>2Ac-P2Ph</b> | 22.82                                                | 13.77                                                    | 0            | NA                             |
|              | <b>2Ac-P2BP</b> | 27.03                                                | 18.09                                                    | 0            | 37                             |

**Table S3.1.1** Structural parameters of optimized geometries for **6Ac-P**, **2-P** and **2Ac-P** pentacene dimers.

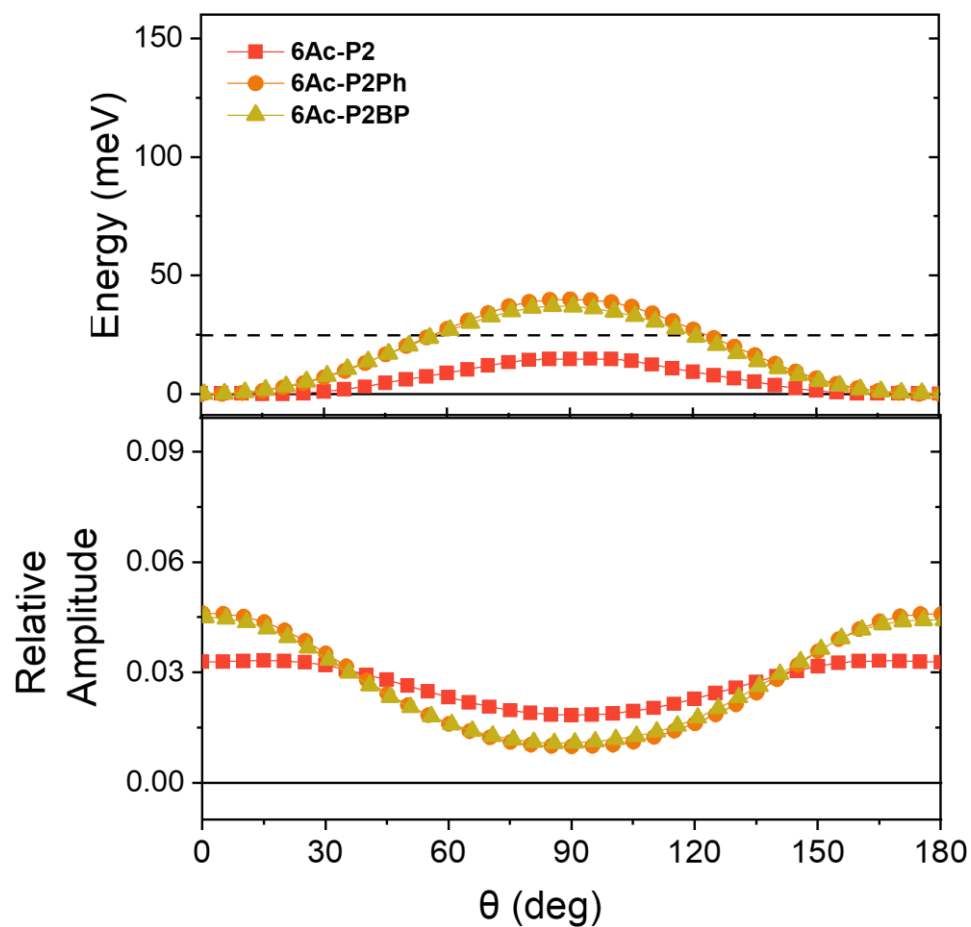

**Figure S3.1.2** Calculated potential energy curves (top) and relative probabilities (bottom) along the  $\theta$  coordinate in the ground state of **6Ac-P** dimers. The horizontal dashed lines in the top panels denote the room temperature energy.

### 3.2. Energy level splitting:

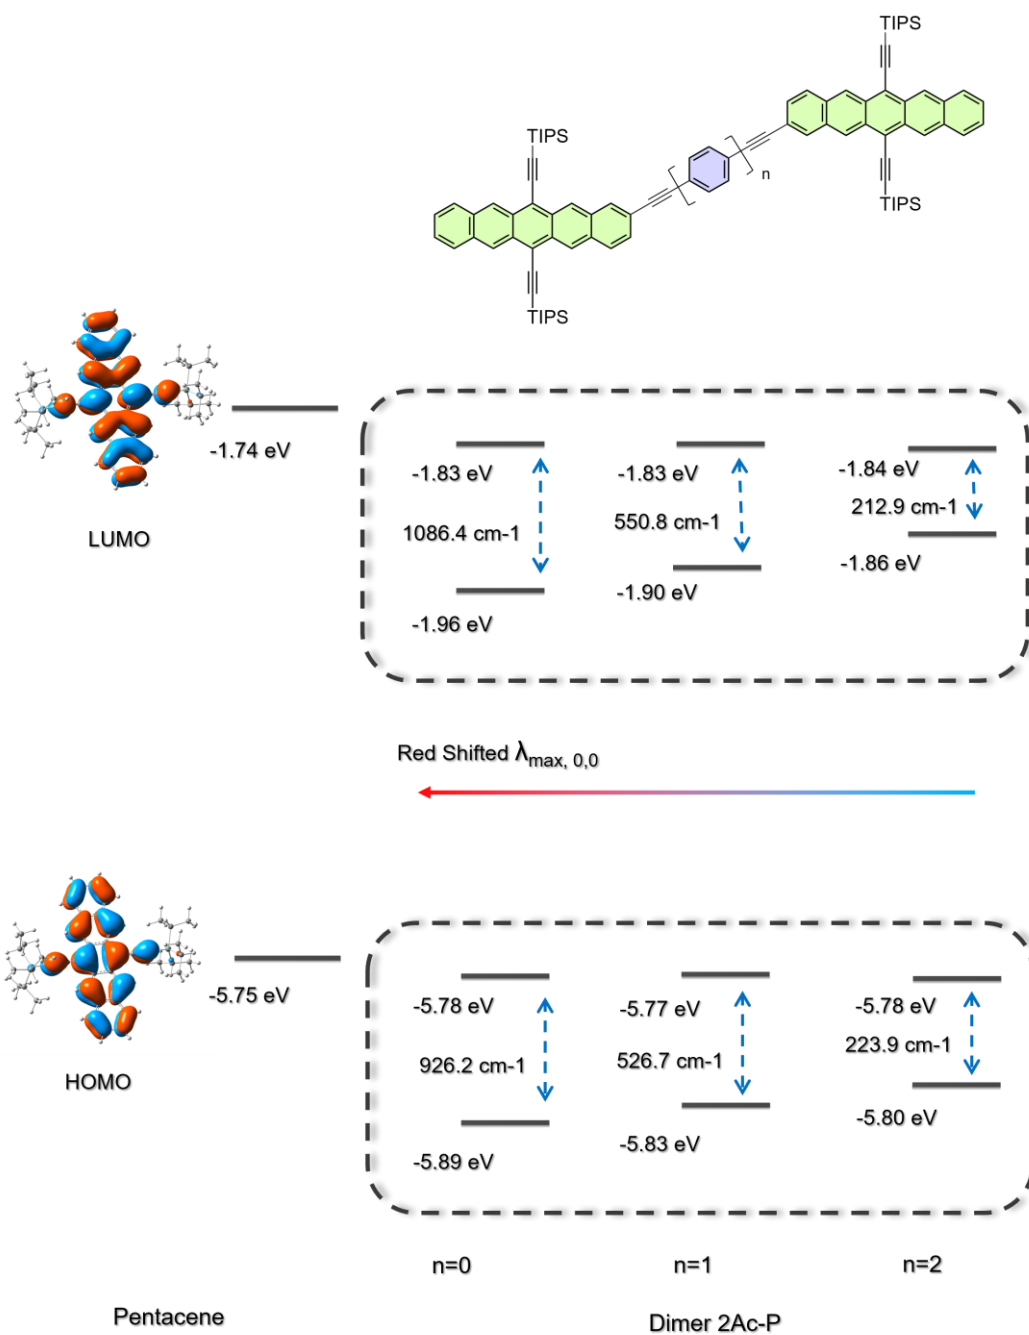

**Figure S3.2.1** Energy-level splitting between LUMO+1 and LUMO ( $\Delta E_{\text{LUMO}}$ ) and HOMO and HOMO-1 ( $\Delta E_{\text{HOMO}}$ ) 2Ac-P dimers.

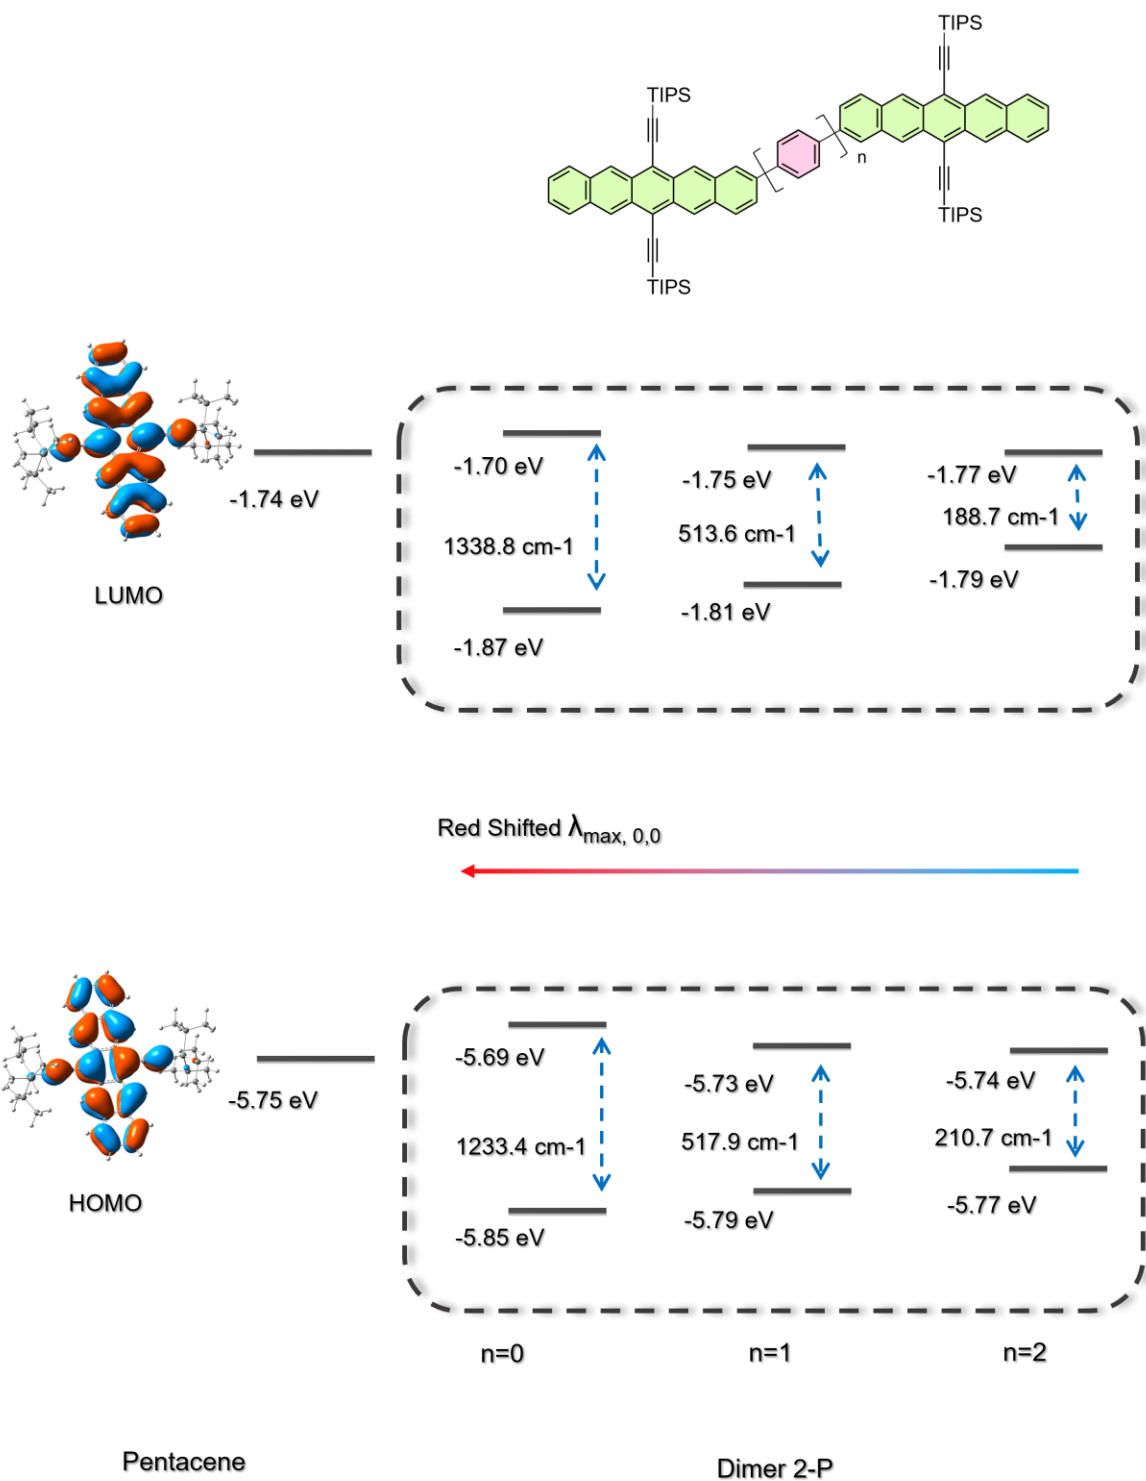

**Figure S3.2.2** Energy-level splitting between LUMO+1 and LUMO ( $\Delta E_{LUMO}$ ) and HOMO and HOMO-1 ( $\Delta E_{HOMO}$ ) 2-P dimers.

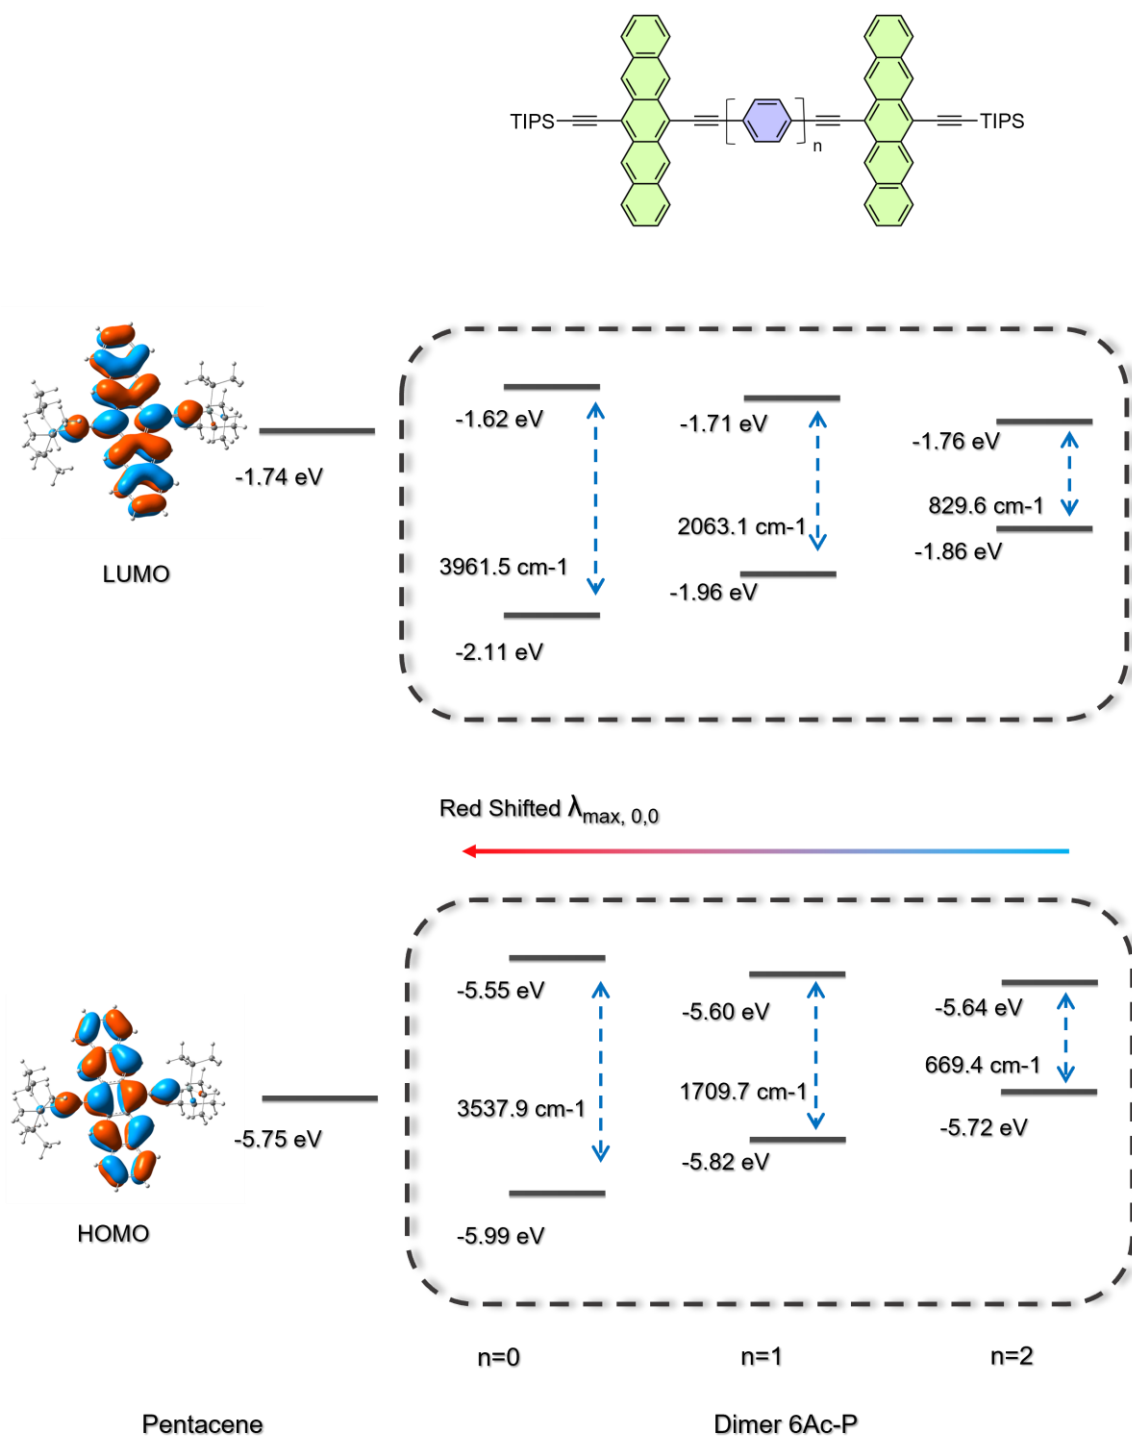

**Figure S3.2.3** Energy-level splitting between LUMO+1 and LUMO ( $\Delta E_{\text{LUMO}}$ ) and HOMO and HOMO-1 ( $\Delta E_{\text{HOMO}}$ ) 6Ac-P dimers.

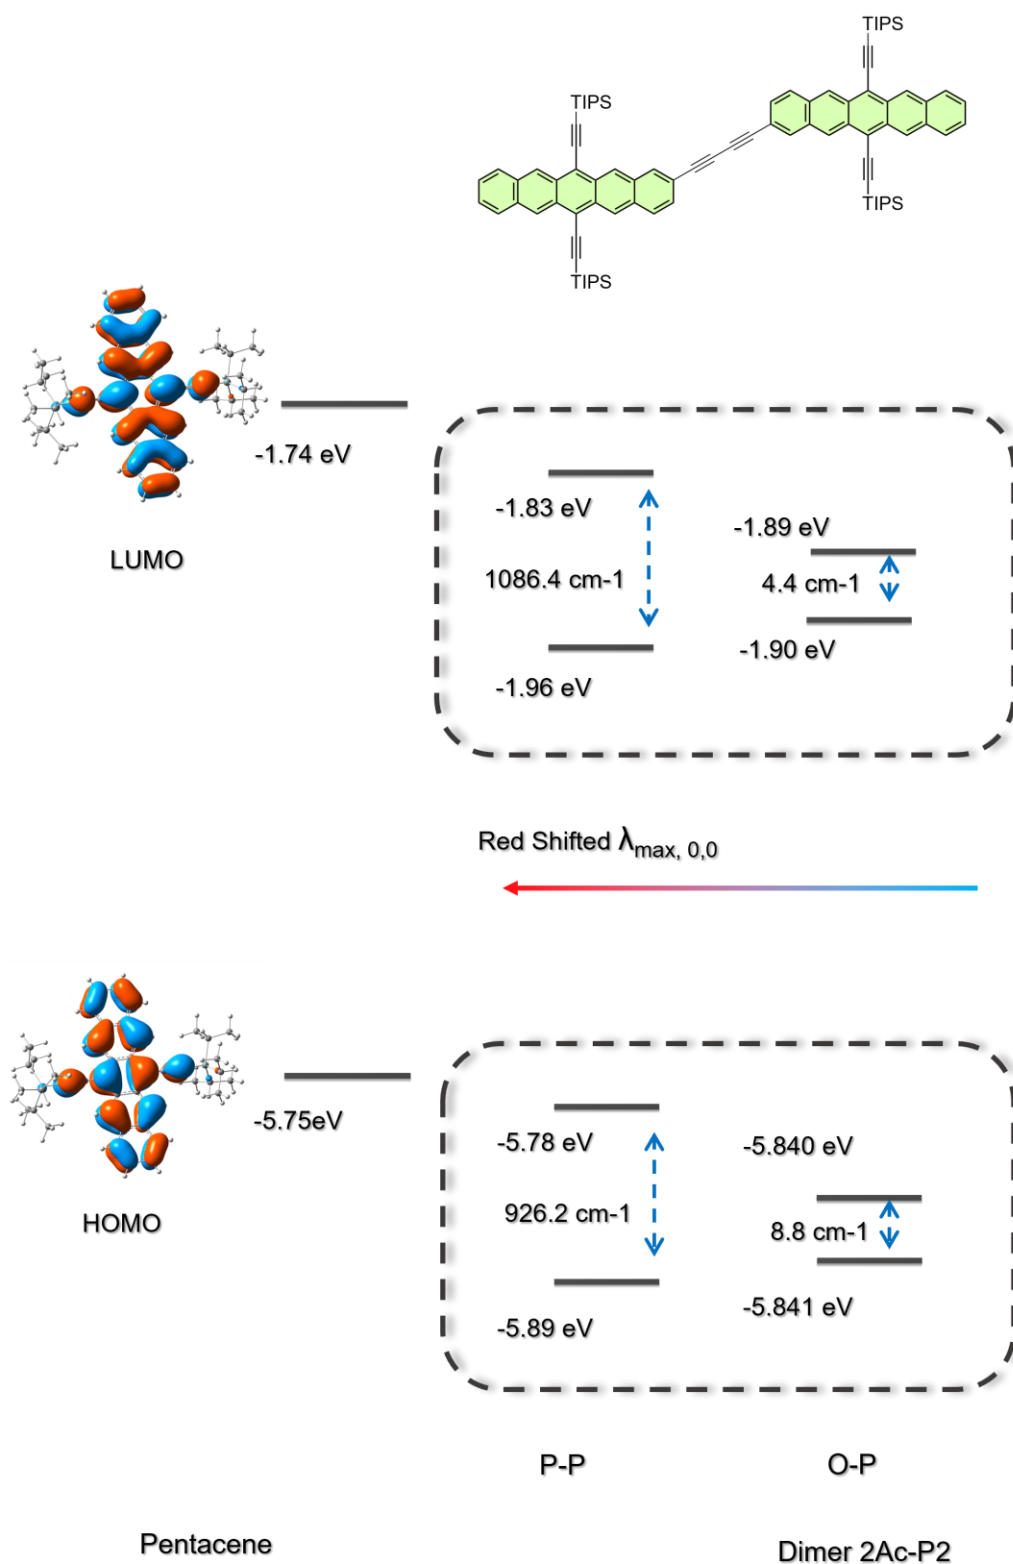

**Figure S3.2.4** Energy-level splitting between LUMO+1 and LUMO ( $\Delta E_{\text{LUMO}}$ ) and HOMO and HOMO-1 ( $\Delta E_{\text{HOMO}}$ ) in rotational conformers (P-P, O-P) of **2Ac-P2** dimer (DOI: 10.1021/jacs.3c06075). The P-P conformer represents the conformer when the two pentacenes are on the same plane and the same plane with the bridge. The O-P conformer represents the conformer when one of the pentacene is orthogonal to the plane of the other and the bridge. The O-O conformer represents the conformer where both the pentacenes are orthogonal to the bridge plane but are parallel to each other.

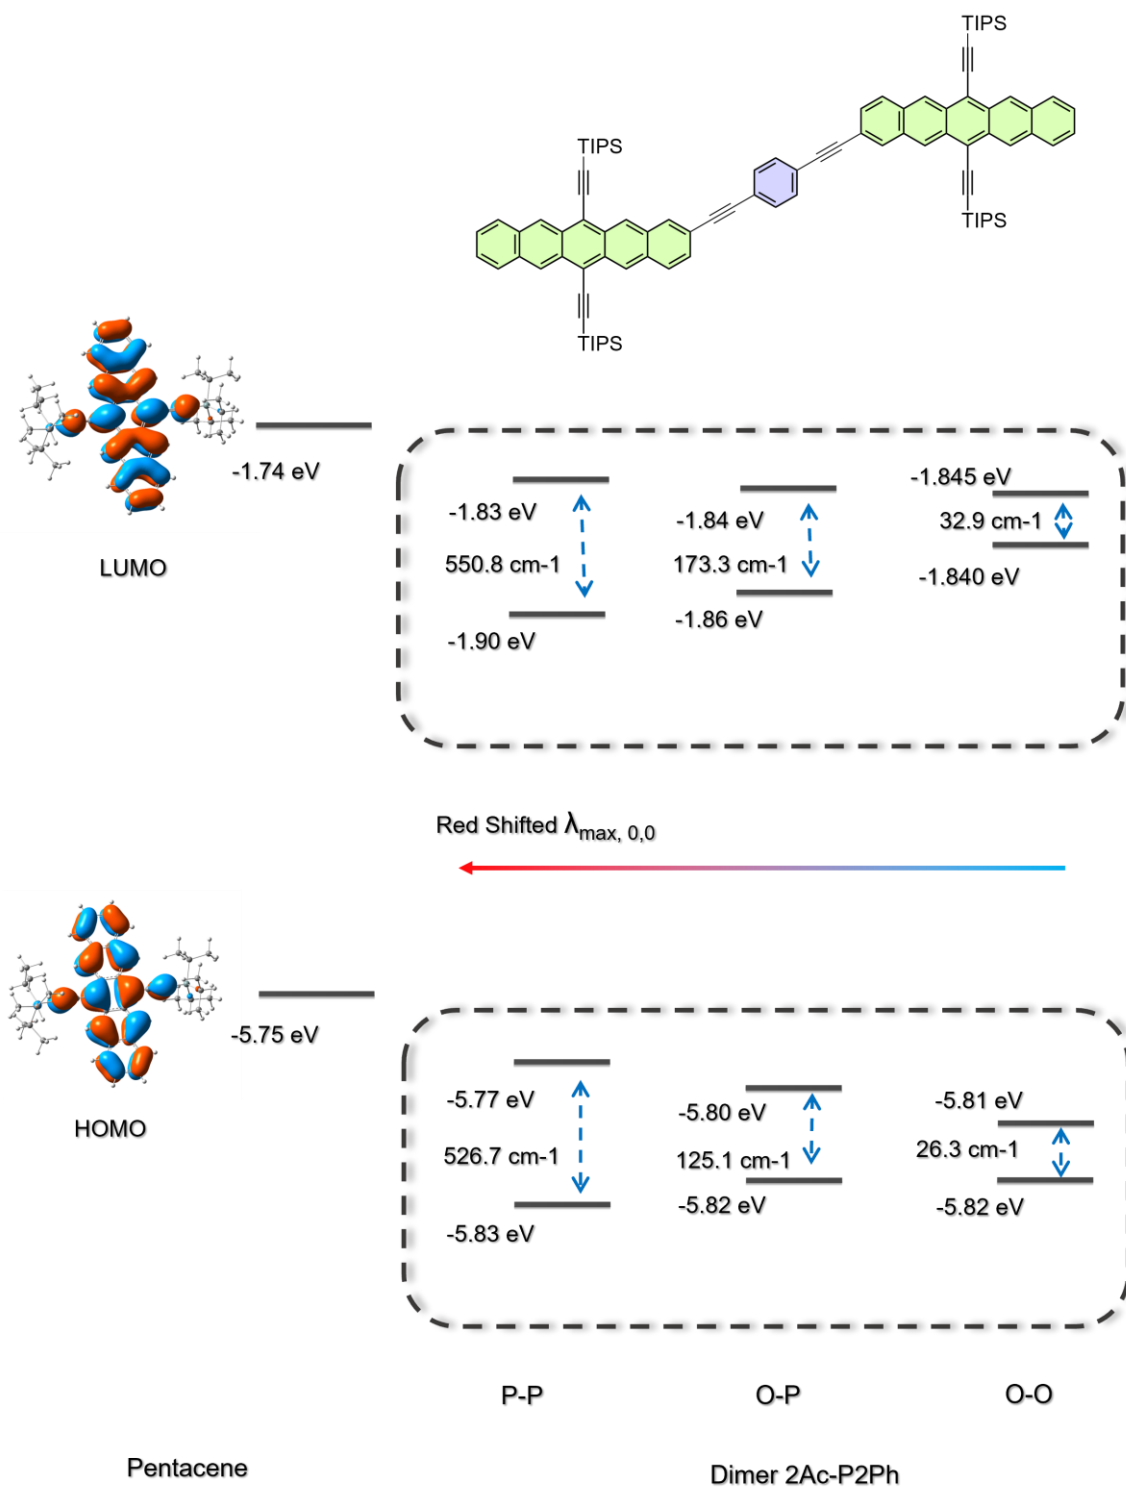

**Figure S3.2.5** Energy-level splitting between LUMO+1 and LUMO ( $\Delta E_{\text{LUMO}}$ ) and HOMO and HOMO-1 ( $\Delta E_{\text{HOMO}}$ ) in rotational conformers (P-P, O-P, O-O) of **2Ac-P2Ph** dimer.



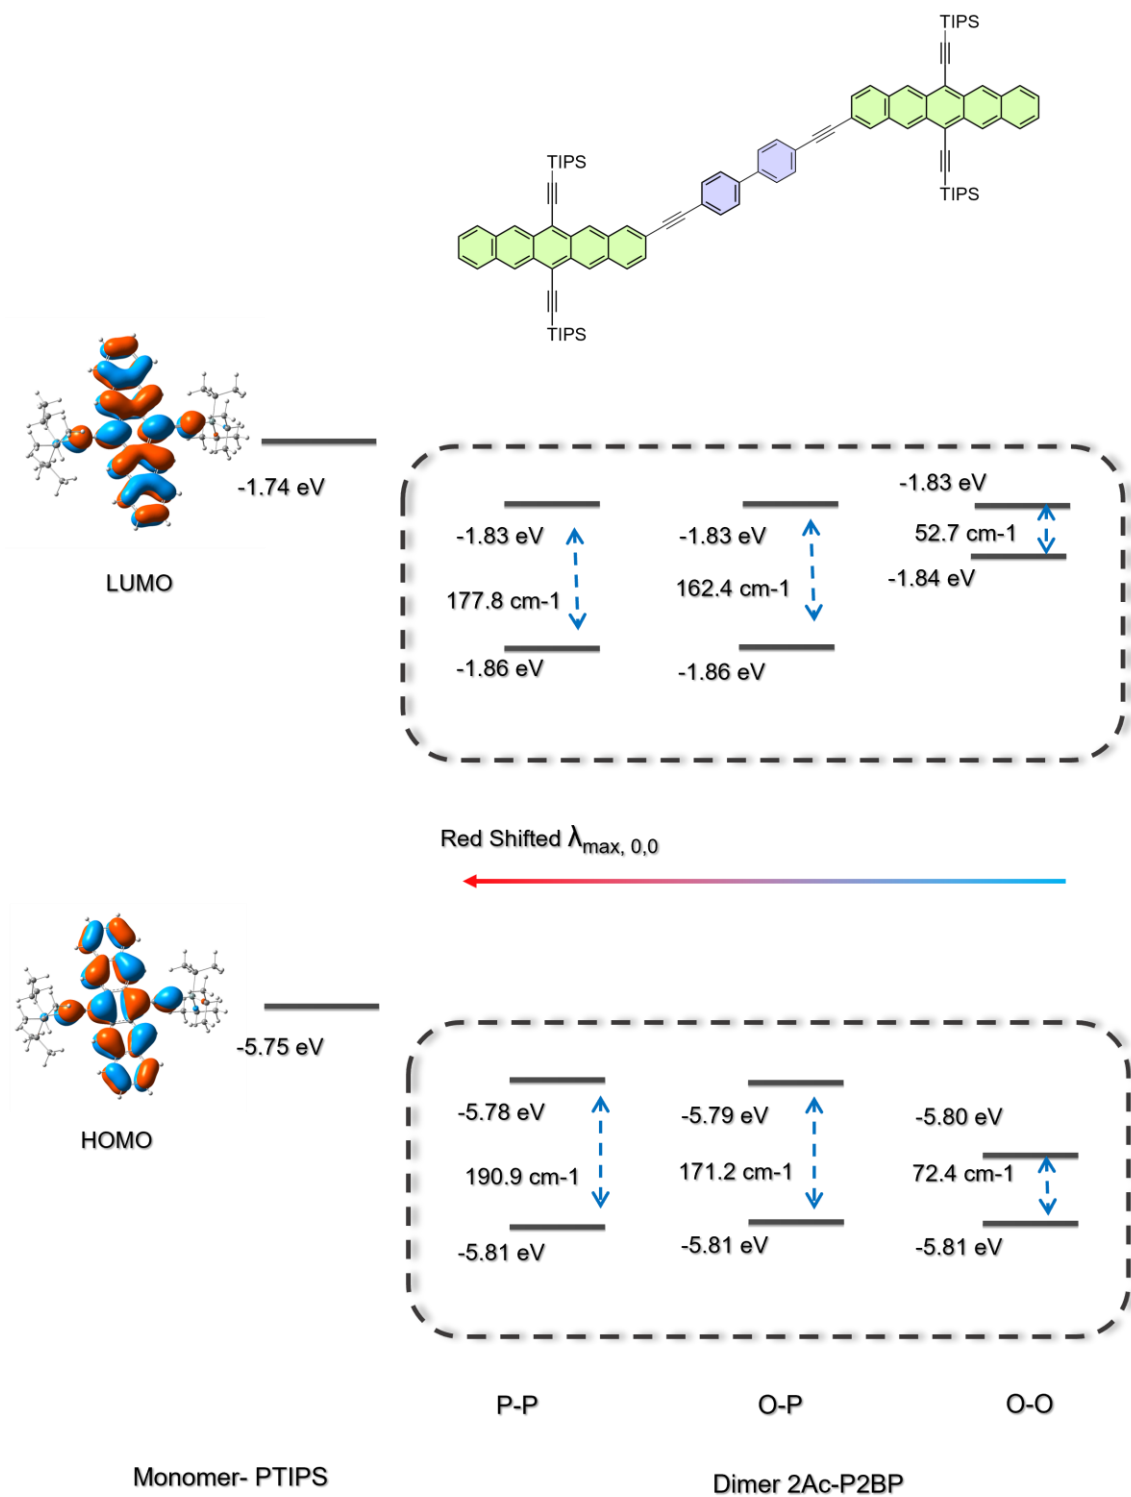

**Figure S3.2.6** Energy-level splitting between LUMO+1 and LUMO ( $\Delta E_{LUMO}$ ) and HOMO and HOMO-1 ( $\Delta E_{HOMO}$ ) in rotational conformers (P-P, O-P, O-O) of 2Ac-P2BP dimer.

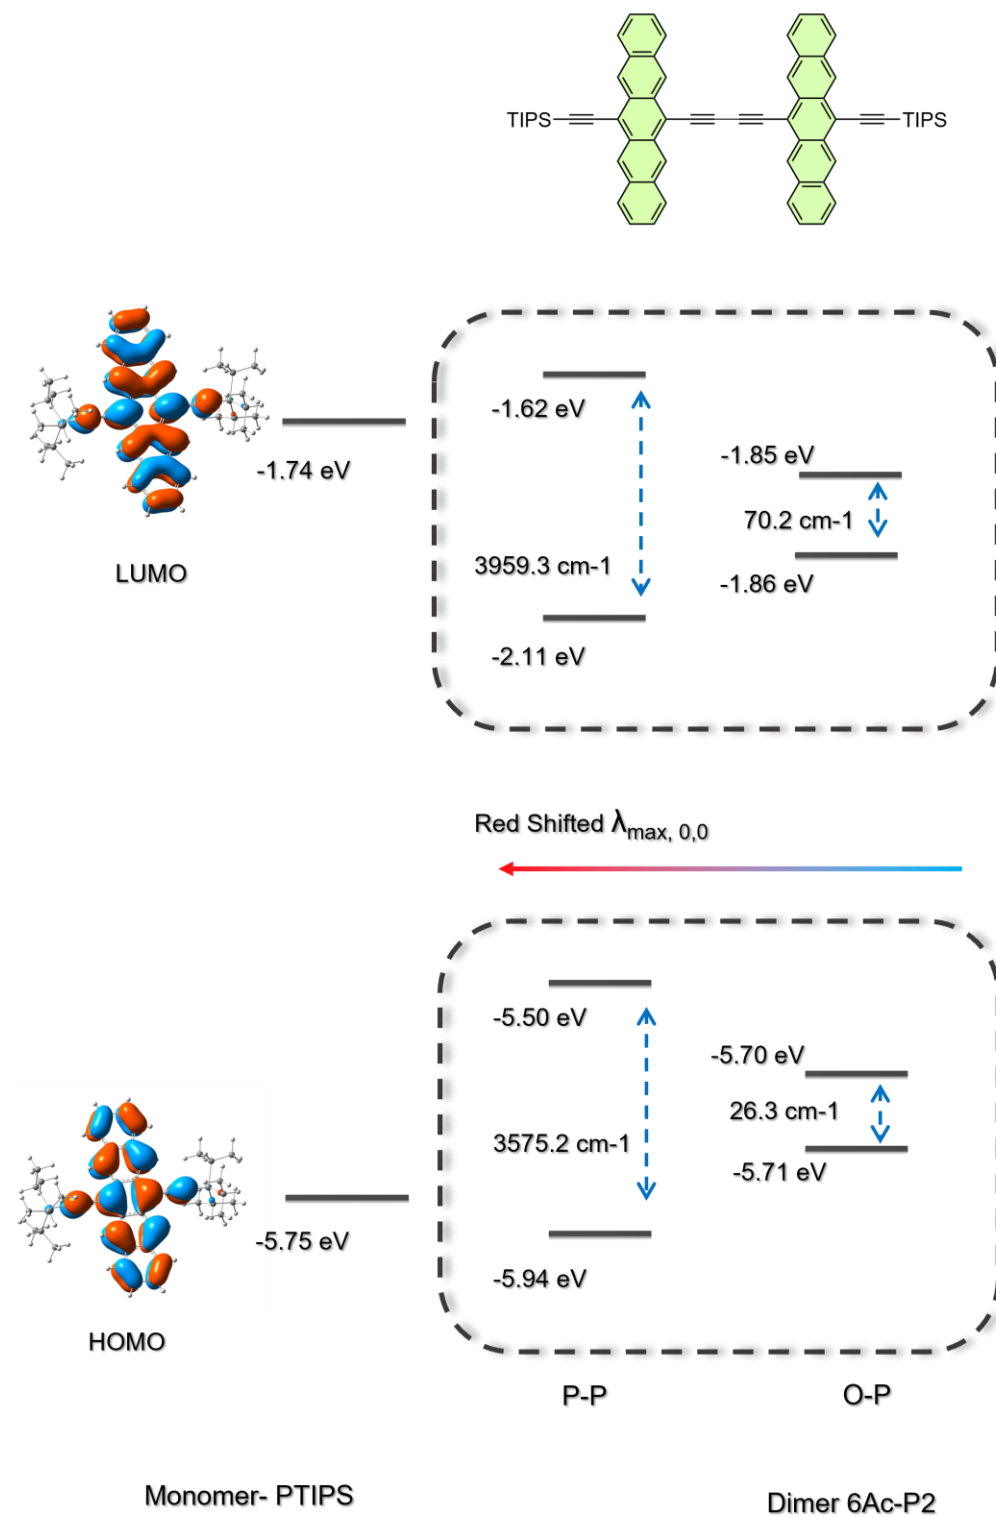

**Figure S3.2.7** Energy-level splitting between LUMO+1 and LUMO ( $\Delta E_{LUMO}$ ) and HOMO and HOMO-1 ( $\Delta E_{HOMO}$ ) in rotational conformers (P-P, O-P) of **6Ac-P2** dimer.

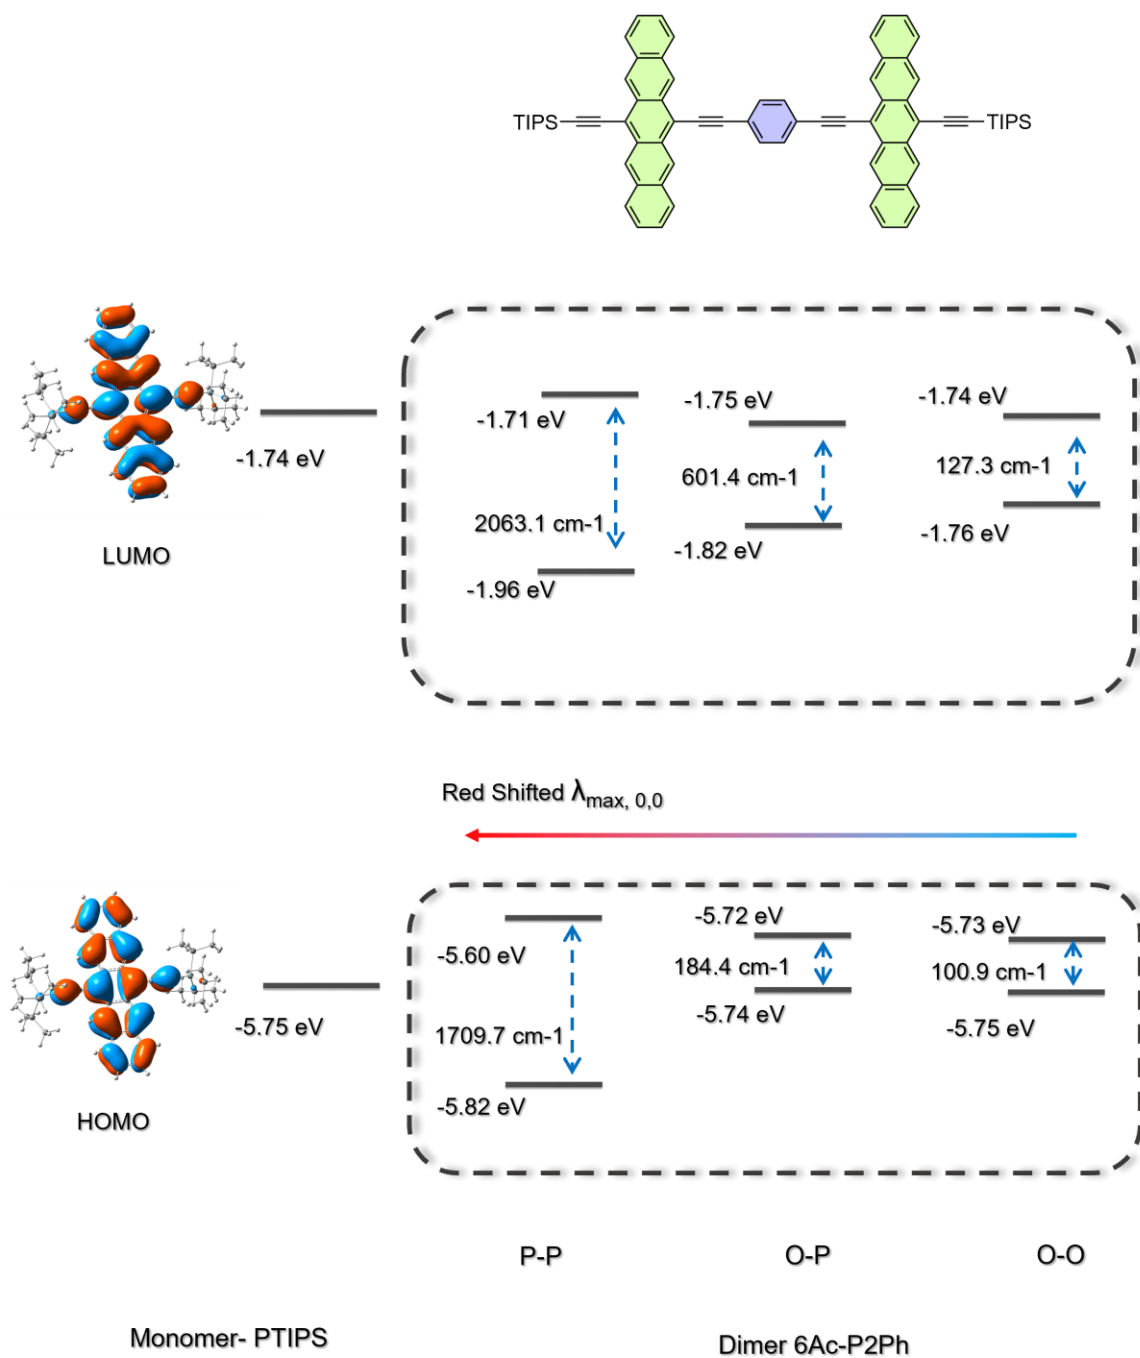

**Figure S3.2.8** Energy-level splitting between LUMO+1 and LUMO ( $\Delta E_{\text{LUMO}}$ ) and HOMO and HOMO-1 ( $\Delta E_{\text{HOMO}}$ ) in rotational conformers (P-P, O-P, O-O) of **6Ac-P2Ph** dimer.

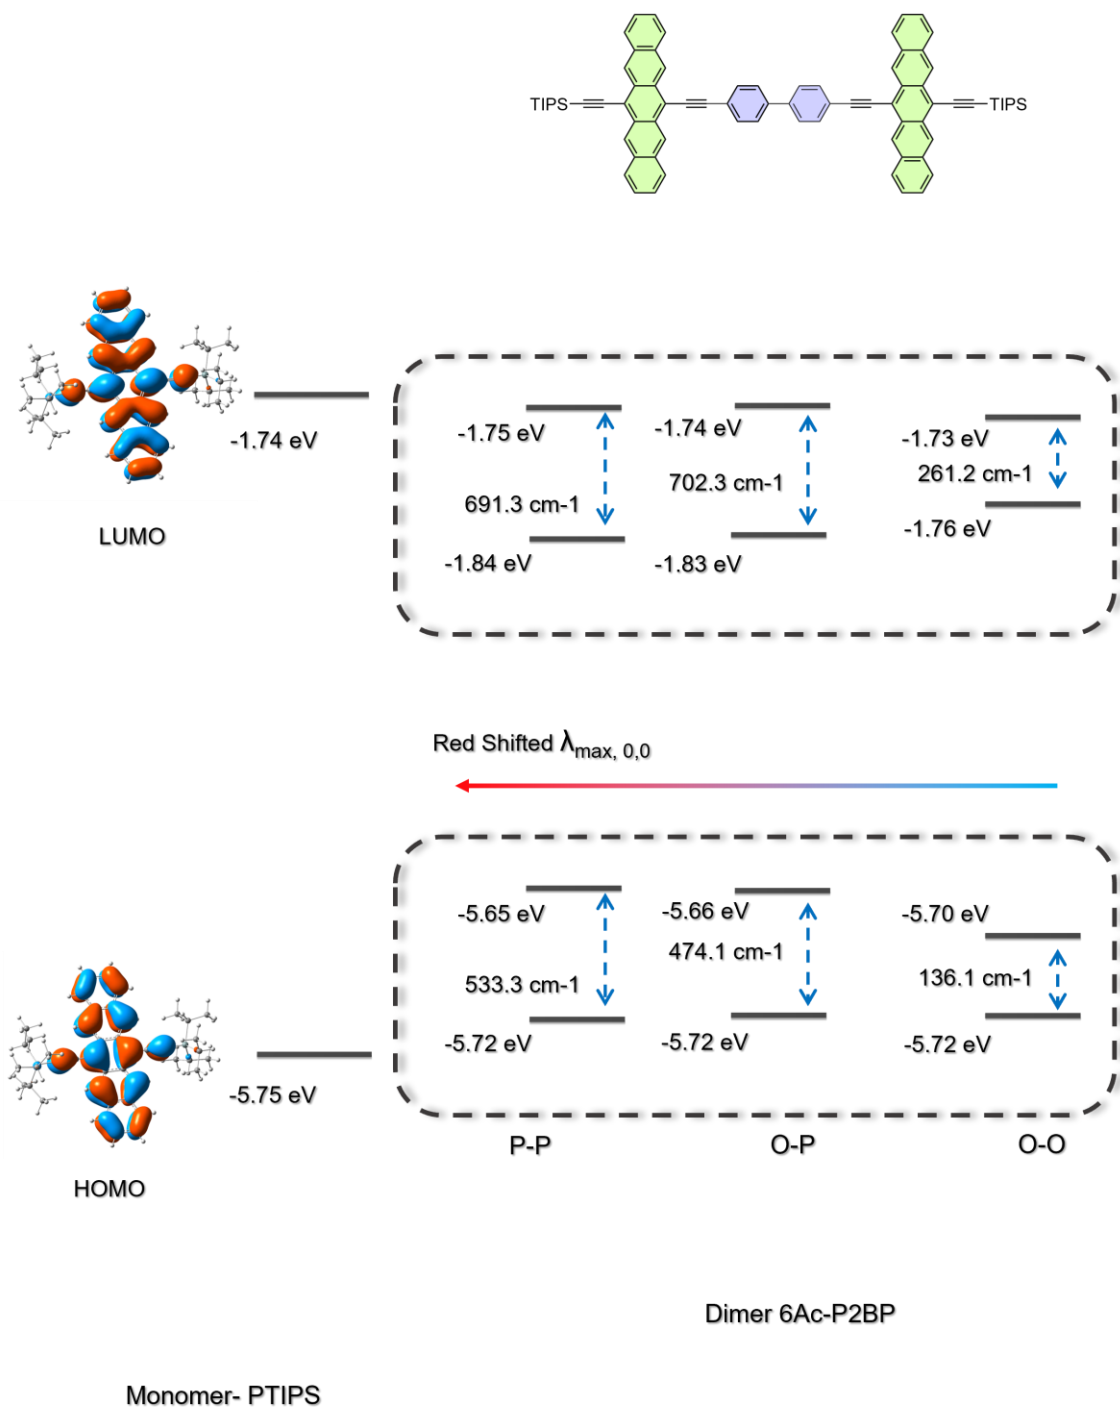

**Figure S3.2.9** Energy-level splitting between LUMO+1 and LUMO ( $\Delta E_{\text{LUMO}}$ ) and HOMO and HOMO-1 ( $\Delta E_{\text{HOMO}}$ ) in rotational conformers (P-P, O-P, O-O) of **6Ac-P2BP** dimer.

### 3.3. Ground State Optimised Geometries

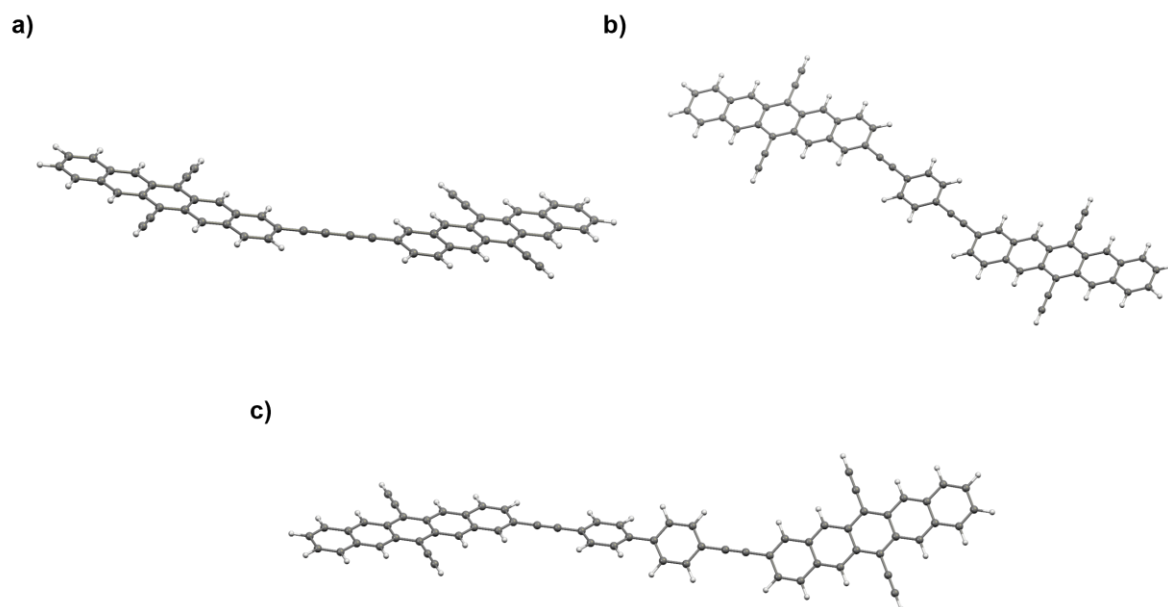

**Figure S3.3.1.** Ground state optimised geometries of **a) 2Ac-P2**, **b) 2Ac-P2Ph** and **c) 2Ac-P2BP**. 2Ac-P2 and 2Ac-P2Ph are completely planar but 2Ac-P2BP has a twist of  $37^\circ$  because of the biphenyl moiety.

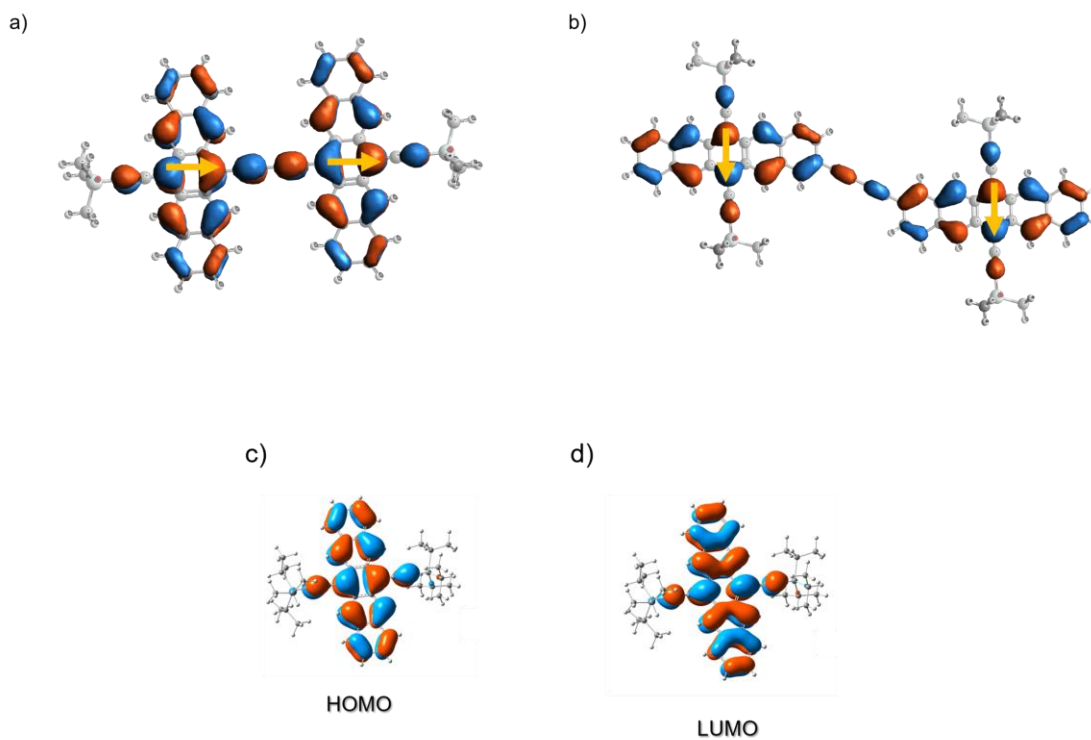

**Figure S3.3.2.** a) b) Alignment of  $S_0 \rightarrow S_1$  transition dipole moment in 6,6'-linked and 2,2'-linked pentacene dimers giving rise to head to tail J type and slipped parallel H type coupling. c) d) HOMO and LUMO of P-TIPS showing the orbital density at both 6 and 2 carbon centres.

### 3.4. Triplet Density and Molecular Orbitals

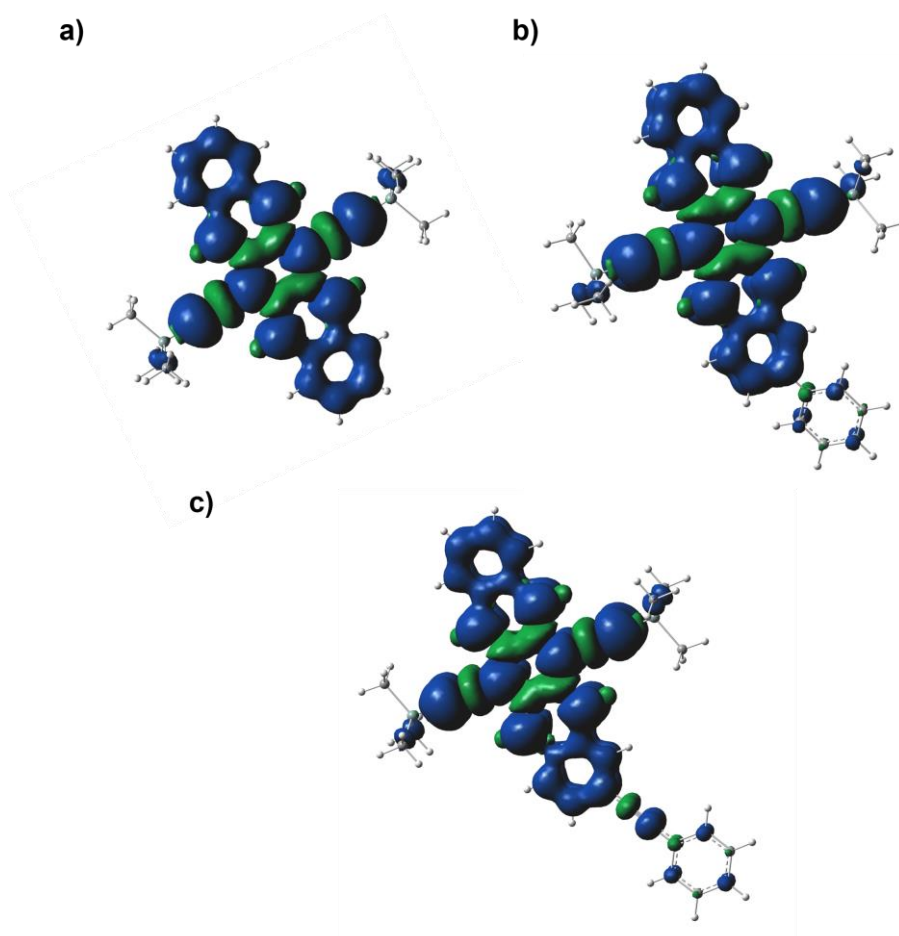

**Figure S3.4.1.** Triplet spin density distribution in a) PTIPS, b) 2-PTIPS-Ph and c) 2Ac-PTIPS-Ph.

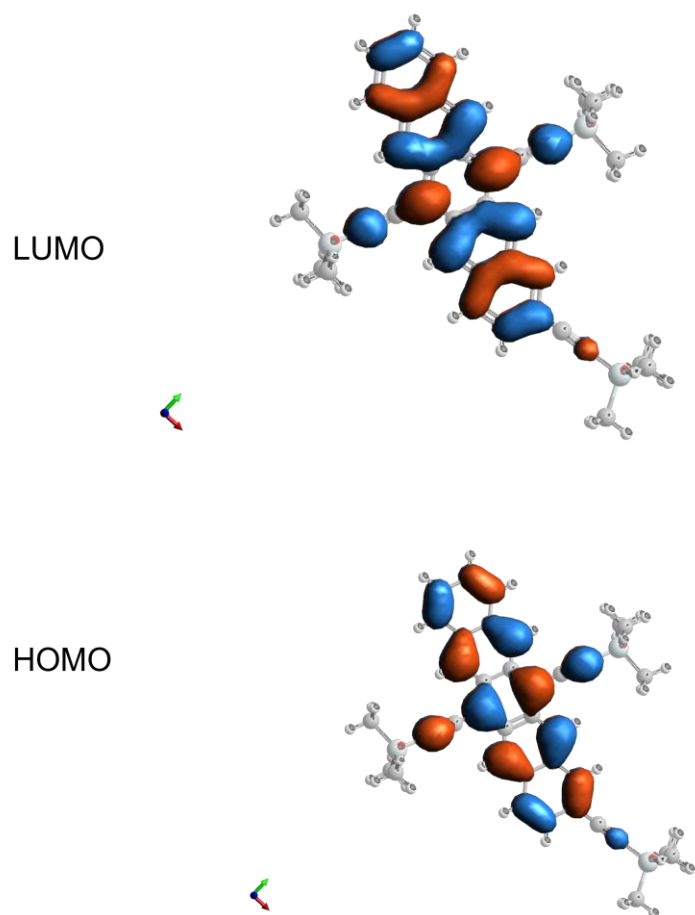

**Figure S3.4.2.** Frontier molecular orbitals of **2Ac-PTIPS**.



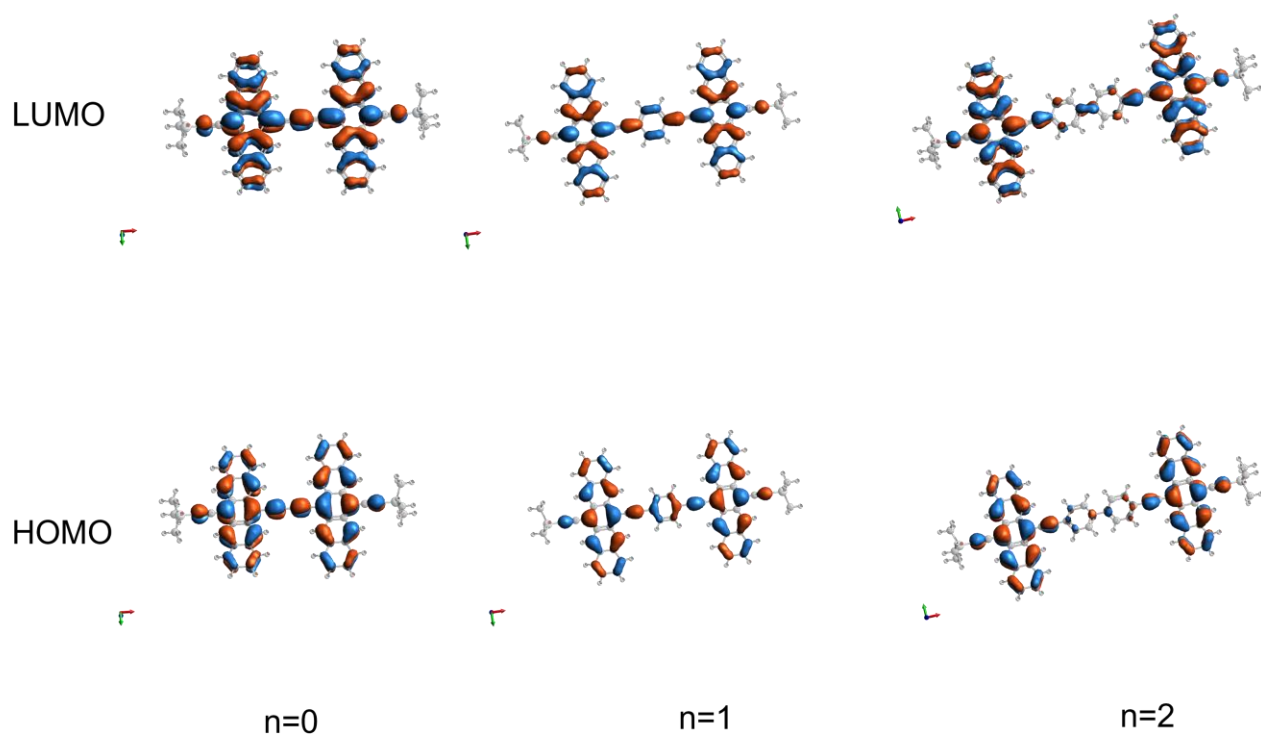

**Figure S3.4.3.** Frontier molecular orbitals of **6Ac-P2**, **6Ac-P2Ph** and **6Ac-P2BP**.

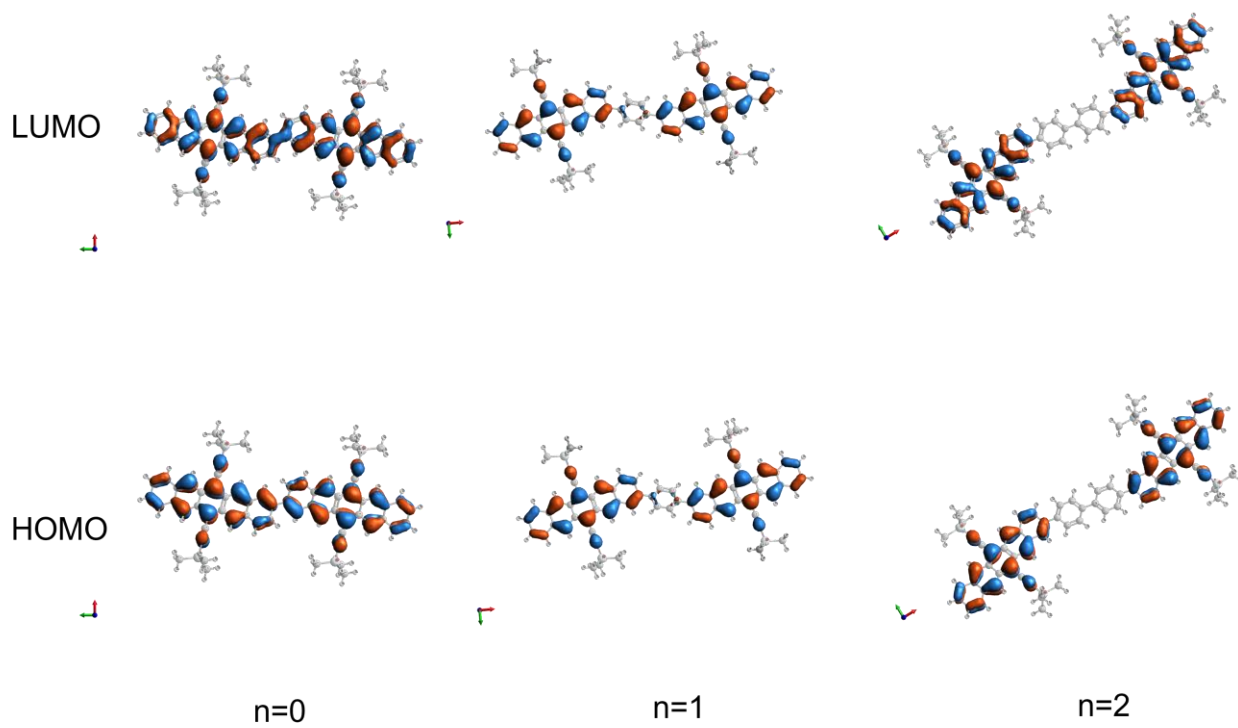

**Figure S3.4.4.** Frontier molecular orbitals of **2-P2**, **2-P2Ph** and **2-P2BP**.

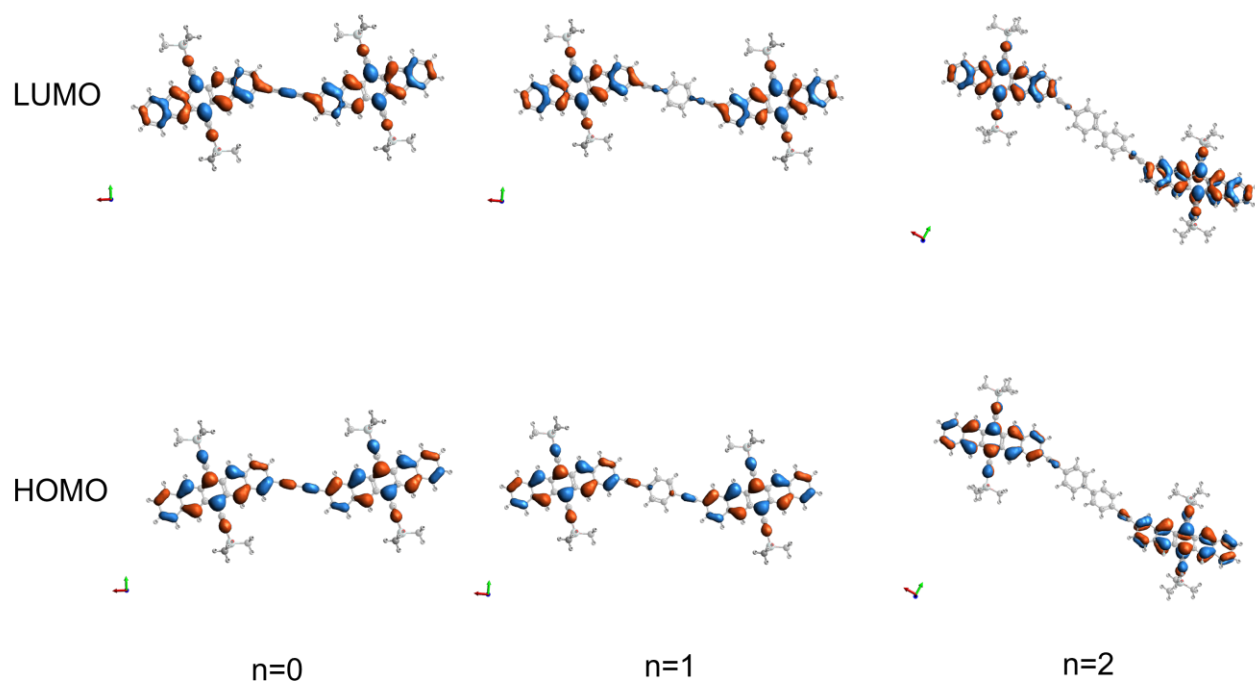

**Figure S3.4.5.** Frontier molecular orbitals of 2Ac-P2, 2Ac-P2Ph and 2Ac-P2BP.

## 4.1. Steady State Measurements

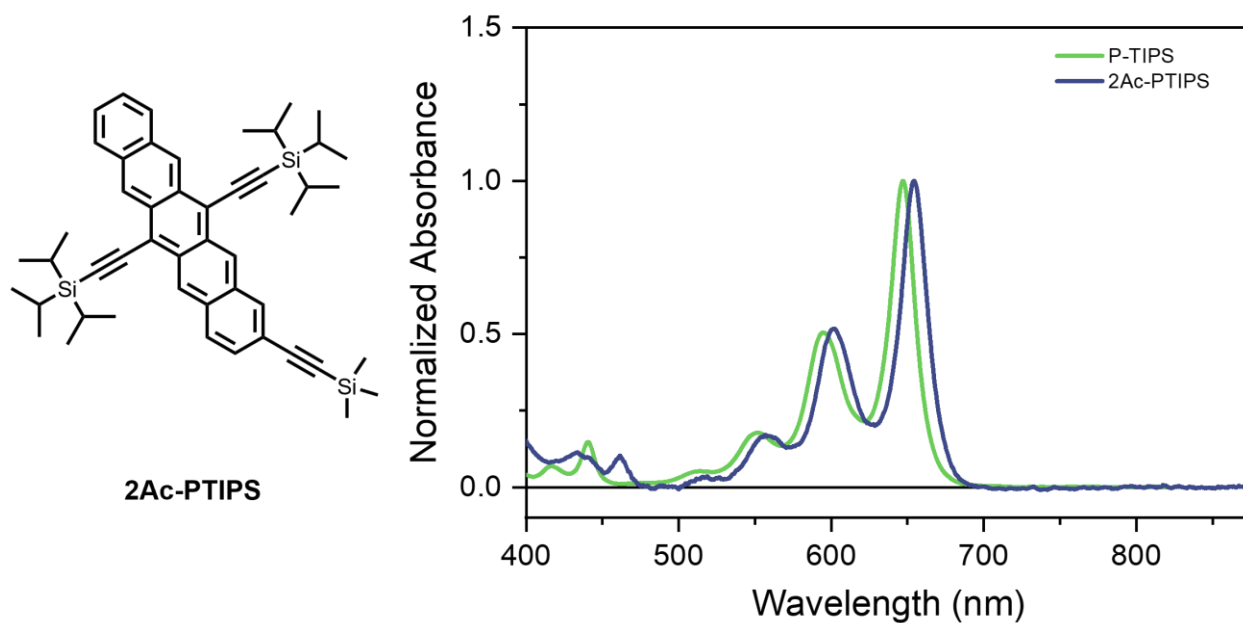

**Figure S4.1.1.** Structure (left) and steady state absorption (right) of reference monomer **2Ac-PTIPS** in comparison to **P-TIPS** monomer.

| Compound  |     | $\lambda_{\max, 0-0}$ (nm) <sup>a</sup> |
|-----------|-----|-----------------------------------------|
| PTIPS     |     | 647                                     |
| 2Ac-PTIPS |     | 654                                     |
| 6Ac-P     | n=0 | 749                                     |
|           | n=1 | 679                                     |
|           | n=2 | 667                                     |
| 2-P       | n=0 | 662                                     |
|           | n=1 | 657                                     |
|           | n=2 | 657                                     |
| 2Ac-P     | n=0 | 662                                     |
|           | n=1 | 657                                     |
|           | n=2 | 657                                     |

**Table S4.1.1.** Positions and widths of 0–0 absorption peaks of 6Ac-P, 2-P and 2Ac-P dimers.

<sup>a</sup>Estimated from the second derivative analysis.

## 4.2. Transient Absorption Measurements

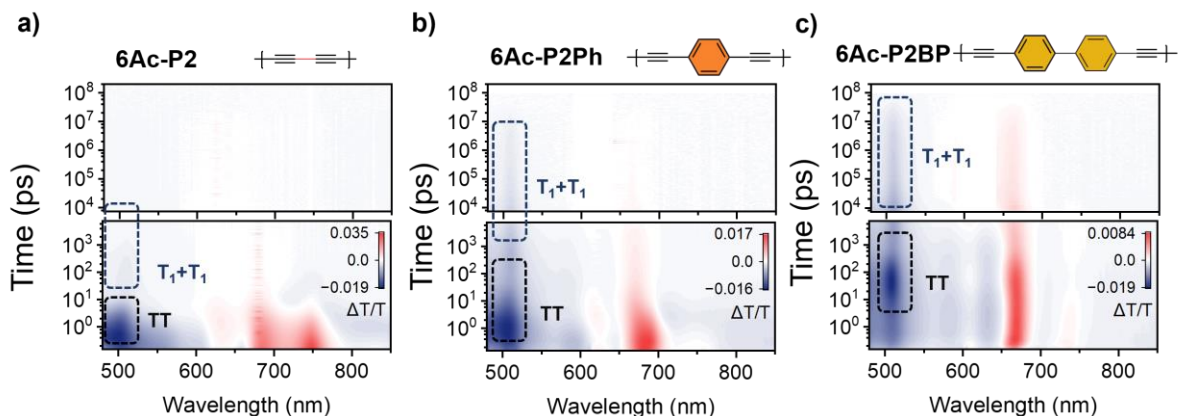

**Figure S4.2.1.** fs-nsTA contour maps of (a) **6Ac-P2**, (b) **6Ac-P2Ph**, and (c) **6Ac-P2BP** in chlorobenzene after photoexcitation at 0-1/0-2 vibronic absorption bands (fsTA - 680 nm (6Ac-P2), 620 nm (6Ac-P2Ph), 605 nm (6Ac-P2BP); nsTA - 620 nm).

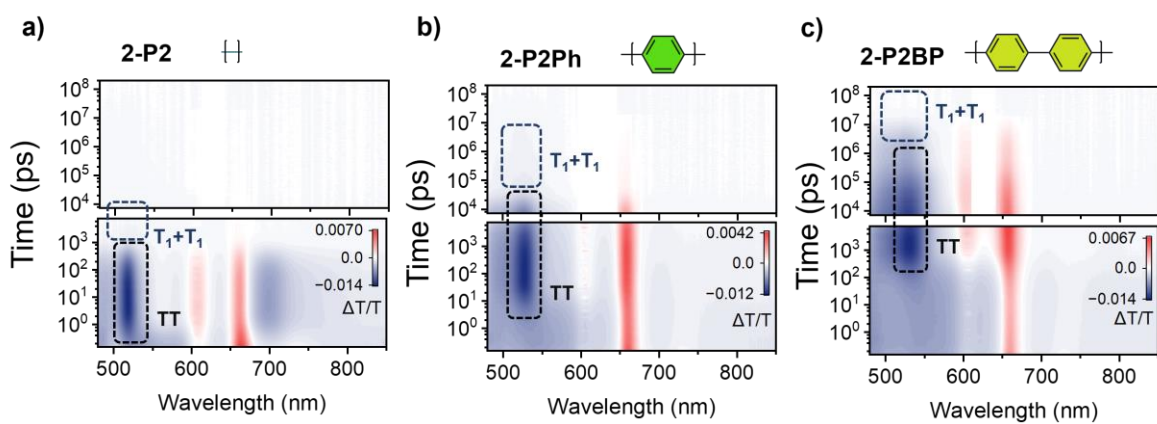

**Figure S4.2.2.** fs-nsTA contour maps of (a) **2-P2**, (b) **2-P2Ph**, and (c) **2-P2BP** in chlorobenzene after photoexcitation at 0-1 vibronic absorption bands (fsTA - 605 nm, nsTA - 620 nm).

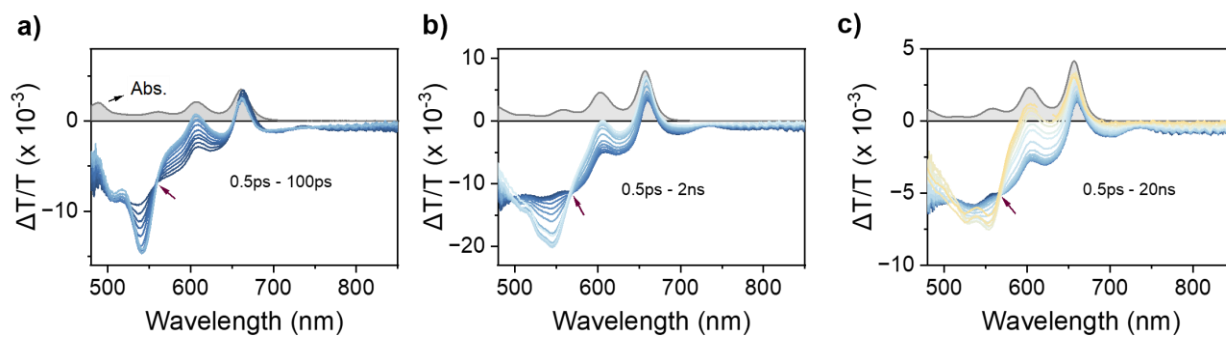

**Figure S4.2.3.** Isosbestic points in fsTA of (a) **2Ac-P2**, (b) **2Ac-P2Ph**, and (c) **2Ac-P2BP** indicated with maroon arrow. This implies direct population transfer between  $S_1$  and  ${}^1(TT)$  states during the mentioned time windows.

| <b>6Ac-P</b>                                                                                                                                                                                                                                                                                                                                                                                                                                                                                                                                                                                                                                    |  |                                                                                                                                                                                                                                                                                                                                                                                                                                                                                                                                                                           |  |                                                                                                                                                                                                                                                                                                                                                                                                                                                           |
|-------------------------------------------------------------------------------------------------------------------------------------------------------------------------------------------------------------------------------------------------------------------------------------------------------------------------------------------------------------------------------------------------------------------------------------------------------------------------------------------------------------------------------------------------------------------------------------------------------------------------------------------------|--|---------------------------------------------------------------------------------------------------------------------------------------------------------------------------------------------------------------------------------------------------------------------------------------------------------------------------------------------------------------------------------------------------------------------------------------------------------------------------------------------------------------------------------------------------------------------------|--|-----------------------------------------------------------------------------------------------------------------------------------------------------------------------------------------------------------------------------------------------------------------------------------------------------------------------------------------------------------------------------------------------------------------------------------------------------------|
| <b>6Ac-P2</b>                                                                                                                                                                                                                                                                                                                                                                                                                                                                                                                                                                                                                                   |  | <b>6Ac-P2Ph</b>                                                                                                                                                                                                                                                                                                                                                                                                                                                                                                                                                           |  | <b>6Ac-P2BP</b>                                                                                                                                                                                                                                                                                                                                                                                                                                           |
| <ul style="list-style-type: none"> <li><b>Planar (no SF based on 750, 780 nm pump results):</b><br/>1.32 ps (<math>\pm 0.046</math>) (<math>S_1</math> lifetime or <math>^1(TT)</math> recombination)</li> <li><b>Twisted (no SF, reflected as <math>S_1</math> spectra's decay):</b><br/>650-800 ps / 5.5 ns (<math>\pm 0.097</math>)</li> <li><b>Twisted (SF):</b><br/>IRF limited <math>^1(TT)</math> formation/ 4ps (<math>\pm 0.086</math>) <math>^1(TT)</math> recombination) / 77 ns (<math>\pm 1.7</math>) (<math>^m(TT)</math> recombination / spin evolution) / 8 <math>\mu</math>s (<math>\pm 0.28</math>) (free triplet)</li> </ul> |  | <ul style="list-style-type: none"> <li><b>Planar (SF):</b> <ul style="list-style-type: none"> <li>0.3 ps (<math>\pm 0.1</math>) rise, <math>^1(TT)</math> formation</li> <li>3.1 ps (<math>\pm 0.012</math>) decay, (<math>^1(TT)</math> recombination or formation not clear)</li> <li>16.6 ps (<math>\pm 0.044</math>) (<math>^1(TT)</math> recombination)</li> <li>4-8 ns (<math>S_1</math> decay)</li> <li>95-120 ns (<math>^m(TT)</math> recombination / spin evolution)</li> <li>23 <math>\mu</math>s (<math>\pm 0.23</math>) (free triplet)</li> </ul> </li> </ul> |  | <ul style="list-style-type: none"> <li><b>Twisted (SF):</b> <ul style="list-style-type: none"> <li>15 ps rise (<math>\pm 1.1</math>) (<math>^1(TT)</math> formation)</li> <li>239 ps <math>^1(TT)</math> (<math>\pm 10.2</math>) recombination</li> <li>13.4 ns (<math>S_1</math> decay)</li> <li>188 ns (<math>^m(TT)</math> recombination / spin evolution)</li> <li>26 <math>\mu</math>s (<math>\pm 0.22</math>) (free triplet)</li> </ul> </li> </ul> |
| <b>2-P</b>                                                                                                                                                                                                                                                                                                                                                                                                                                                                                                                                                                                                                                      |  |                                                                                                                                                                                                                                                                                                                                                                                                                                                                                                                                                                           |  |                                                                                                                                                                                                                                                                                                                                                                                                                                                           |
| <b>2-P2 (BP0)</b>                                                                                                                                                                                                                                                                                                                                                                                                                                                                                                                                                                                                                               |  | <b>2-P2Ph (BP1)</b>                                                                                                                                                                                                                                                                                                                                                                                                                                                                                                                                                       |  | <b>2-P2BP (BP2)</b>                                                                                                                                                                                                                                                                                                                                                                                                                                       |
| <ul style="list-style-type: none"> <li><b>Twisted (SF):</b> <ul style="list-style-type: none"> <li>0.93 ps (<math>\pm 0.05</math>) (<math>^1(TT)</math> formation)</li> <li>420-460 ps (<math>^1(TT)</math> recombination)</li> <li>15.0 ns (<math>\pm 0.3</math>) (<math>S_1</math> decay)</li> <li>19 <math>\mu</math>s (<math>\pm 2.3</math>) (free triplet or triplet)</li> </ul> </li> </ul>                                                                                                                                                                                                                                               |  | <ul style="list-style-type: none"> <li><b>Twisted (SF):</b> <ul style="list-style-type: none"> <li>13 ps (<math>\pm 0.3</math>) (<math>^1(TT)</math> formation)</li> <li>14.3 ns (<math>\pm 0.9</math>) (<math>^1(TT)</math> recombination)</li> <li>228 ns (<math>\pm 5.1</math>) (<math>^m(TT)</math> recombination / spin evolution)</li> <li>24.7 <math>\mu</math>s (<math>\pm 1.7</math>) (free triplet or triplet)</li> </ul> </li> </ul>                                                                                                                           |  | <ul style="list-style-type: none"> <li><b>Twisted (SF):</b> <ul style="list-style-type: none"> <li>323 ps (<math>\pm 5.8</math>) (<math>^1(TT)</math> formation)</li> <li>43 ns (<math>\pm 9.4</math>) (<math>^1(TT)</math> recombination)</li> <li>262 ns (<math>\pm 8.5</math>) (<math>^m(TT)</math> recombination / spin evolution)</li> <li>19.9 <math>\mu</math>s (<math>\pm 0.7</math>) (free triplet or triplet)</li> </ul> </li> </ul>            |
| <b>2Ac-P</b>                                                                                                                                                                                                                                                                                                                                                                                                                                                                                                                                                                                                                                    |  |                                                                                                                                                                                                                                                                                                                                                                                                                                                                                                                                                                           |  |                                                                                                                                                                                                                                                                                                                                                                                                                                                           |
| <b>2Ac-P2</b>                                                                                                                                                                                                                                                                                                                                                                                                                                                                                                                                                                                                                                   |  | <b>2Ac-P2Ph</b>                                                                                                                                                                                                                                                                                                                                                                                                                                                                                                                                                           |  | <b>2Ac-P2BP</b>                                                                                                                                                                                                                                                                                                                                                                                                                                           |
| <ul style="list-style-type: none"> <li><b>Planar (SF):</b> <ul style="list-style-type: none"> <li>2.7 ps (<math>\pm 0.25</math>) (<math>^1(TT)</math> formation)</li> <li>20 ps (<math>\pm 1.0</math>) (<math>^1(TT)</math> formation)</li> <li>860 ps (<math>\pm 10.2</math>) (<math>^1(TT)</math> recombination)</li> <li>15.4 ns (<math>\pm 0.26</math>) (<math>S_1</math> decay)</li> <li>26.5 <math>\mu</math>s (<math>\pm 4.7</math>) (free triplet or triplet)</li> </ul> </li> </ul>                                                                                                                                                    |  | <ul style="list-style-type: none"> <li><b>Planar (SF):</b> <ul style="list-style-type: none"> <li>84 ps (<math>\pm 3.6</math>) (<math>^1(TT)</math> formation)</li> <li>18.2 ns (<math>\pm 1.5</math>) (<math>^1(TT)</math> recombination)</li> <li>122.5 ns (<math>\pm 2.3</math>) (<math>^m(TT)</math> recombination / spin evolution)</li> <li>28.0 <math>\mu</math>s (<math>\pm 3.6</math>) (free triplet or triplet)</li> </ul> </li> </ul>                                                                                                                          |  | <ul style="list-style-type: none"> <li><b>Twisted (SF):</b> <ul style="list-style-type: none"> <li>2.0 ns (<math>\pm 0.04</math>) (<math>^1(TT)</math> formation)</li> <li>48.8 ns (<math>\pm 3.0</math>) (<math>^1(TT)</math> recombination)</li> <li>27.8 <math>\mu</math>s (<math>\pm 1.9</math>) (free triplet or triplet)</li> </ul> </li> </ul>                                                                                                     |

**Table S4.2.1.** Multiexponential fitting results.  $S_1$  decay refers to decay of the singlet excited state either via iSF or directly back to ground state.  $^mTT$  recombination or spin evolution encompasses the full range of spin relaxation processes within the  $TT$  manifold since these states are indistinguishable in our optical measurement.



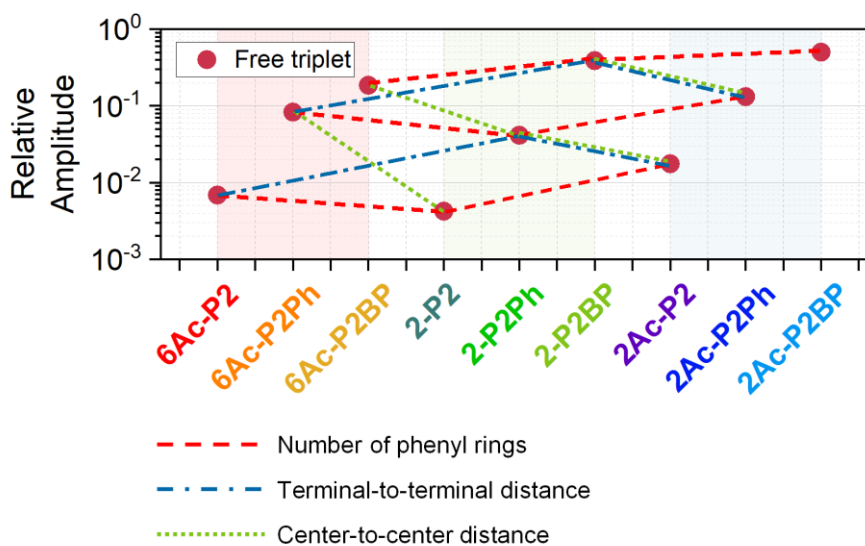

**Figure S4.2.4.** Comparison of relative amplitudes of free triplet decay in the kinetics of the three dimer classes based on the various interpretations of pentacene-to-pentacene interchromophore distances. Dimers having similar interpentacene distances are connected with dashed lines (number of phenyl rings: red, terminal-to-terminal: blue and center-to-center: green). Trends depend strongly on the interpretation highlighting the limitations of a simple chromophore-linker-chromophore based analysis.

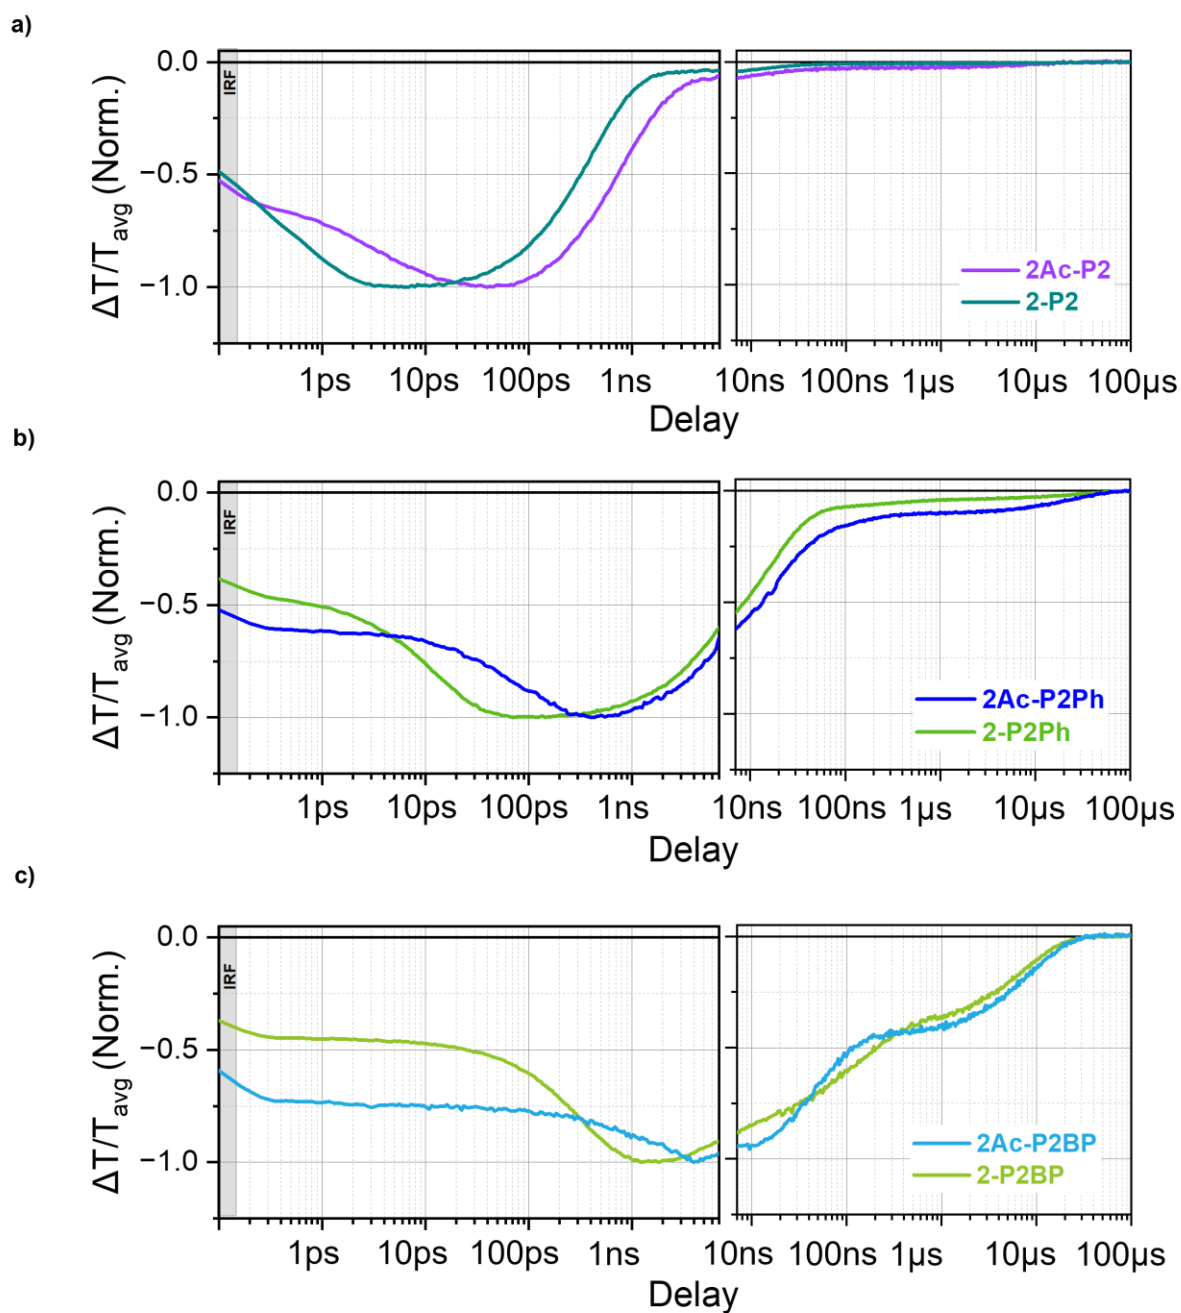

**Figure S4.2.5.** Comparison of normalized  $^1(\text{TT})$  dynamics between 2Ac-P and 2-P dimers with a)  $n=0$  b)  $n=1$  and c)  $n=2$  oligophenylene linkage after photoexcitation at respective 0-1 vibronic absorption bands.

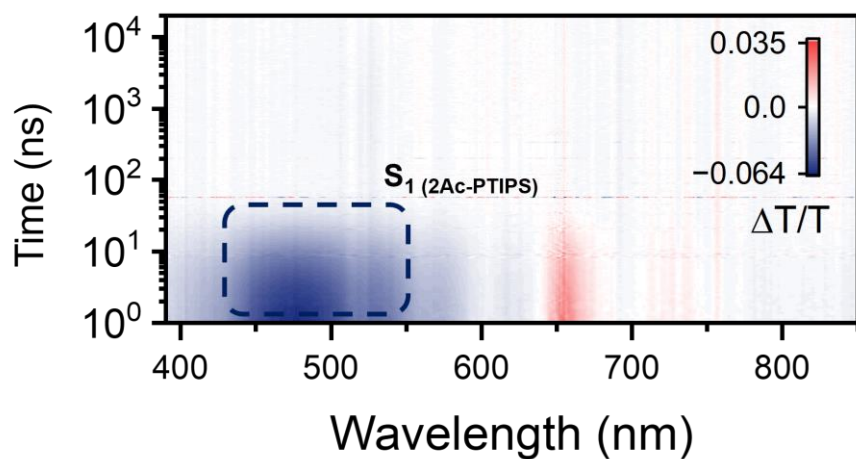

**Figure S4.2.6.** nsTA contour map of **2Ac-PTIPS** in chlorobenzene after photoexcitation at 0-1 vibronic absorption bands (620 nm).

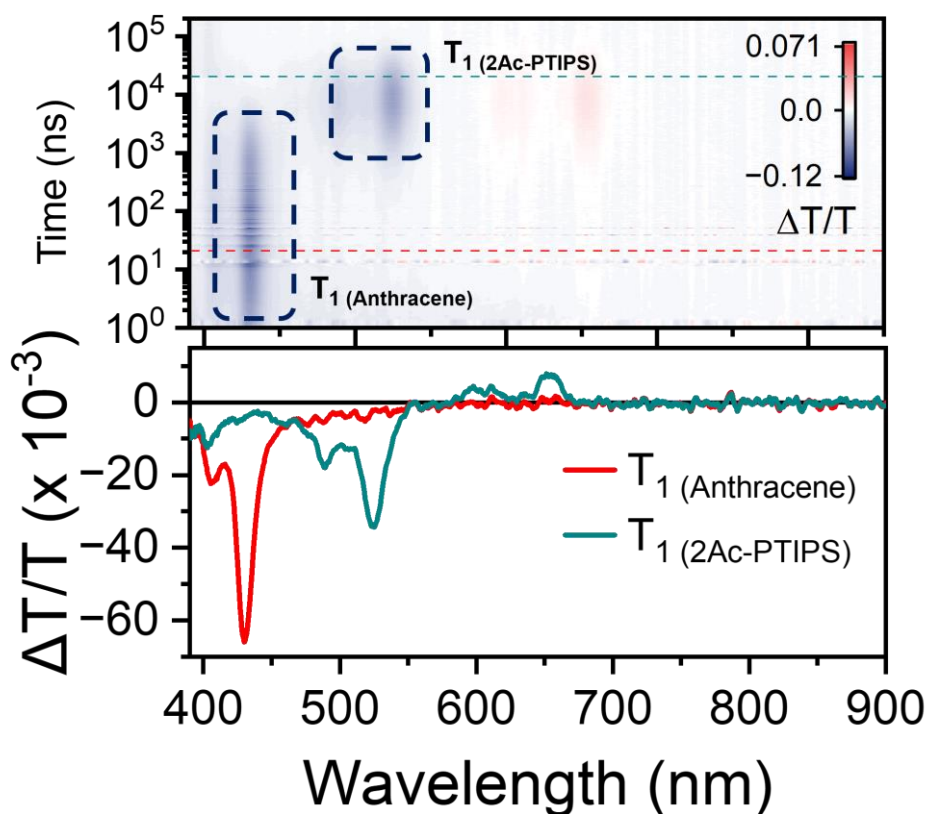

**Figure S4.2.7.** nsTA results demonstrating triplet sensitisation of **2Ac-PTIPS** using anthracene as triplet sensitizer in chlorobenzene after photoexcitation at 360 nm. Top and bottom panels show contour maps and TA spectra at selected delay times, respectively.

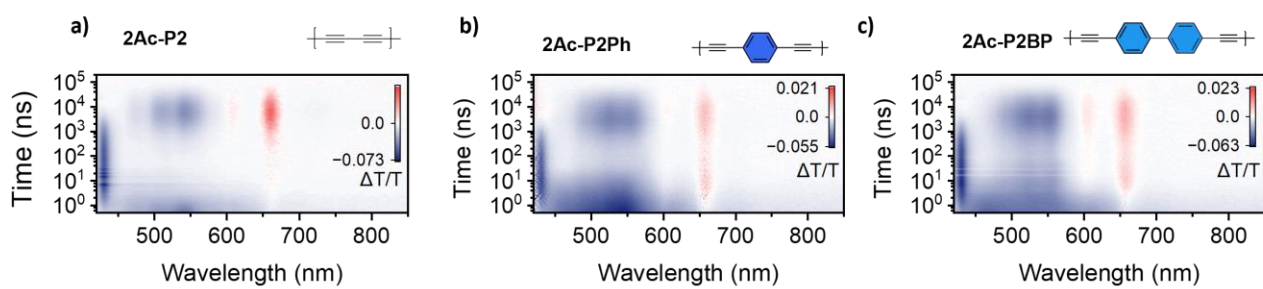

**Figure S4.2.8.** nsTA results demonstrating triplet sensitisation of **a) 2Ac-P2**, **b) 2Ac-P2Ph** and **c) 2Ac-P2BP** using anthracene as triplet sensitiser in chlorobenzene after photoexcitation at 360 nm.

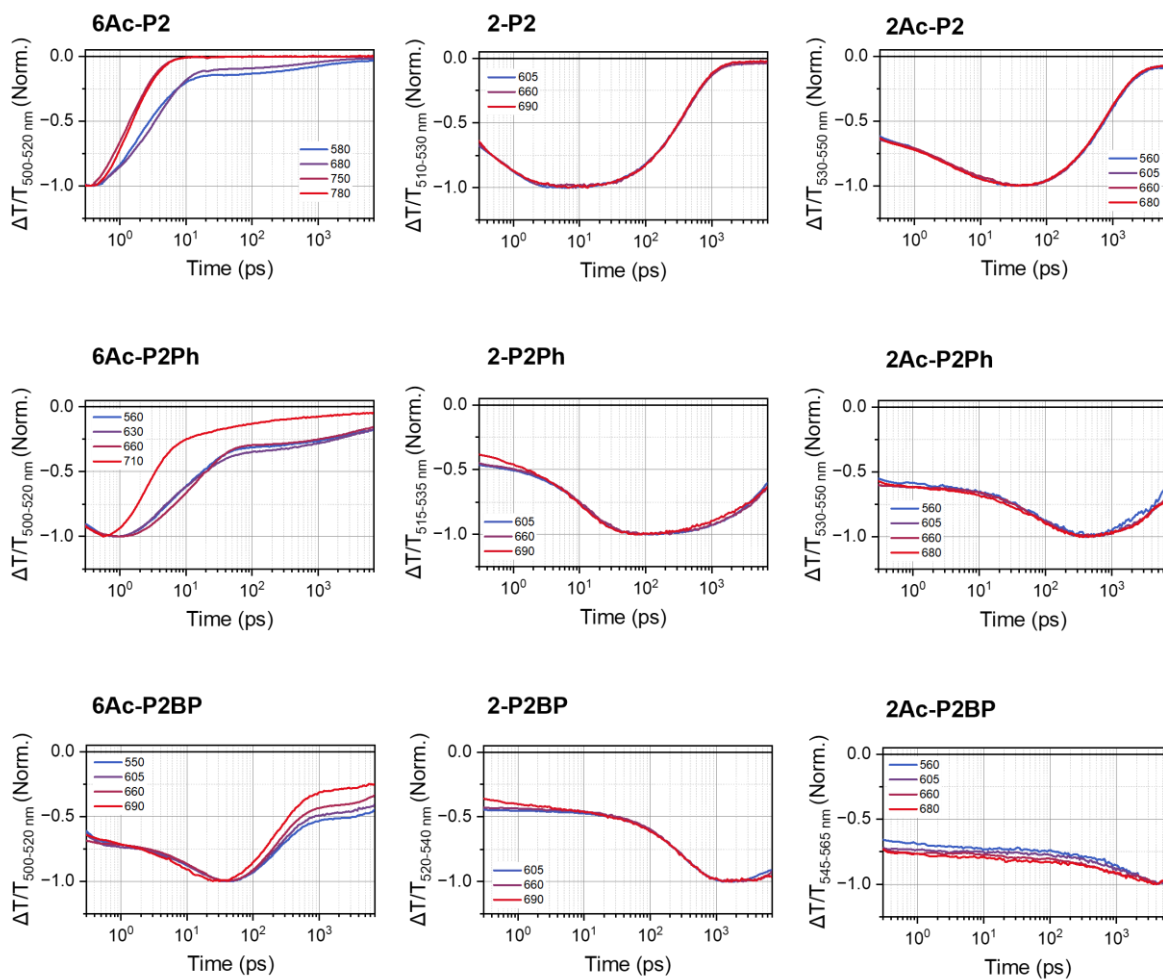

**Figure S4.2.9.** Heterogeneous iSF: Comparison of normalized kinetics in TT PIA regions among **6Ac-P** (left), **2-P** (middle) and **2Ac-P** (right) dimers at different excitation wavelengths. **6Ac-P** dimers exhibit strong excitation dependent iSF dynamics while both **2-P** and **2Ac-P** dimers exhibit iSF largely insensitive to excitation wavelength.

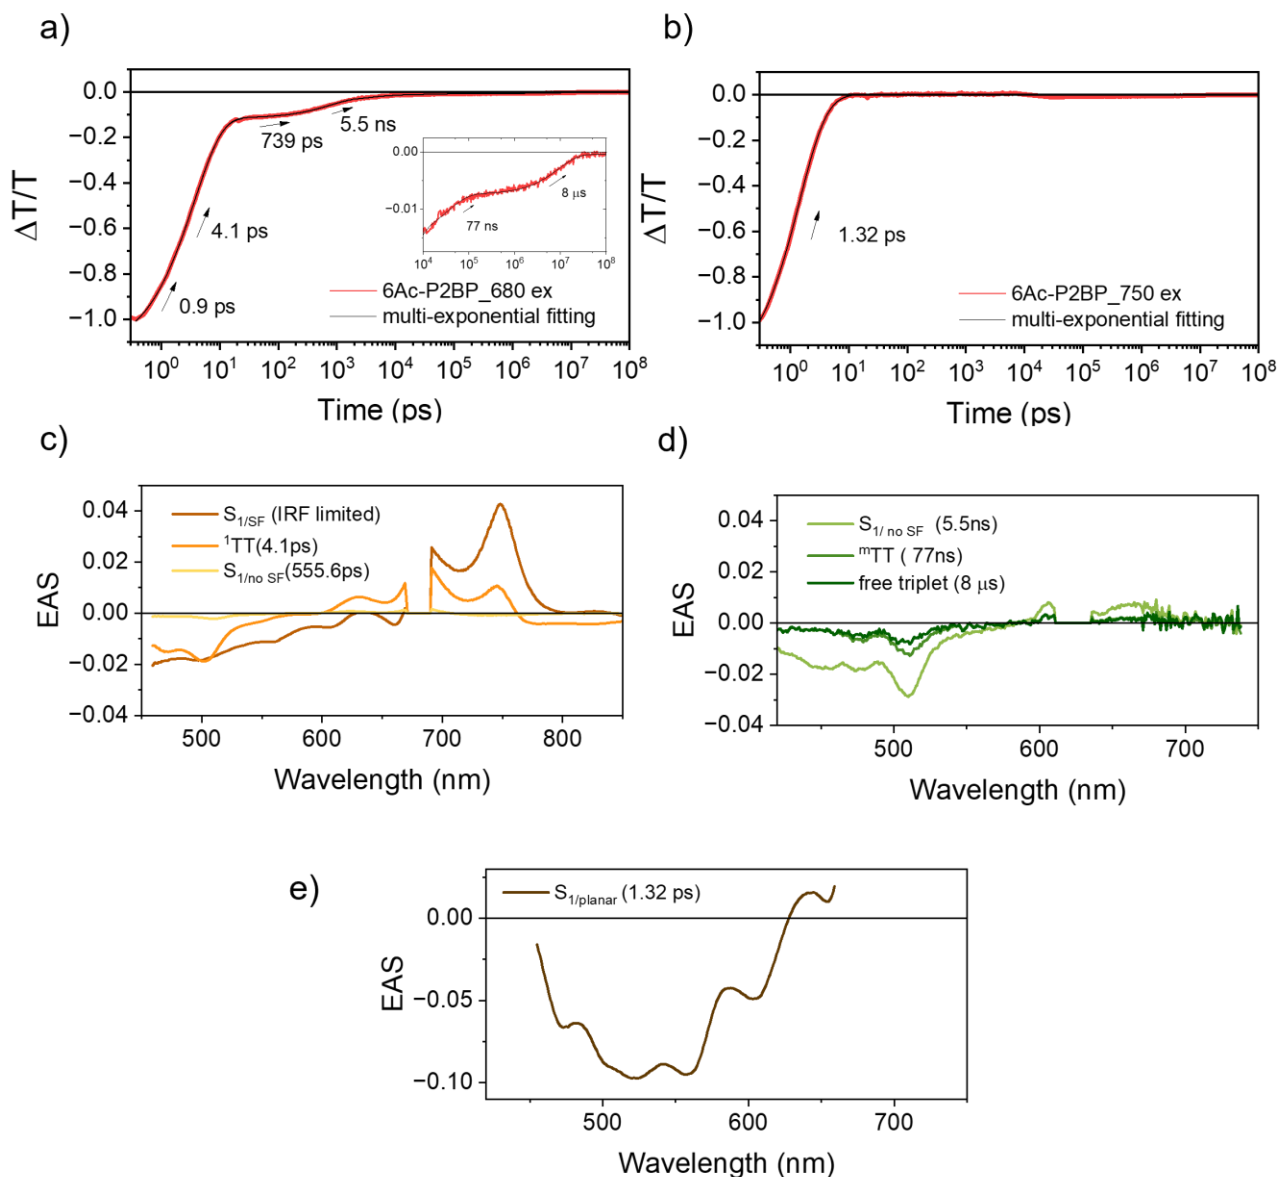

**Figure S4.2.10.** Kinetic analysis of (a)  ${}^1TT$  PIA region ( $\Delta T/T_{avg}$ ) with 680nm excitation in **6Ac-P2** and (b)  $S_1$  PIA region with 750nm excitation using multiexponential fit. (c) fsTA and (d) nsTA global analysis showing evolution associated spectra (EAS) with 680nm excitation. (e) EAS with 750nm excitation. For more detailed analysis of 6Ac-P2 dimers refer to J. Phys. Chem. Lett. 2022, 13, 5094–5100.

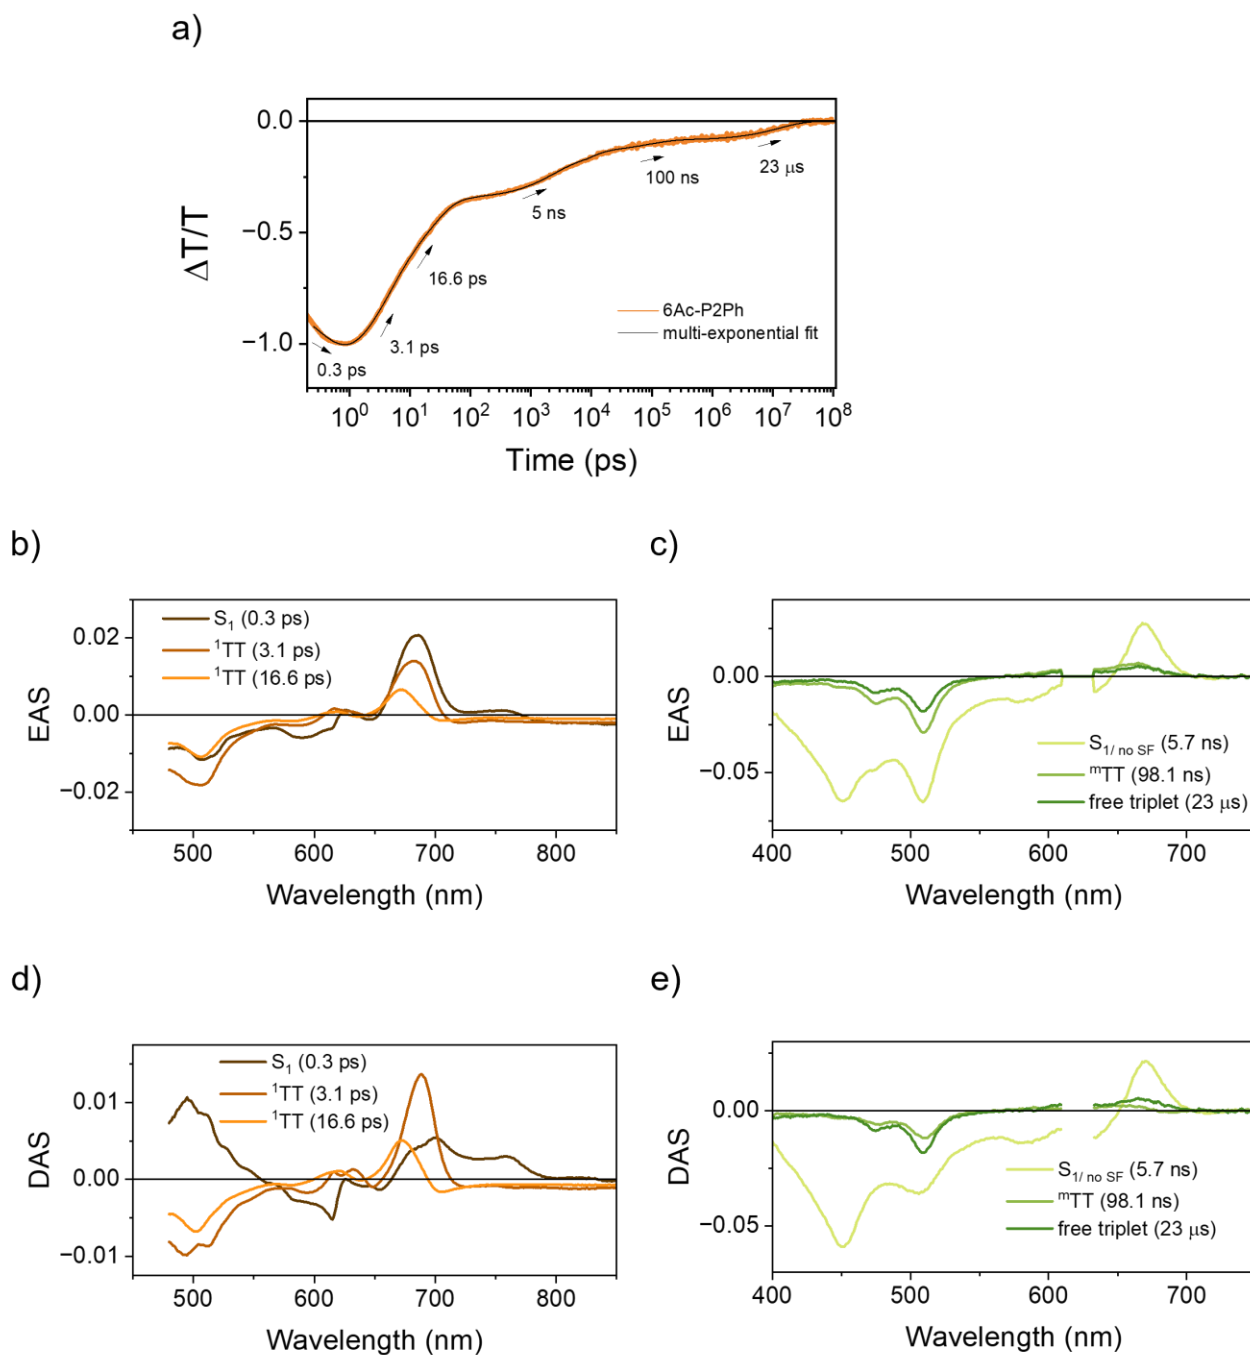

**Figure S4.2.11.** (a) Kinetic analysis of  $^1\text{TT}$  PIA region ( $\Delta T/T_{\text{avg}}$ ) in **6Ac-P2Ph** using multiexponential fit. (b) fsTA and (c) nsTA EAS from global analysis. (d) fsTA and (e) nsTA decay associated spectra (DAS) from global analysis.  $S_{1/\text{no SF}}$  corresponds to  $S_1$  subpopulation that does not undergo singlet fission. For more detailed analysis of 6Ac-P2Ph dimers refer to *J. Am. Chem. Soc.* 2023, 145, 20883–20896.

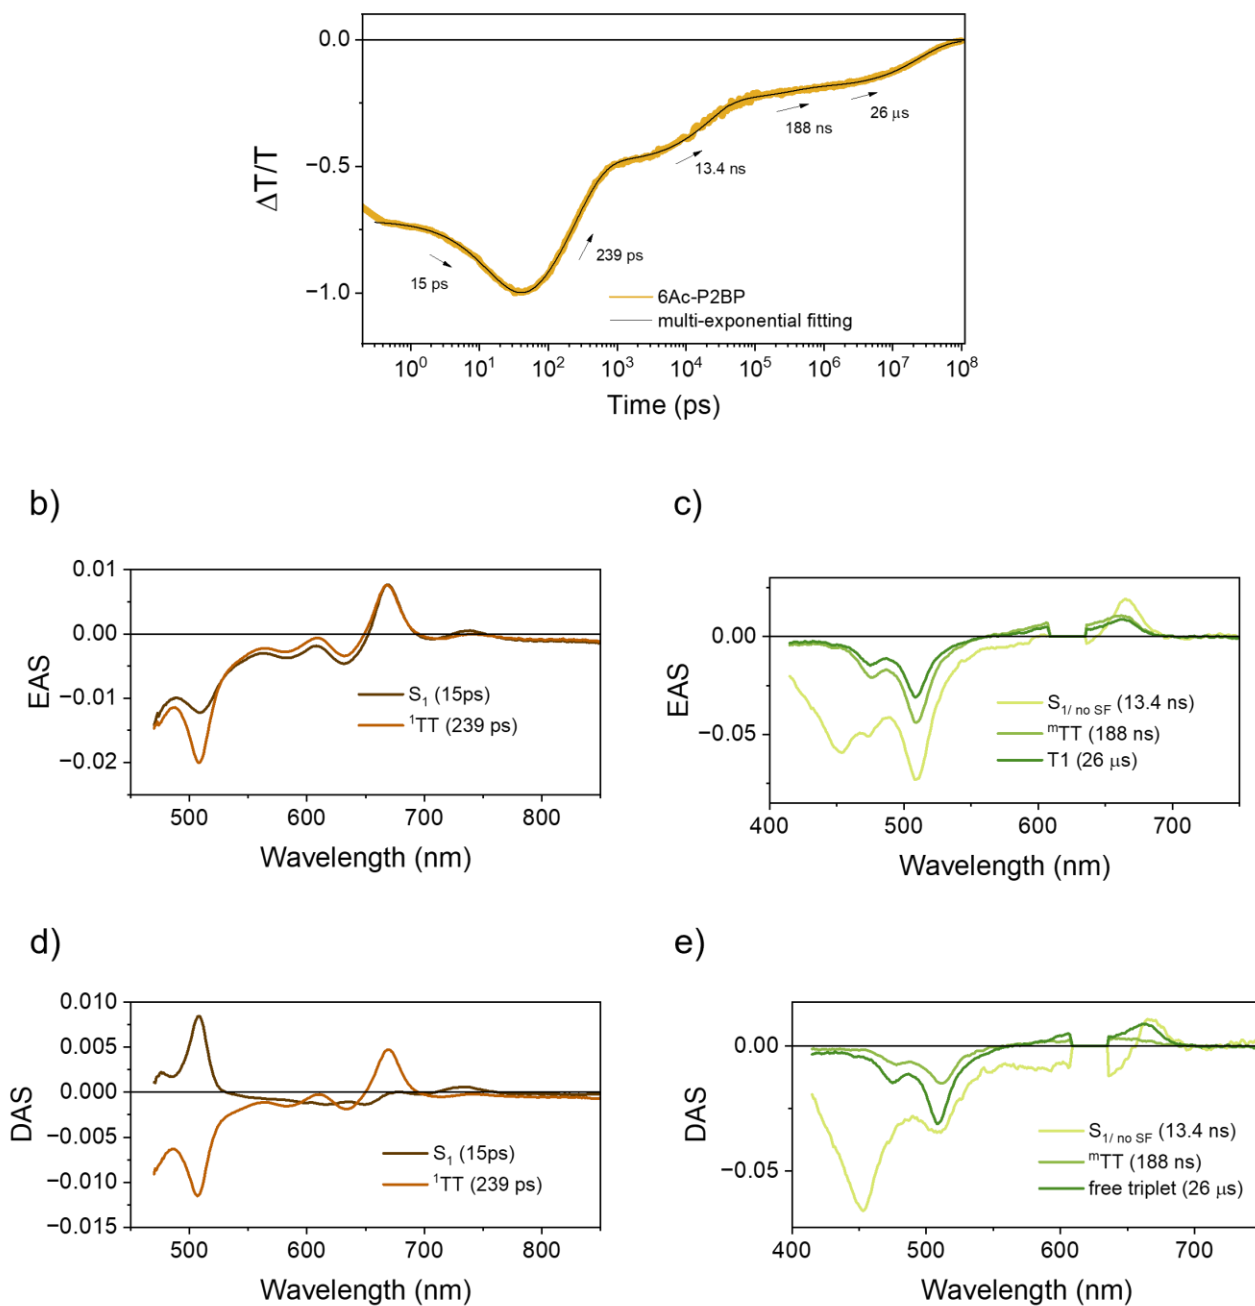

**Figure S4.2.12.** (a) Kinetic analysis of  $^1\text{TT}$  PIA region ( $\Delta T/T_{\text{avg}}$ ) in **6Ac-P2BP** using multiexponential fit. (b) fsTA and (c) nsTA EAS from global analysis. (d) fsTA and (e) nsTA DAS from global analysis.  $S_{1/\text{no SF}}$  corresponds to  $S_1$  subpopulation that does not undergo singlet fission. For more detailed analysis of 6Ac-P2BP dimers refer to J. Am. Chem. Soc. 2023, 145, 20883–20896.



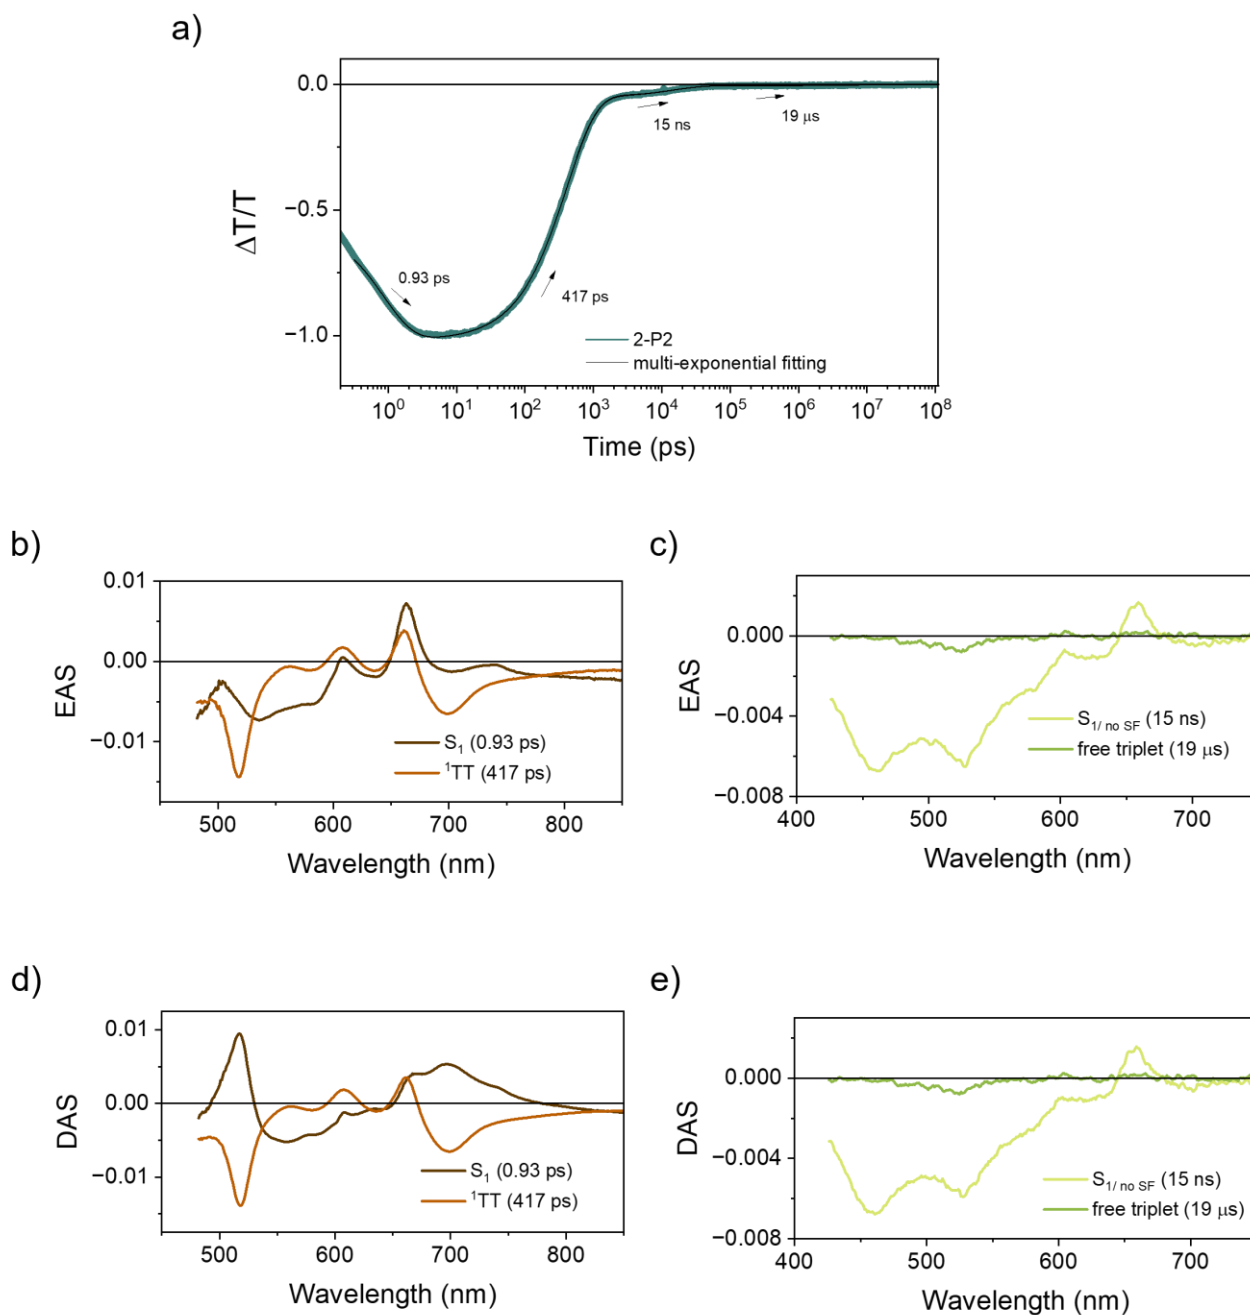

**Figure S4.2.13.** (a) Kinetic analysis of  ${}^1\text{TT}$  PIA region ( $\Delta T/T_{\text{avg}}$ ) in **2-P2** using multiexponential fit. (b) fsTA and (c) nsTA EAS from global analysis. (d) fsTA and (e) nsTA DAS from global analysis.  $S_{1/\text{no SF}}$  corresponds to  $S_1$  subpopulation that does not undergo singlet fission.

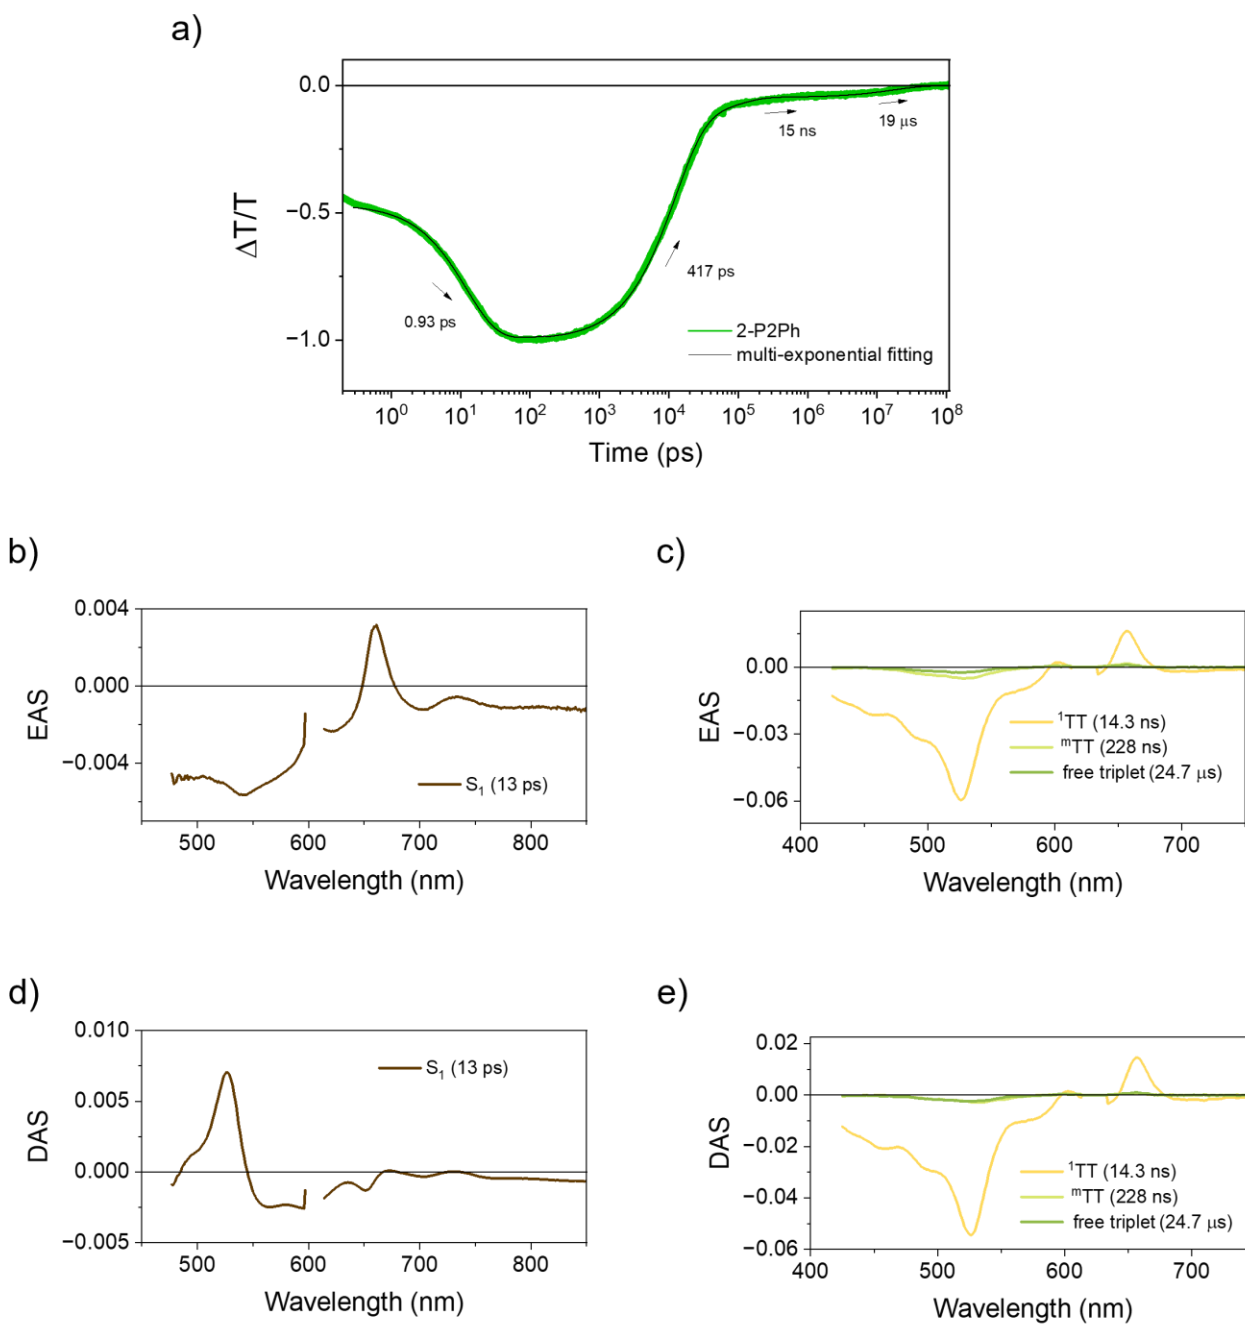

**Figure S4.2.14.** (a) Kinetic analysis of  $^1\text{TT}$  PIA region ( $\Delta T/T_{\text{avg}}$ ) in **2-P2Ph** using multiexponential fit. (b) fsTA and (c) nsTA EAS from global analysis. (d) fsTA and (e) nsTA DAS from global analysis.

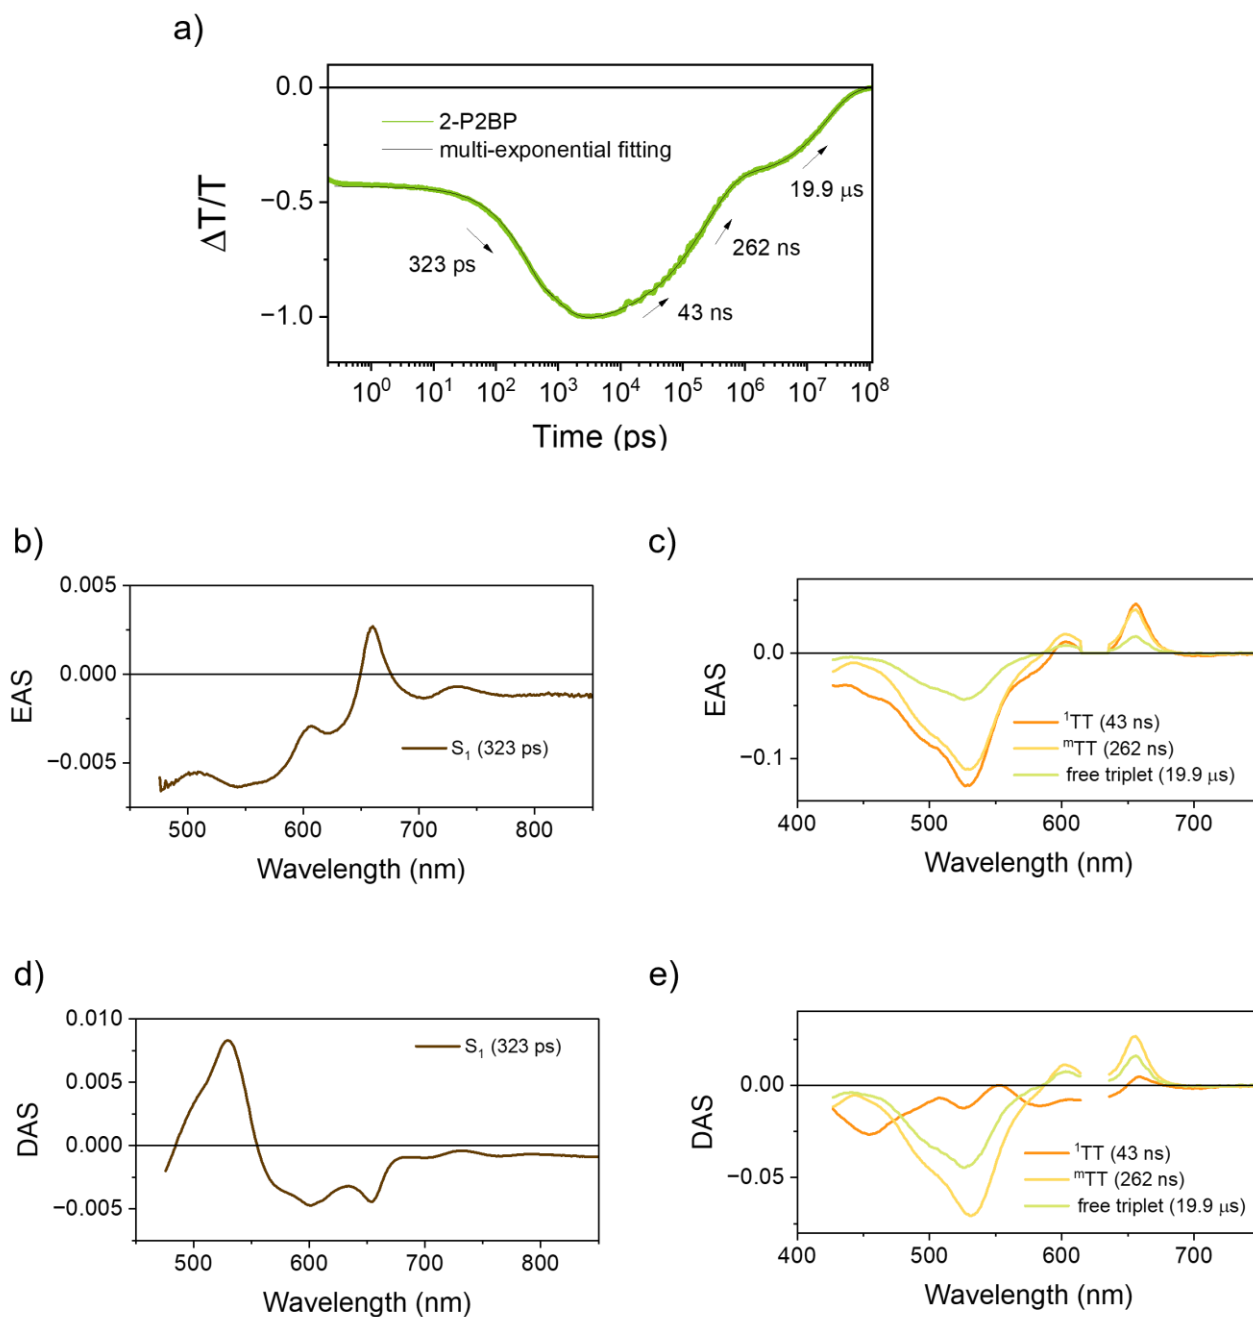

**Figure S4.2.15.** (a) Kinetic analysis of  ${}^1\text{TT}$  PIA region ( $\Delta T/T_{\text{avg}}$ ) in **2-P2BP** using multiexponential fit. (b) fsTA and (c) nsTA EAS from global analysis. (d) fsTA and (e) nsTA DAS from global analysis.

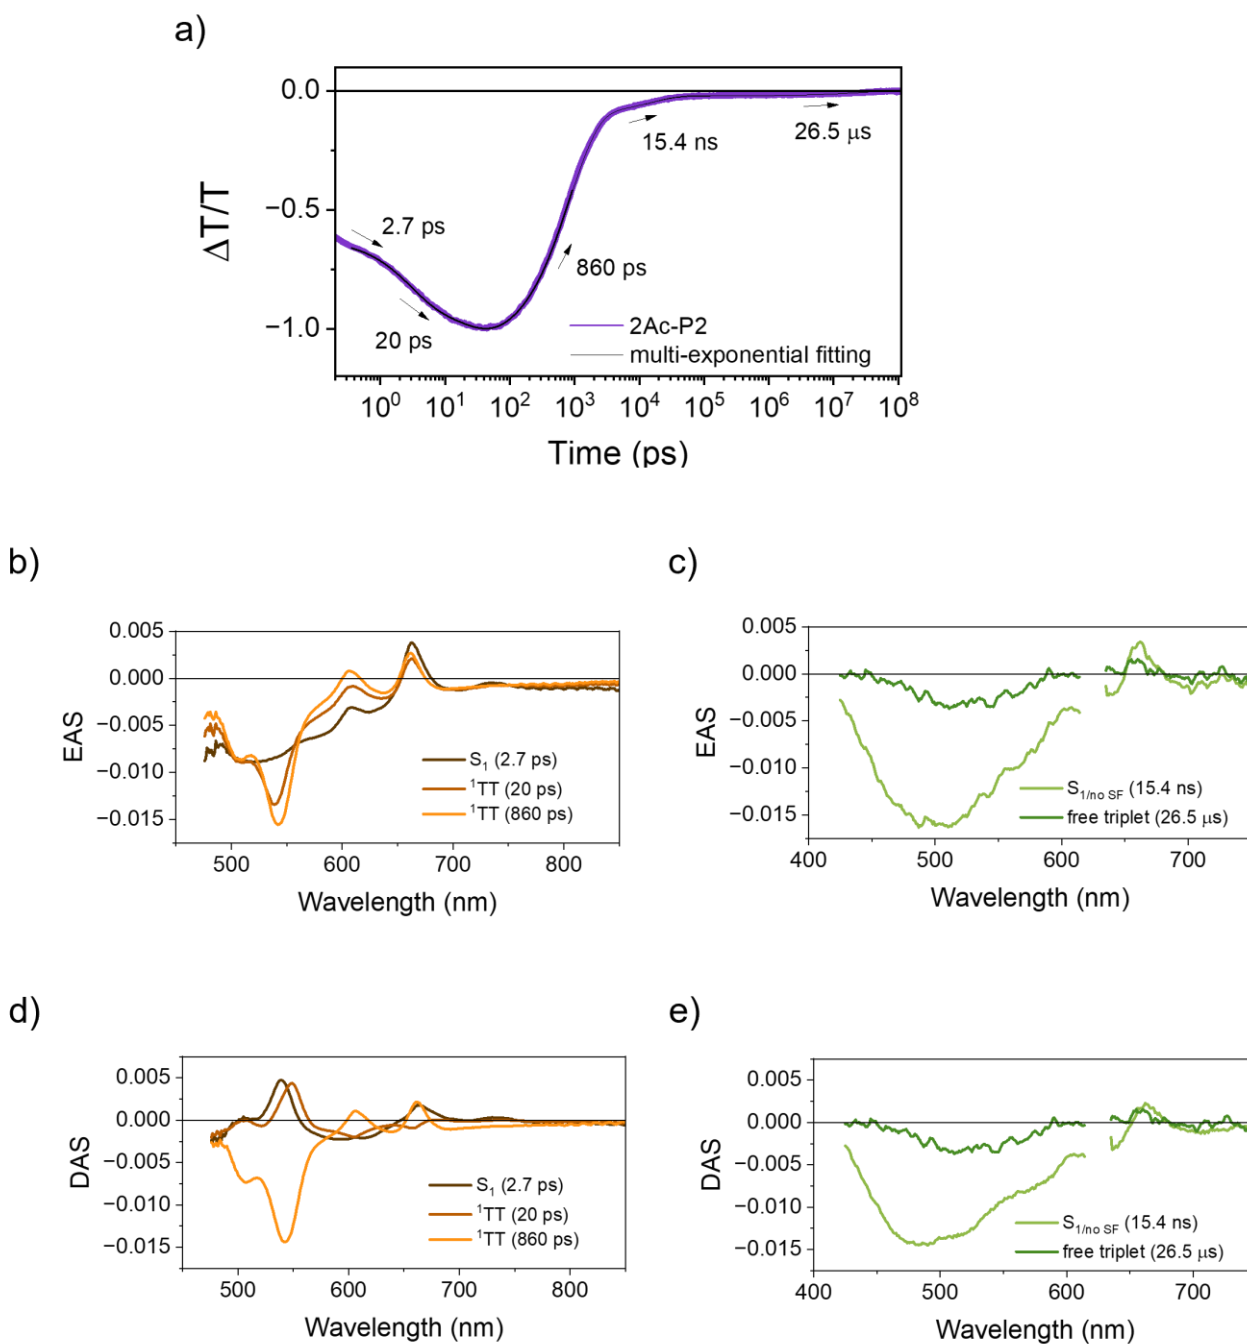

**Figure S4.2.16.** (a) Kinetic analysis of  $^1\text{TT}$  PIA region ( $\Delta T/T_{\text{avg}}$ ) in **2Ac-P2** using multiexponential fit. (b) fsTA and (c) nsTA EAS from global analysis. (d) fsTA and (e) nsTA DAS from global analysis.  $S_{1/\text{no SF}}$  corresponds to  $S_1$  subpopulation that does not undergo singlet fission.

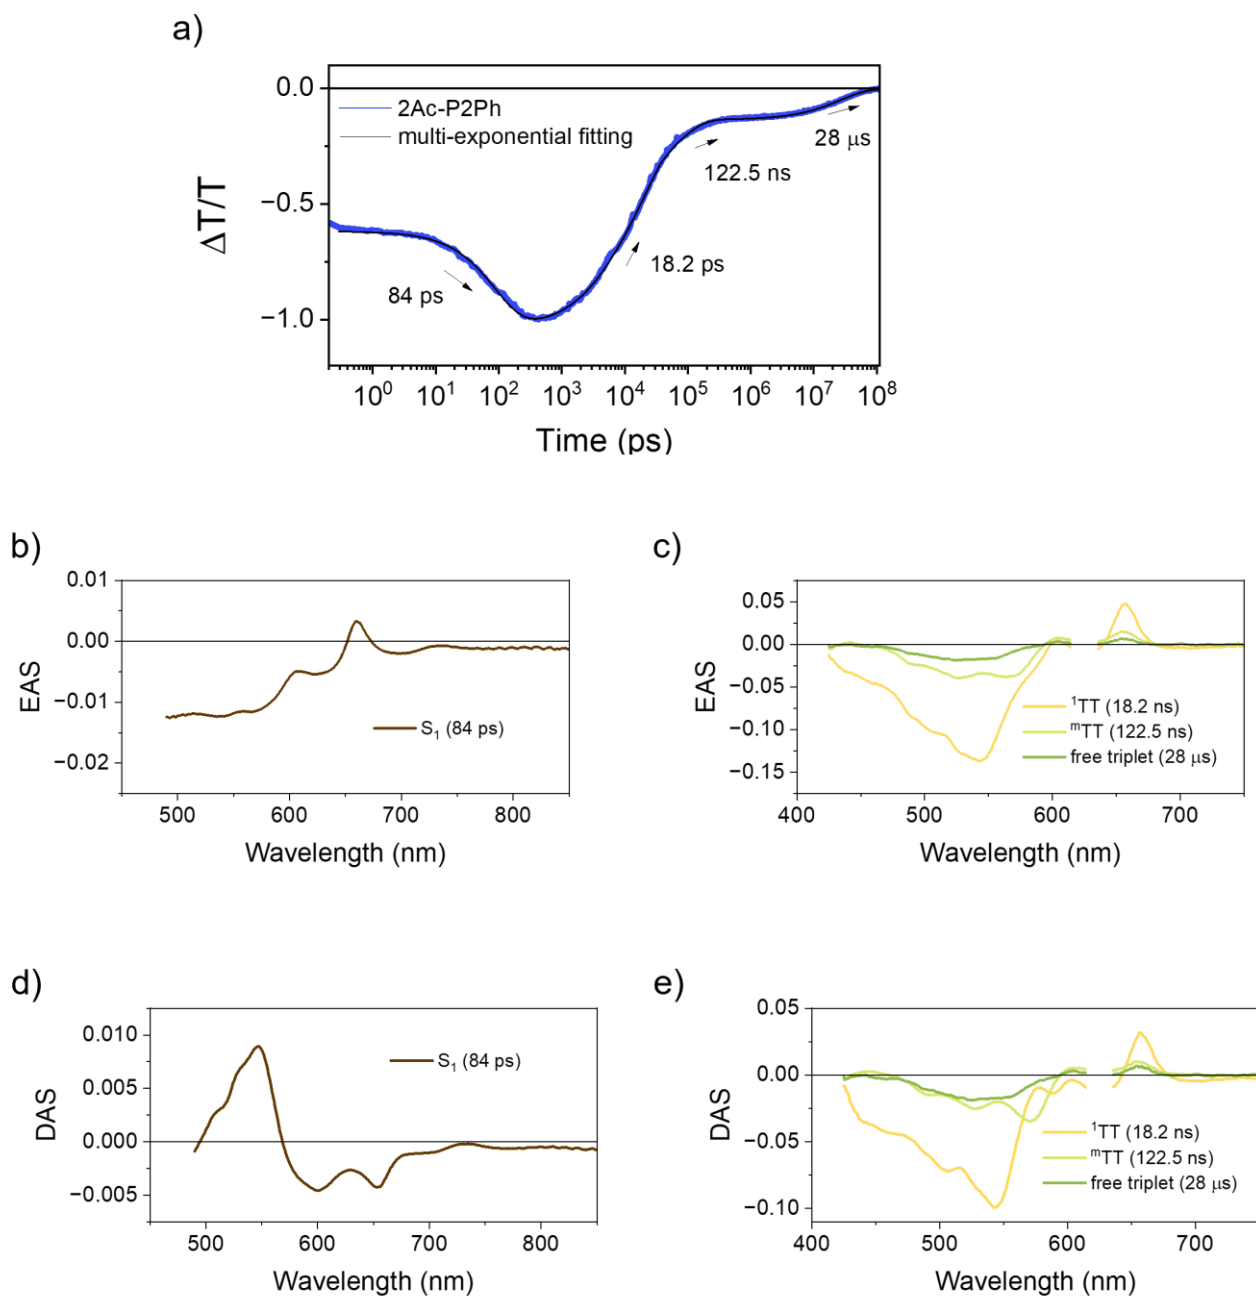

**Figure S4.2.17.** (a) Kinetic analysis of  $^1\text{TT}$  PIA region ( $\Delta T/T_{\text{avg}}$ ) in **2Ac-P2Ph** using multiexponential fit. (b) fsTA and (c) nsTA EAS from global analysis. (d) fsTA and (e) nsTA DAS from global analysis.

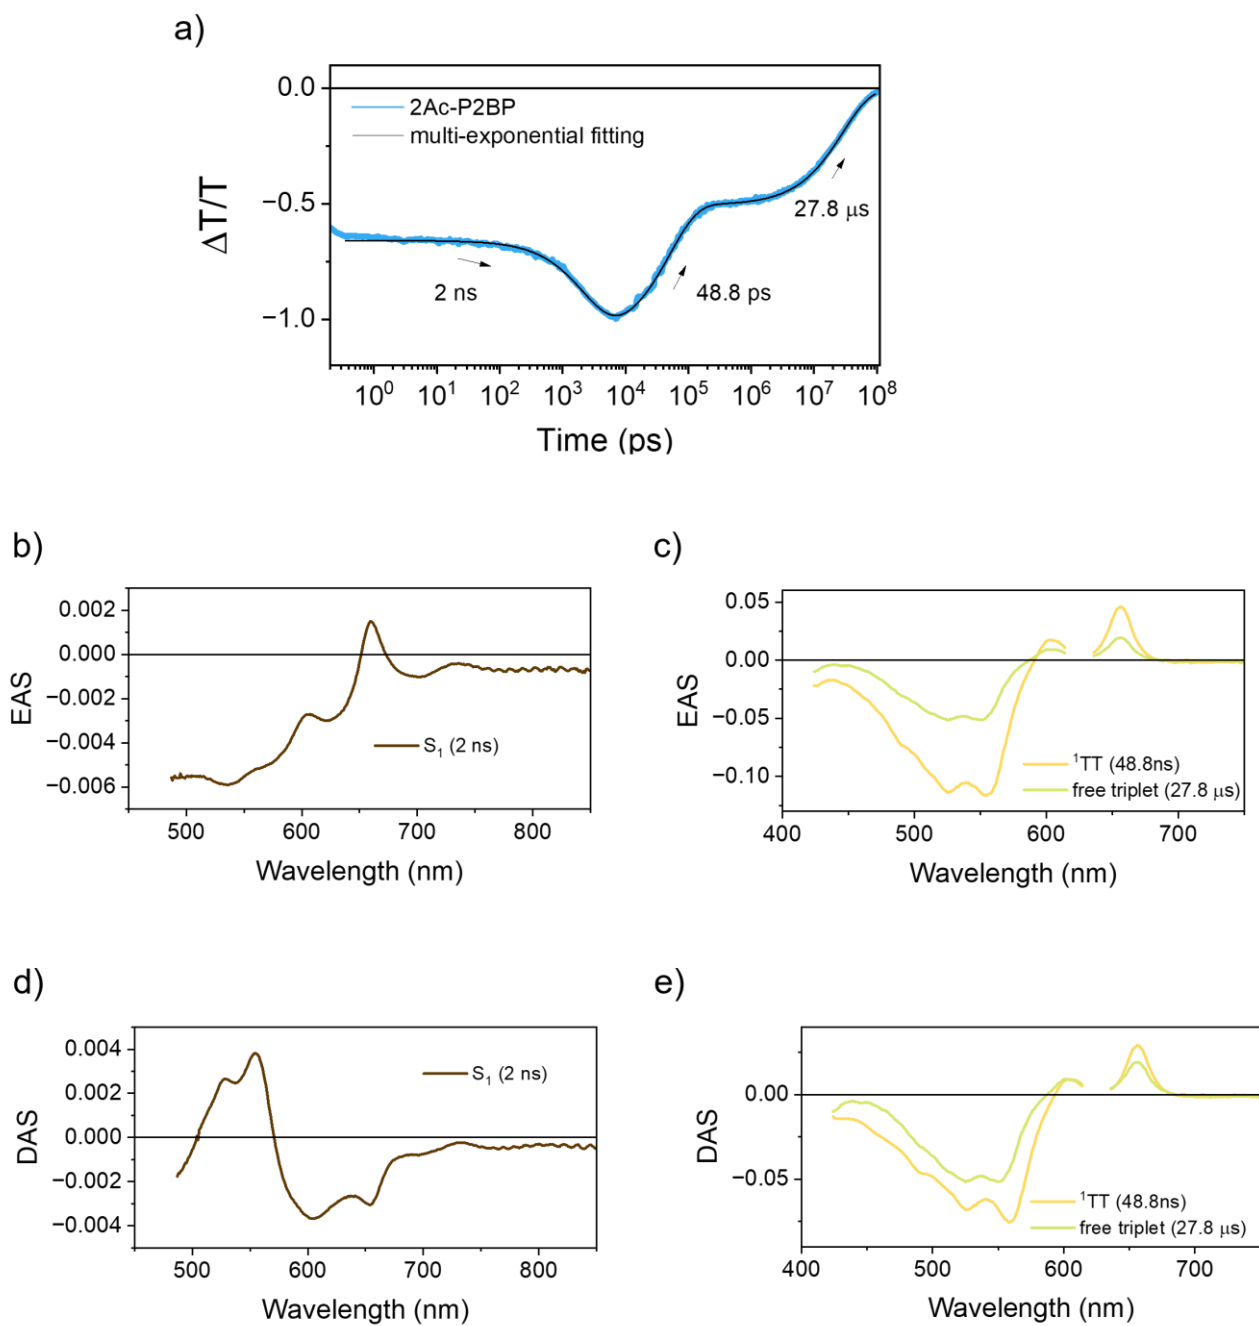

**Figure S4.2.18.** (a) Kinetic analysis of  $^1\text{TT}$  PIA region ( $\Delta T/T_{\text{avg}}$ ) in **2Ac-P2BP** using multiexponential fit. (b) fsTA and (c) nsTA EAS from global analysis. (d) fsTA and (e) nsTA DAS from global analysis.

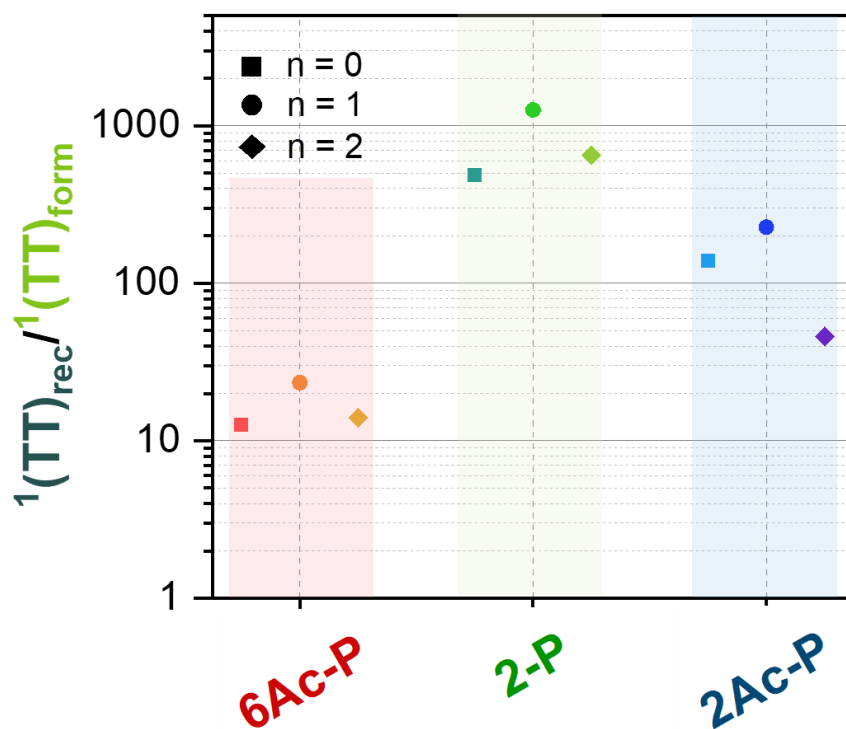

**Figure S4.2.19.** Ratio of  ${}^1\text{TT}_{\text{rec}}$  to  ${}^1\text{TT}_{\text{form}}$  in the different dimer classes shows both the **6Ac-P** and **2Ac-P** dimers have enhanced  ${}^1\text{TT}_{\text{rec}}$  relative to its  ${}^1\text{TT}_{\text{form}}$  as compared to the **2-P** dimers. For the ratio we have used the primary  ${}^1\text{TT}_{\text{rec}}$  and  ${}^1\text{TT}_{\text{form}}$  lifetimes.

## 5. $^1\text{H}$ , $^{13}\text{C}$ NMR Spectra and MALDI-TOF MS:

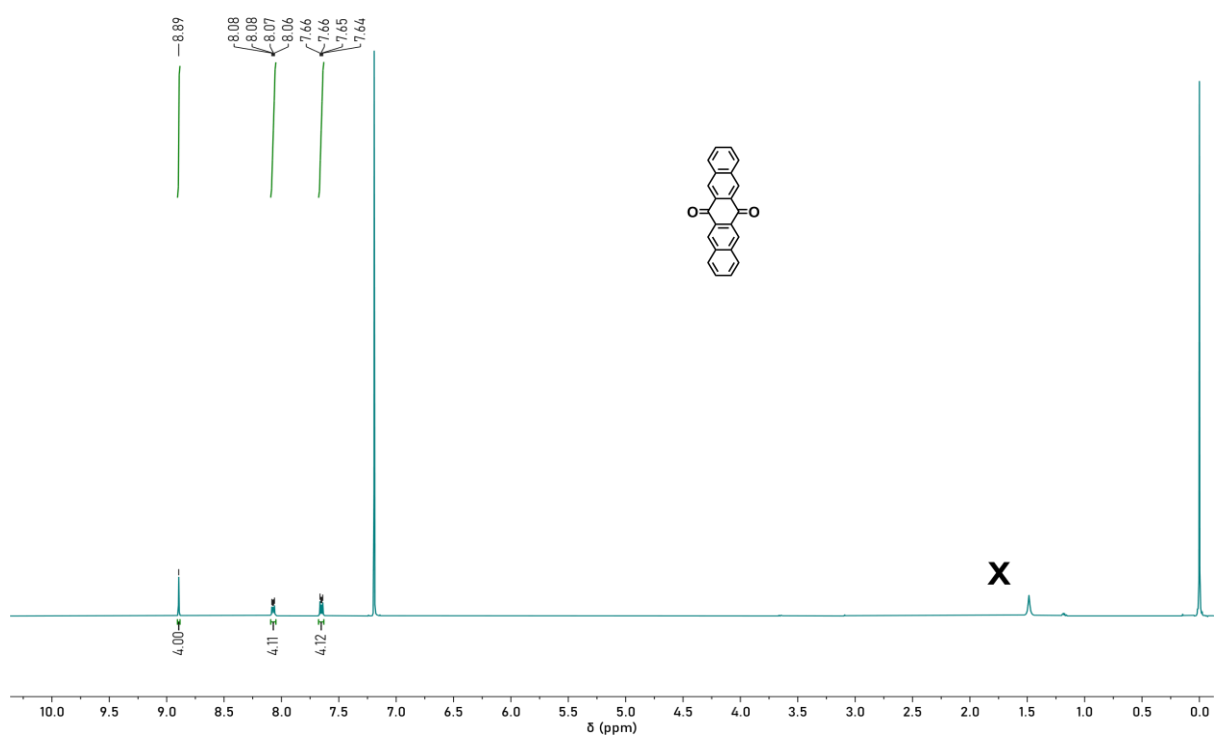

Figure S5.1.  $^1\text{H}$  NMR spectrum of 8a in  $\text{CDCl}_3$  [ $x = \text{H}_2\text{O}$ ]

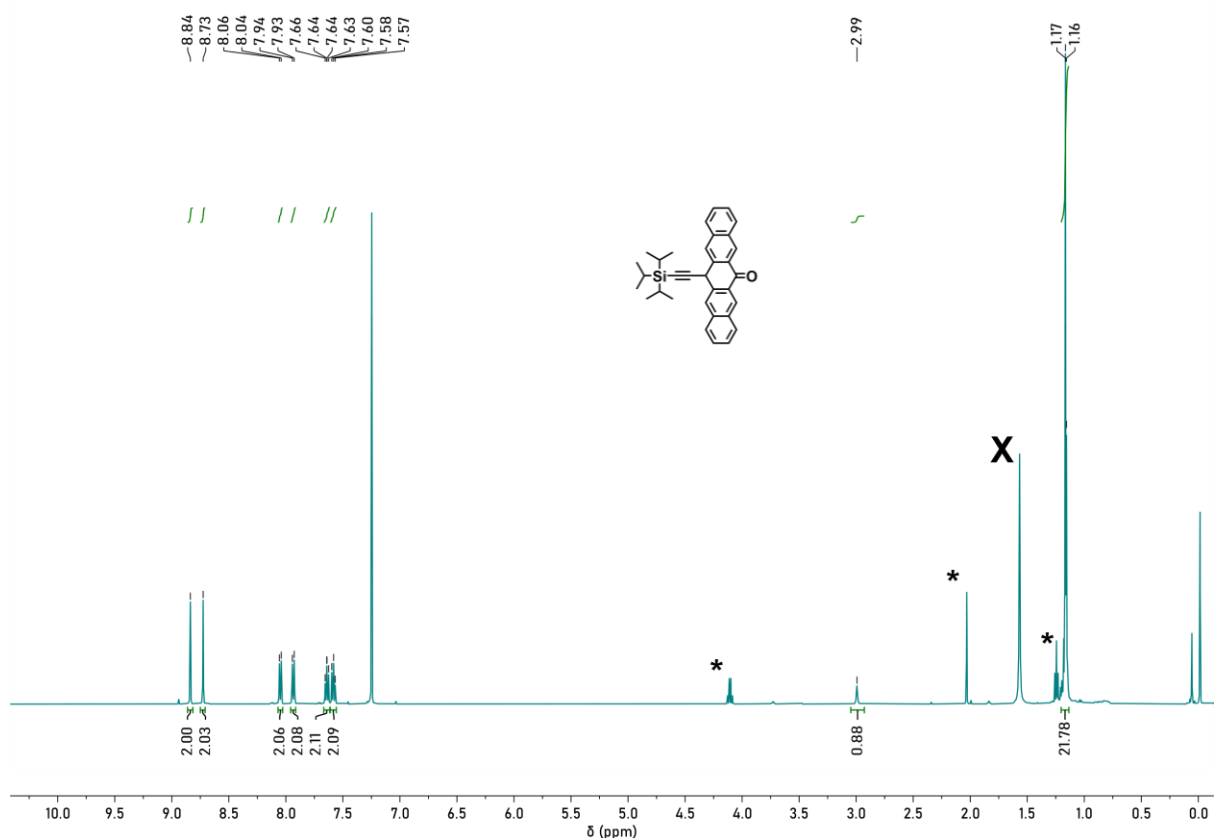

Figure S5.2.  $^1\text{H}$  NMR spectrum of 8b in  $\text{CDCl}_3$  [ $x = \text{H}_2\text{O}$ ; \* = ethyl acetate]



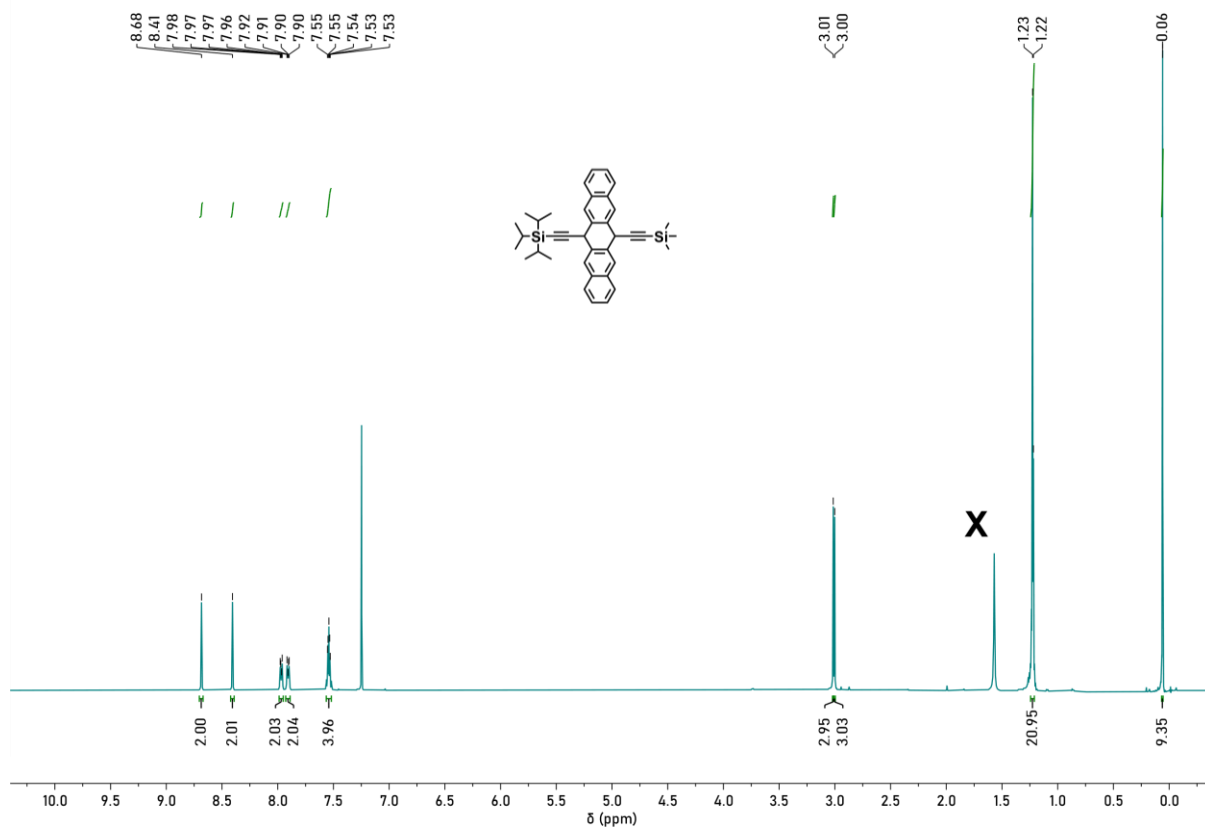

**Figure S5.3.**  $^1\text{H}$  NMR spectrum of **8c** in  $\text{CDCl}_3$  [ $x = \text{H}_2\text{O}$ ]

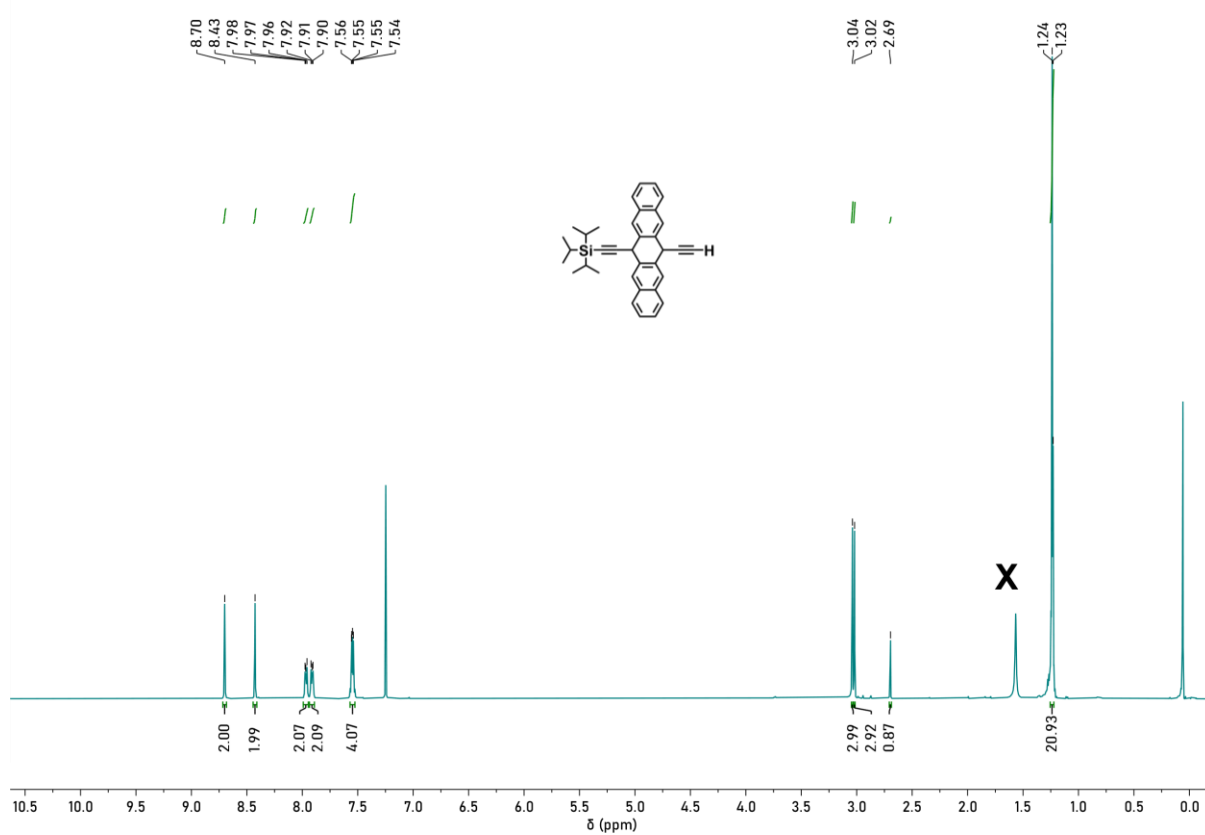

**Figure S5.4.**  $^1\text{H}$  NMR spectrum of **6** in  $\text{CDCl}_3$  [ $x = \text{H}_2\text{O}$ ]

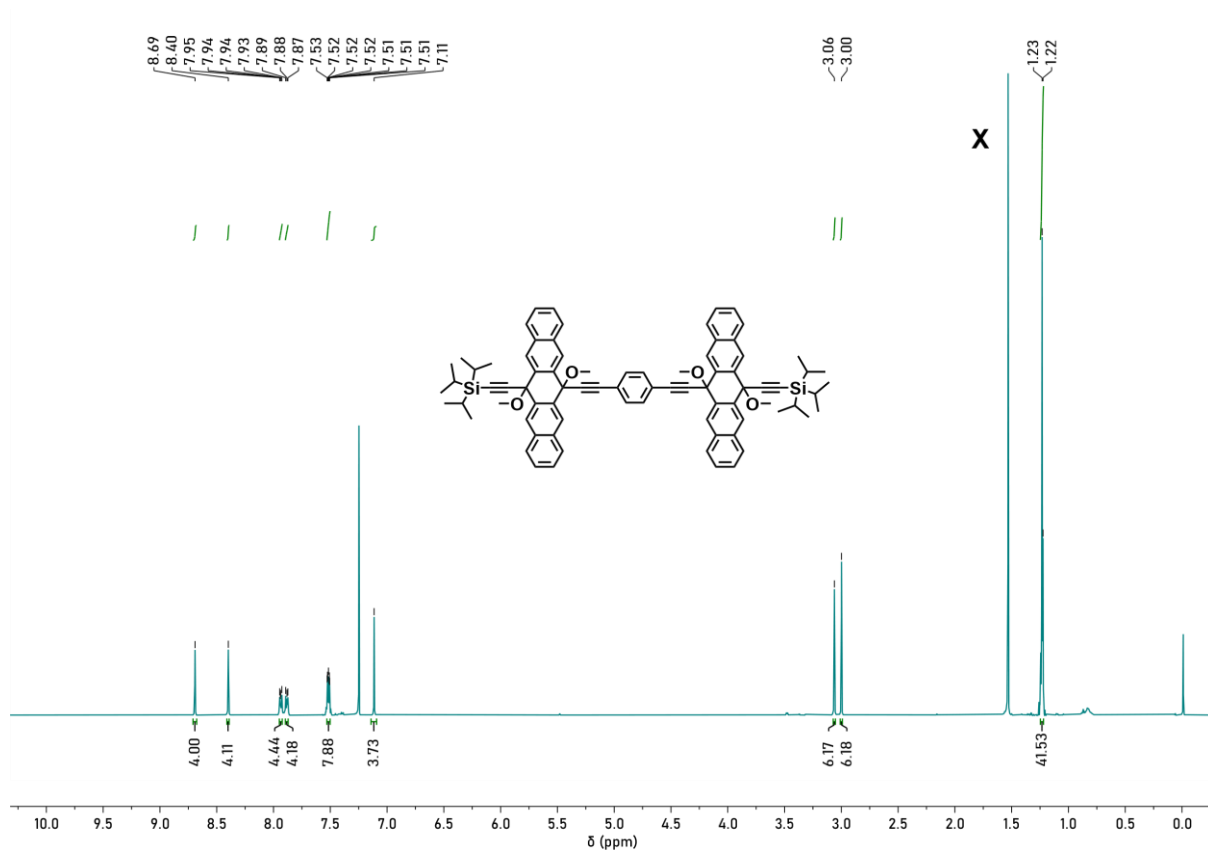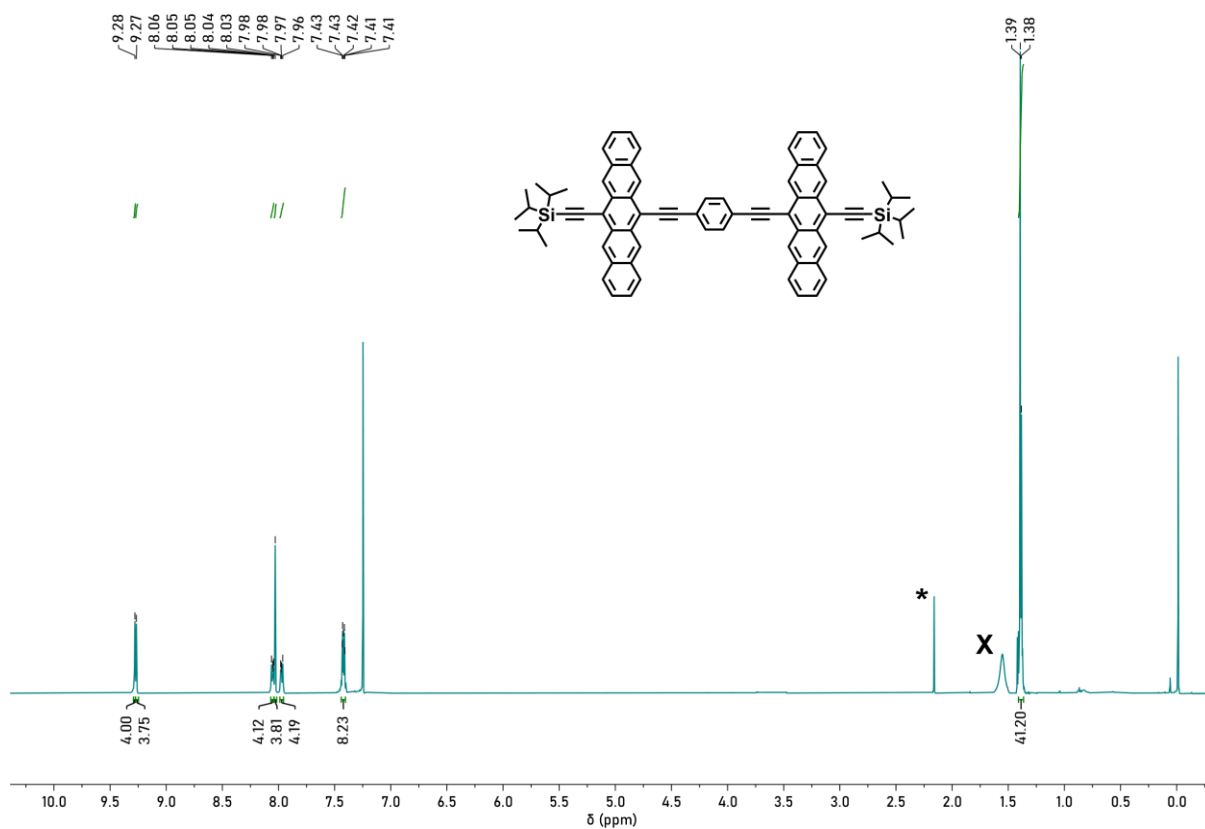

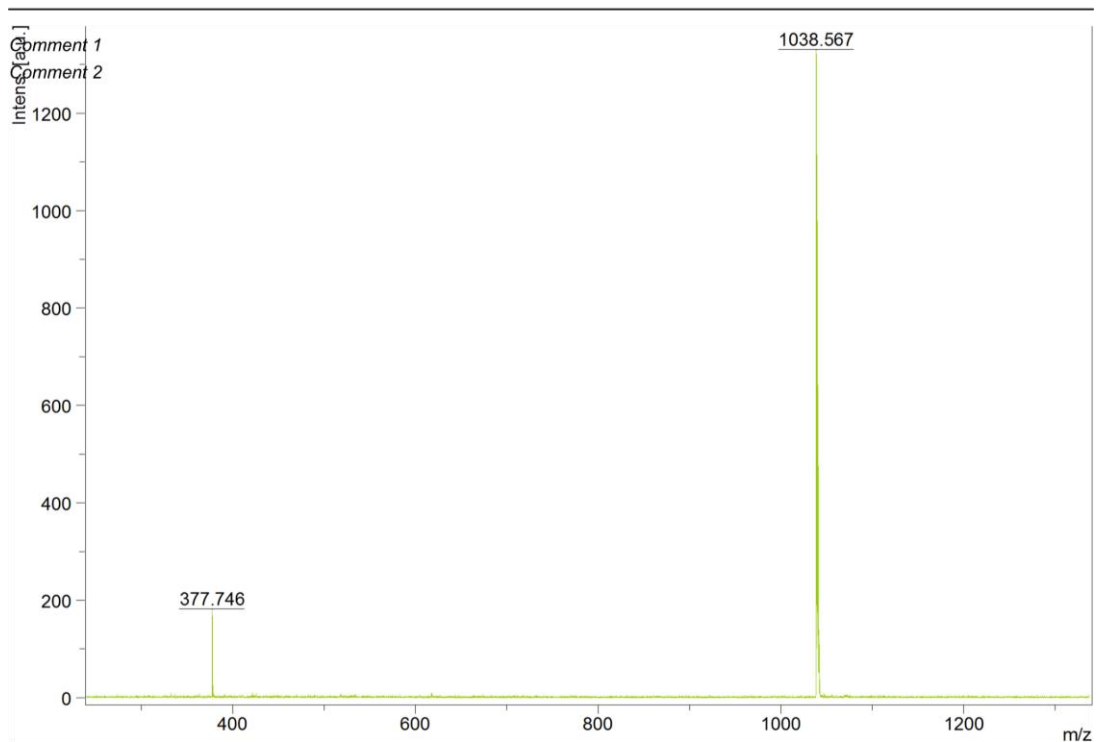

**Acquisition Parameter**

Date of acquisition 2020-02-05T16:35:19.208+05:30  
Acquisition method name D:\Methods\flexControlMethods\LP\_700-2000\_Da.par  
Acquisition operation mode Linear  
Voltage polarity POS  
Number of shots 500  
Name of spectrum used for calibration  
Calibration reference list used PeptideCalibStandard mono

**Instrument Info**

User JNCASR  
Instrument ATS-00704  
Instrument type autoflex

**Figure S5.7. MALDI-MS of 6Ac-P2Ph**

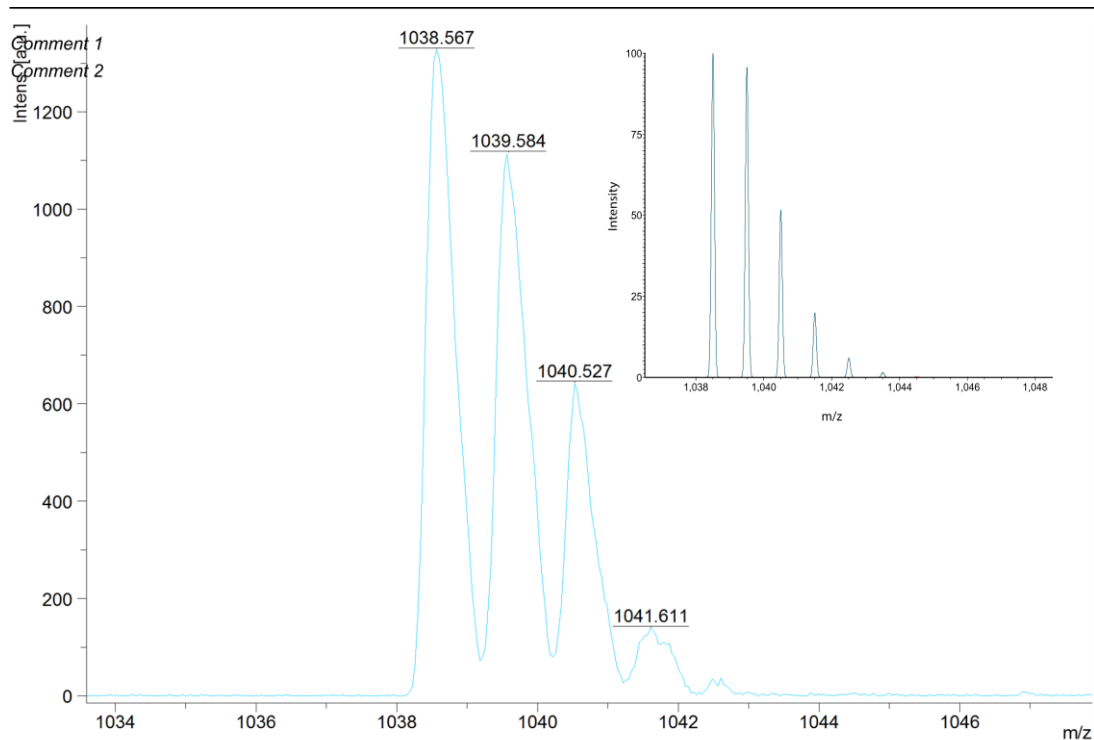

| m/z      | S/N | Quality Fac. | Res. | Intens. | Area |
|----------|-----|--------------|------|---------|------|
| 1038.567 |     |              |      | 1327    |      |
| 1039.584 | 160 |              | 720  | 1115    | 1637 |
| 1040.527 |     |              |      | 642     |      |
| 1041.611 |     |              |      | 138     |      |

#### Acquisition Parameter

Date of acquisition 2020-02-05T16:35:19.208+05:30  
 Acquisition method name D:\Methods\flexControlMethods\LP\_700-2000\_Da.par  
 Acquisition operation mode Linear  
 Voltage polarity POS  
 Number of shots 500  
 Name of spectrum used for calibration  
 Calibration reference list used PeptideCalibStandard mono

#### Instrument Info

User JNCASR  
 Instrument ATS-00704  
 Instrument type autoflex

**Figure S5.8.** MALDI-MS isotopic distribution of **6Ac-P2Ph**, ( $M^+$ ). Simulated isotopic distribution of **3f** (inset).

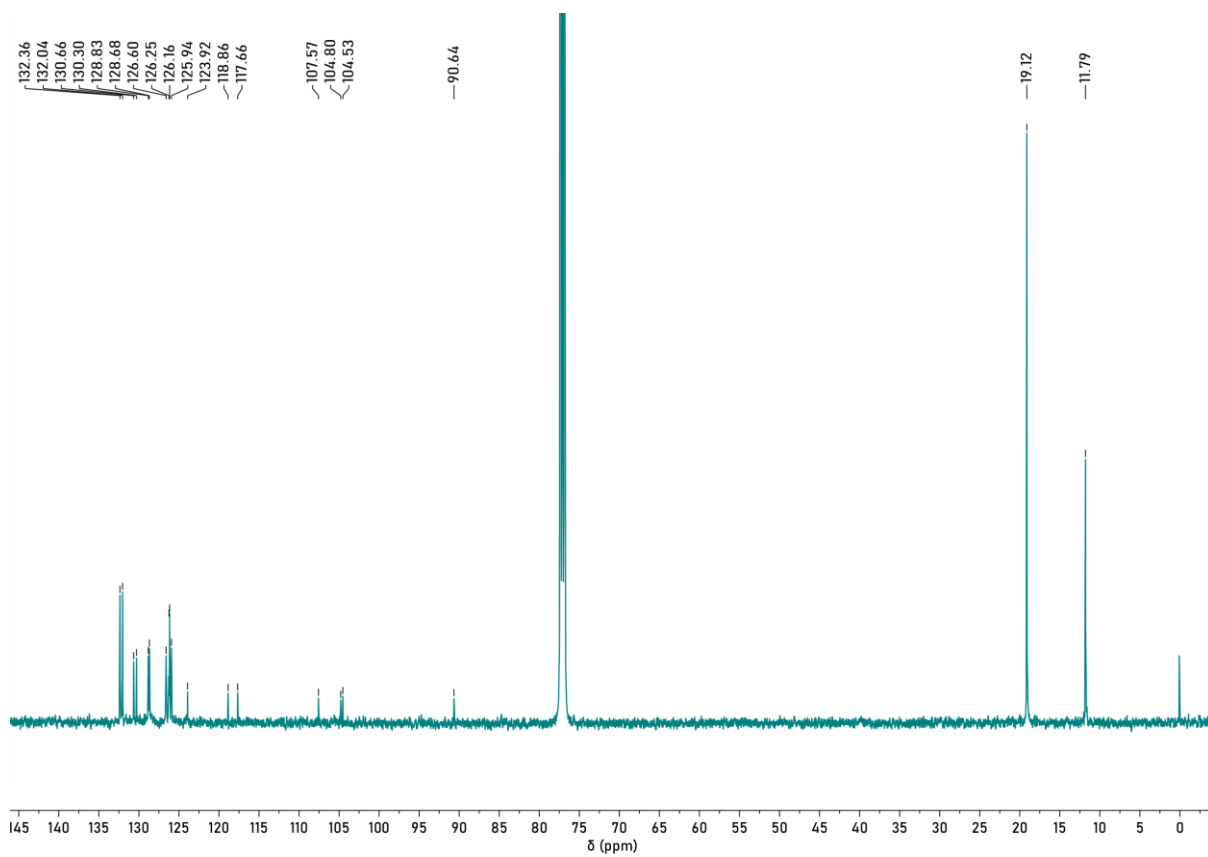

Figure S5.9.  $^{13}\text{C}$  NMR spectrum of 6Ac-P2Ph in  $\text{CDCl}_3$

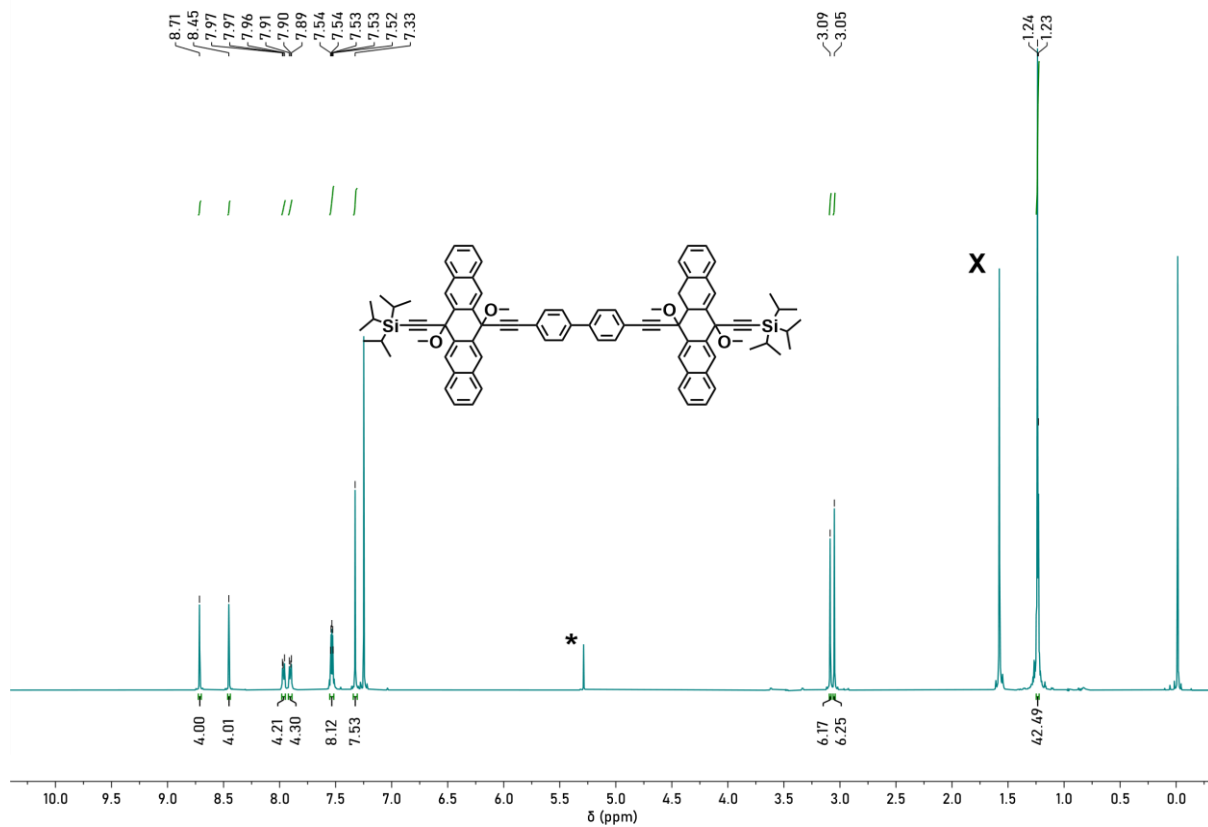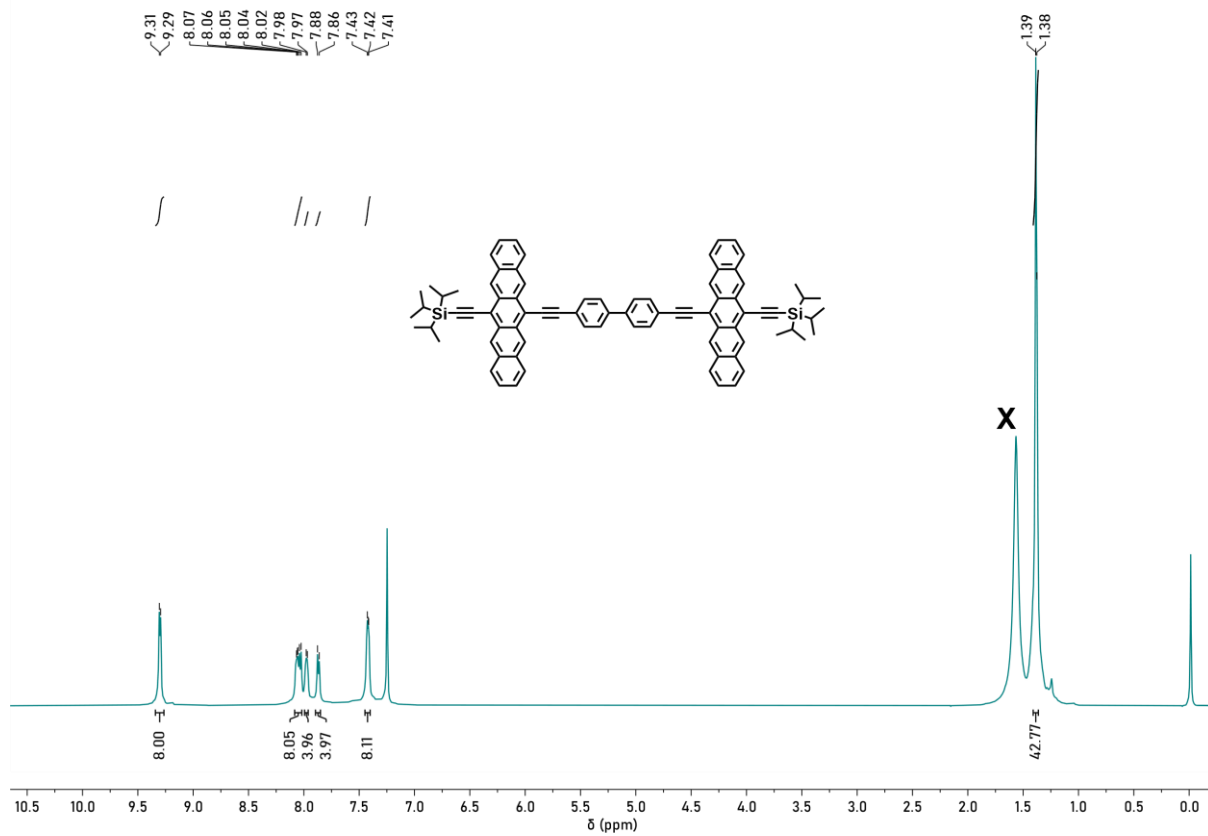

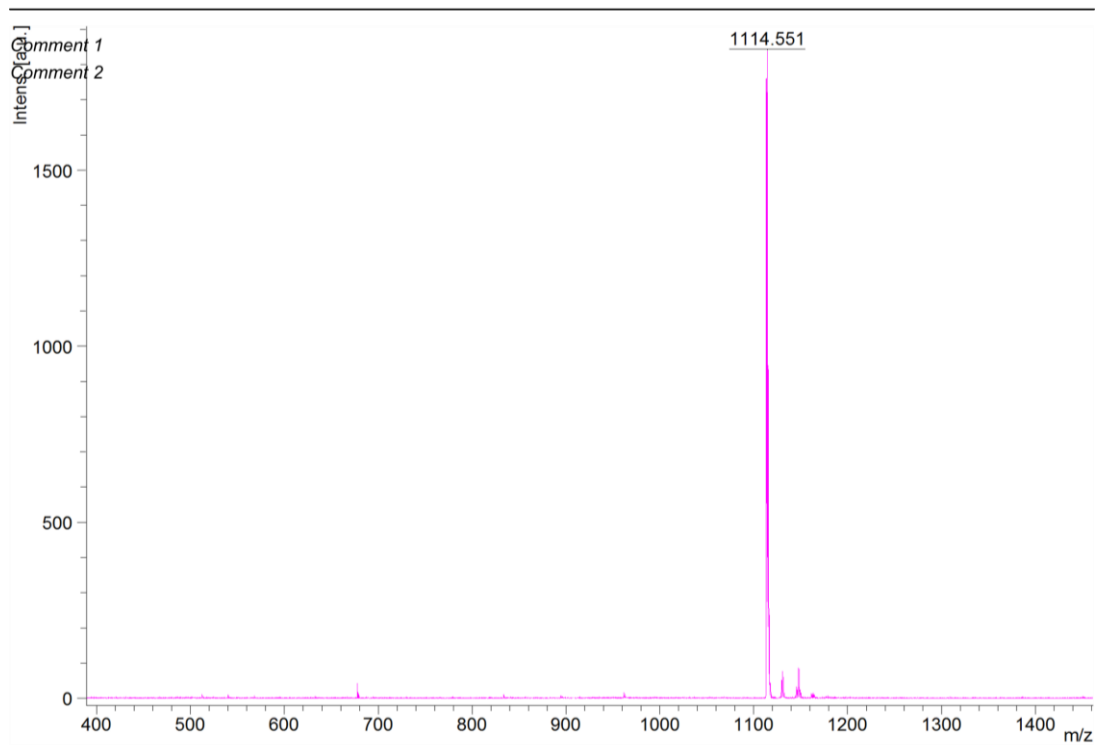

**Acquisition Parameter**

Date of acquisition 2022-05-12T17:17:06.574+02:00  
Acquisition method name D:\Methods\flexControlMethods\LP\_700-2000\_Da.par  
Acquisition operation mode Linear  
Voltage polarity POS  
Number of shots 2000  
Name of spectrum used for calibration  
Calibration reference list used PeptideCalibStandard mono

**Instrument Info**

User JNC  
Instrument FLEX-PC  
Instrument type autoflex

**Figure S5.12. MALDI-MS of 6Ac-P2BP**

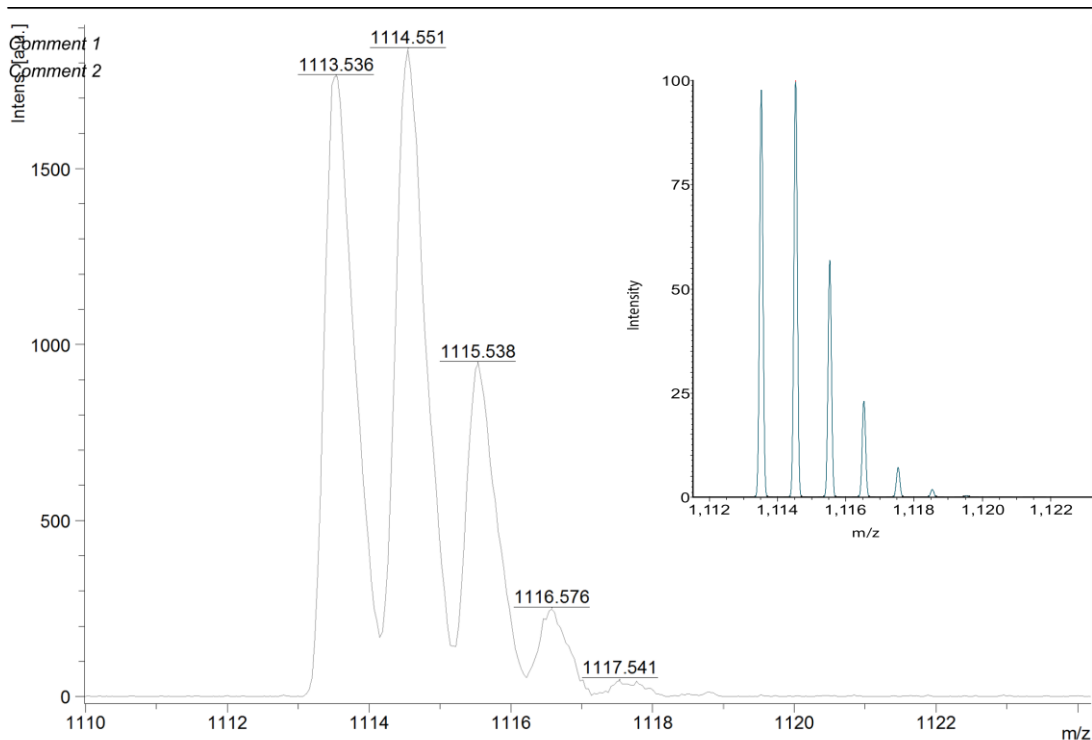

| m/z      | S/N | Quality Fac. | Res. | Intens. | Area |
|----------|-----|--------------|------|---------|------|
| 1113.536 |     |              |      | 1761    |      |
| 1114.551 | 188 |              | 504  | 1838    | 2456 |
| 1115.538 |     |              |      | 944     |      |
| 1116.576 |     |              |      | 248     |      |
| 1117.541 |     |              |      | 43.4    |      |

#### Acquisition Parameter

Date of acquisition 2022-05-12T17:17:06.574+02:00  
 Acquisition method name D:\Methods\flexControlMethods\LP\_700-2000\_Da.par  
 Acquisition operation mode Linear  
 Voltage polarity POS  
 Number of shots 2000  
 Name of spectrum used for calibration  
 Calibration reference list used PeptideCalibStandard mono

#### Instrument Info

User JNC  
 Instrument FLEX-PC

Bruker Daltonics flexAnalysis

printed:

7/8/2022 4:50:39 PM

**Figure S5.13.** MALDI-MS isotopic distribution of **6Ac-P2BP**, ( $[M-H]^+$ ). Simulated isotopic distribution of **3a** (inset).



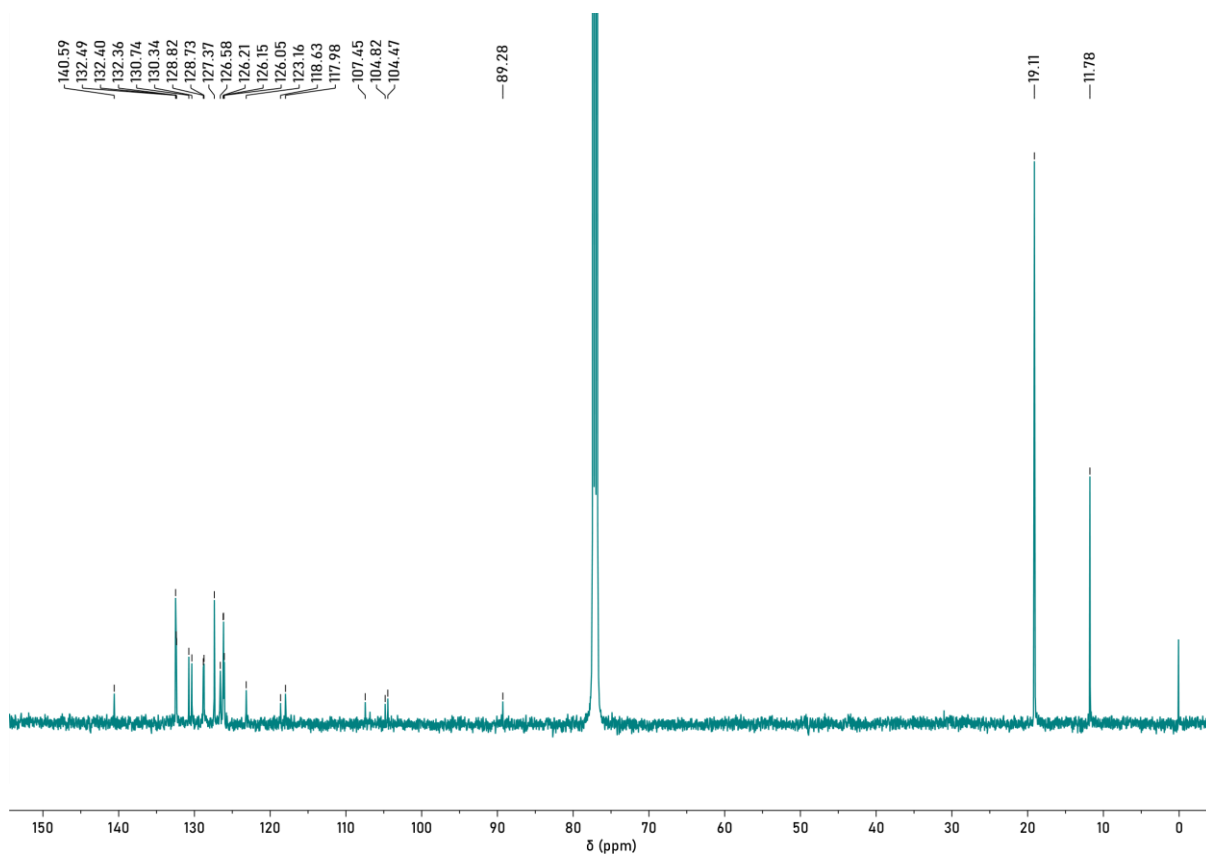

**Figure S5.14.**  $^{13}\text{C}$  NMR spectrum of **6Ac-P2BP** in  $\text{CDCl}_3$

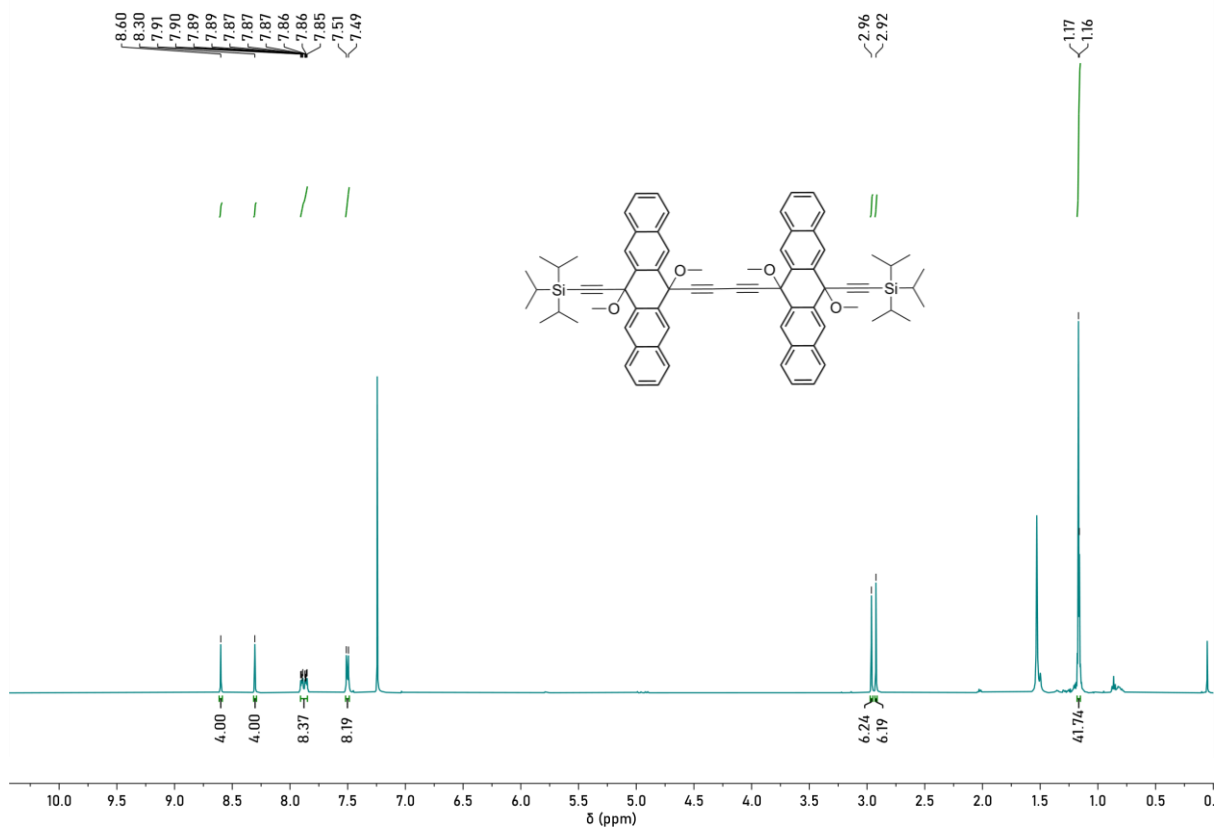

**Figure S5.15.**  $^1\text{H}$  NMR spectrum of **7b**( $n=0$ ) in  $\text{CDCl}_3$  [ $x = \text{H}_2\text{O}$ ]

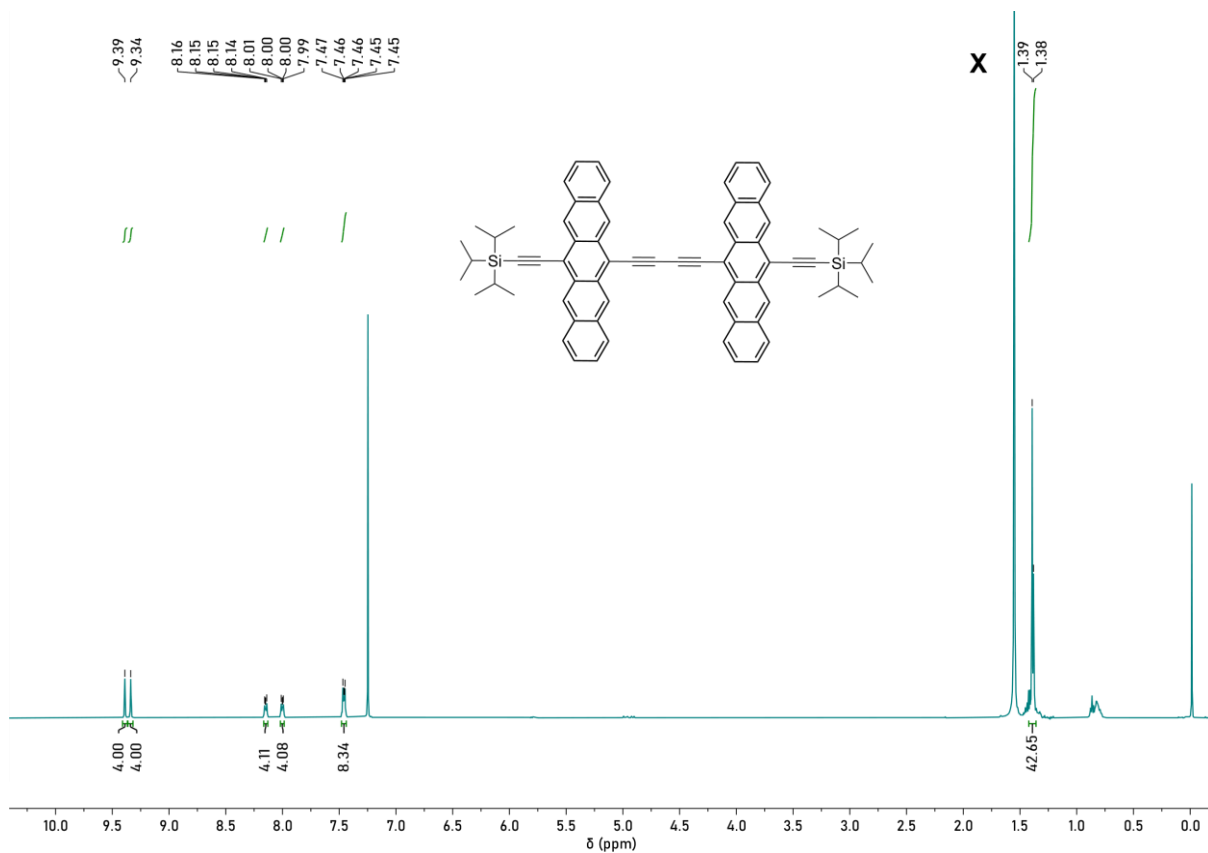

**Figure S5.16.**  $^1\text{H}$  NMR spectrum of **6Ac-P2** in  $\text{CDCl}_3$  [ $x = \text{H}_2\text{O}$ ]

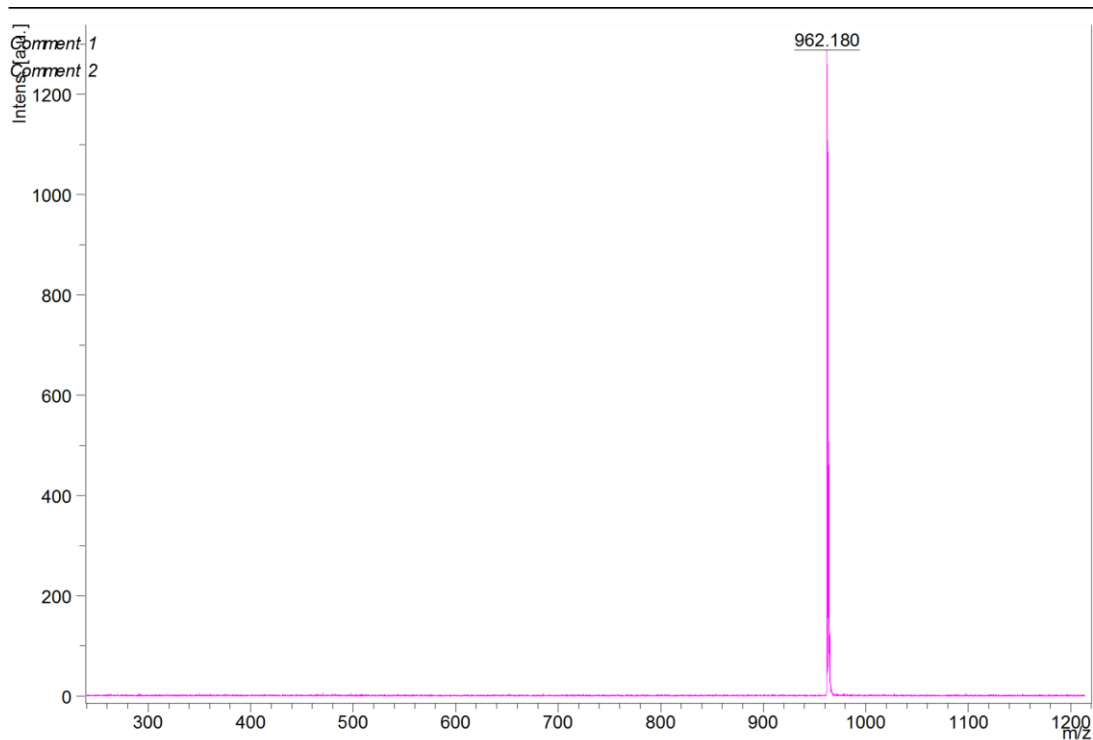

#### **Acquisition Parameter**

*Date of acquisition* 2020-02-05T16:31:12.520+05:30  
*Acquisition method name* D:\Methods\flexControlMethods\LP\_700-2000\_Da.par  
*Acquisition operation mode* Linear  
*Voltage polarity* POS  
*Number of shots* 500  
*Name of spectrum used for calibration*  
*Calibration reference list used* PeptideCalibStandard mono

#### **Instrument Info**

*User* JNCASR  
*Instrument* ATS-00704  
*Instrument type* autoflex

**Figure S5.17. MALDI-MS of 6Ac-P2**

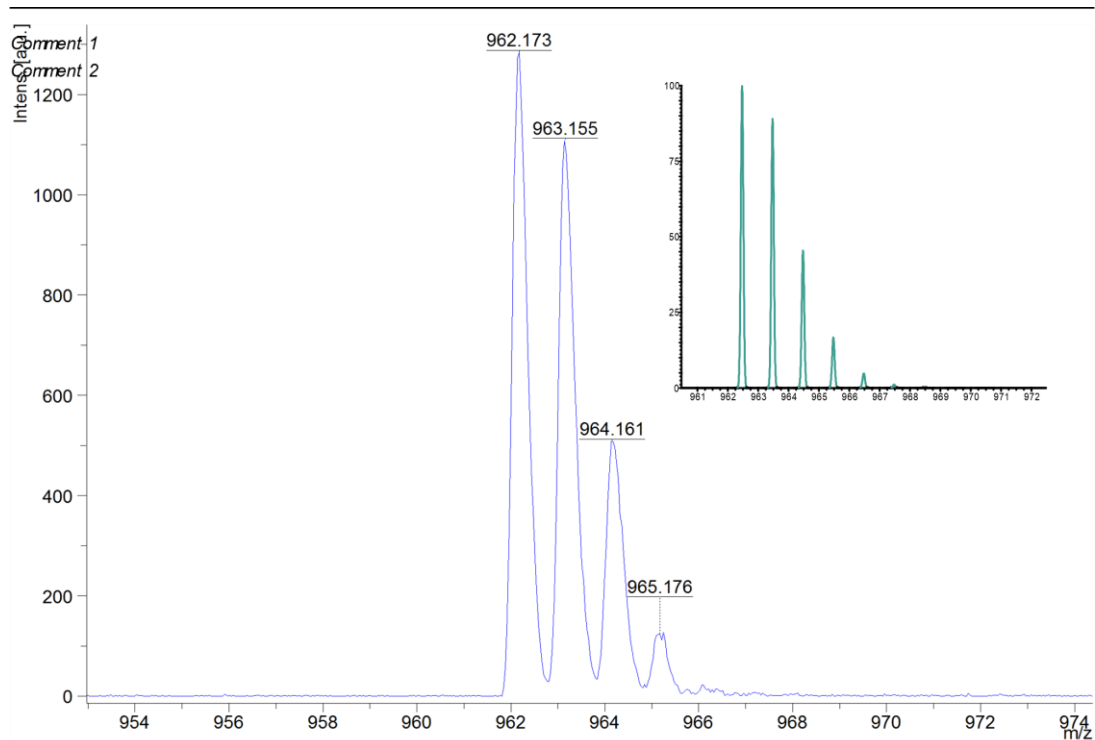

| m/z     | S/N | Quality Fac. | Res. | Intens. | Area |
|---------|-----|--------------|------|---------|------|
| 962.173 |     |              |      | 1282    |      |
| 963.155 | 158 |              | 717  | 1108    | 1272 |
| 964.161 |     |              |      | 507     |      |
| 965.176 |     |              |      | 123     |      |

#### Acquisition Parameter

Date of acquisition 2020-02-05T16:31:12.520+05:30  
 Acquisition method name D:\Methods\flexControlMethods\LP\_700-2000\_Da.par  
 Acquisition operation mode Linear  
 Voltage polarity POS  
 Number of shots 500  
 Name of spectrum used for calibration  
 Calibration reference list used PeptideCalibStandard mono

#### Instrument Info

User JNCASR  
 Instrument ATS-00704  
 Instrument type autoflex

**Figure S5.18.** MALDI-MS isotopic distribution of **6Ac-P2**, ( $M^+$ ). Simulated isotopic distribution of **3r** (inset).

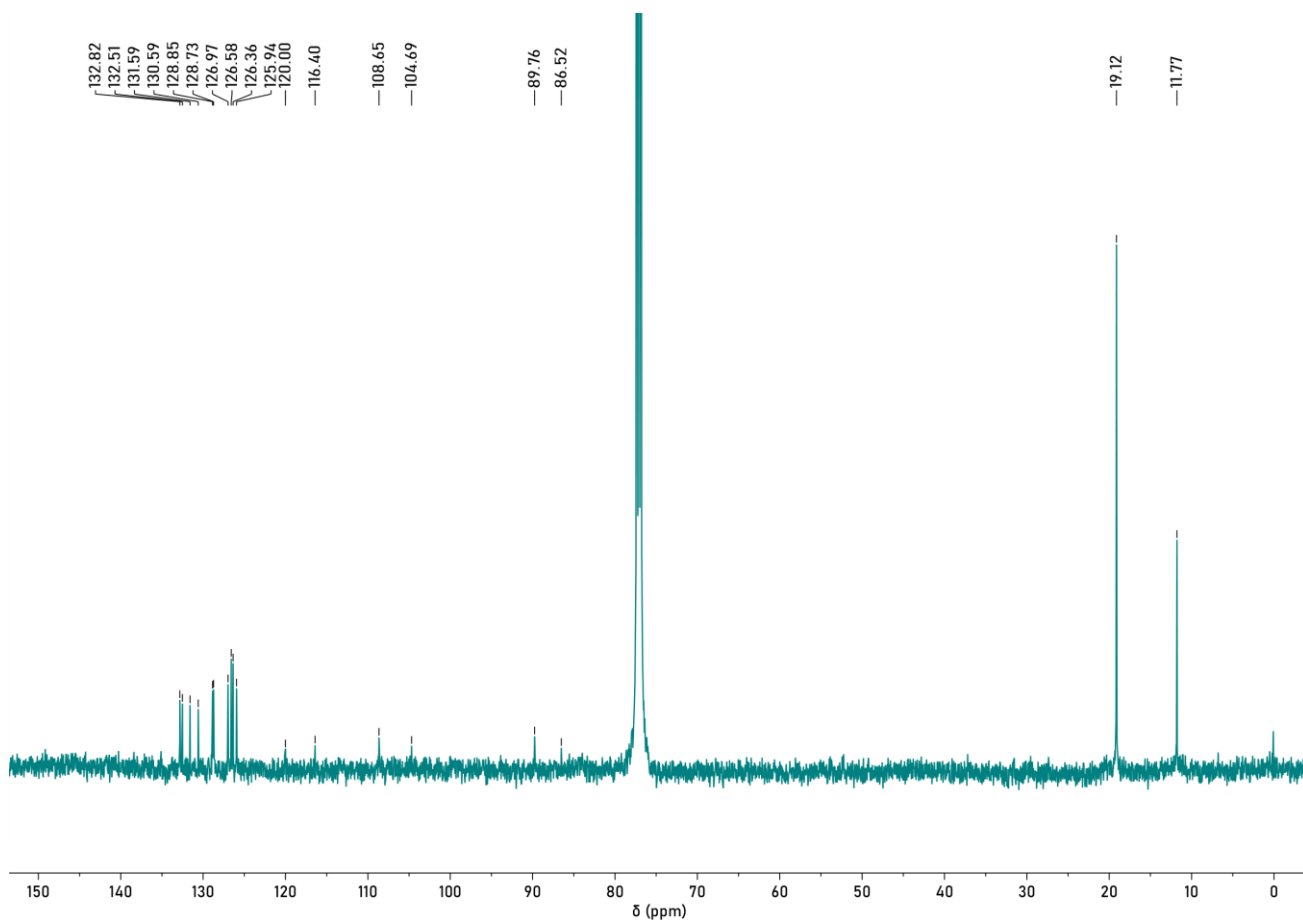

Figure S5.19.  $^{13}\text{C}$  NMR spectrum of 6Ac-P2 in  $\text{CDCl}_3$

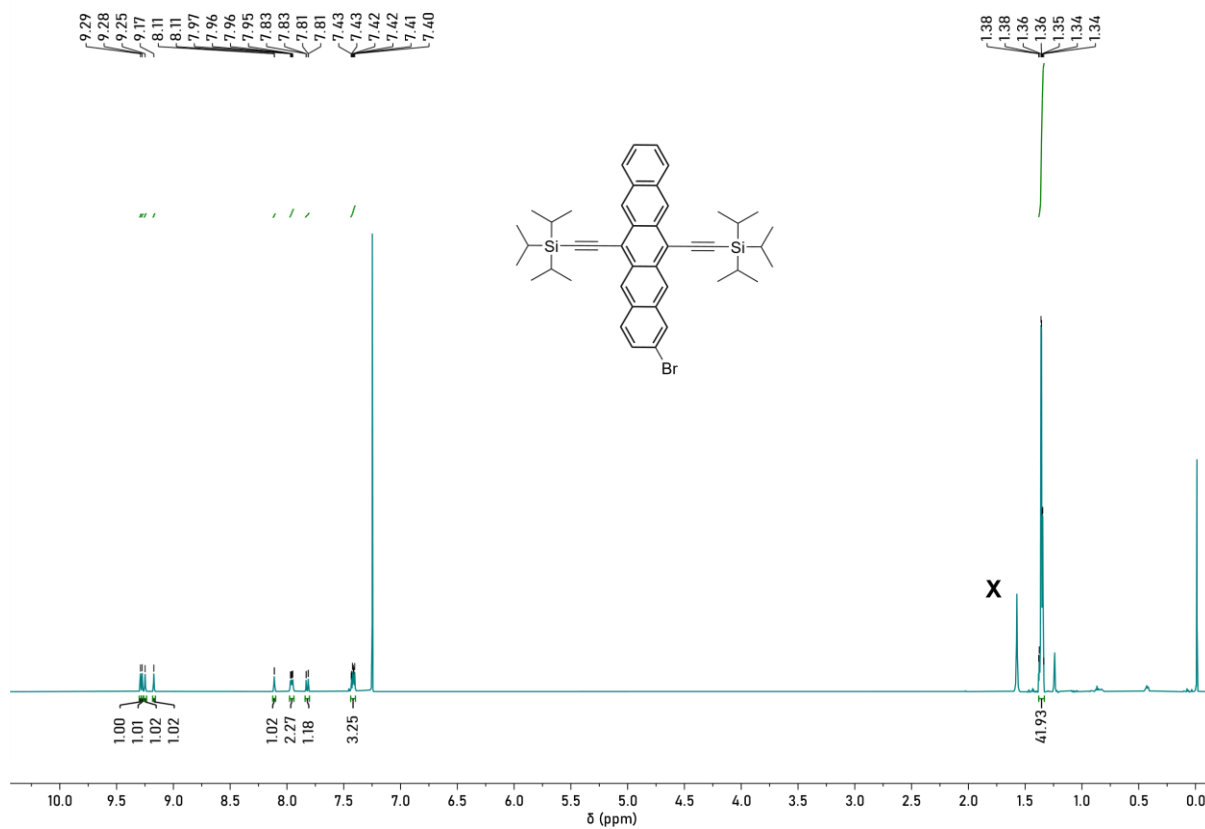

Figure S5.20.  $^1\text{H}$  NMR spectrum of **1** in  $\text{CDCl}_3$  [ $x = \text{H}_2\text{O}$ ]

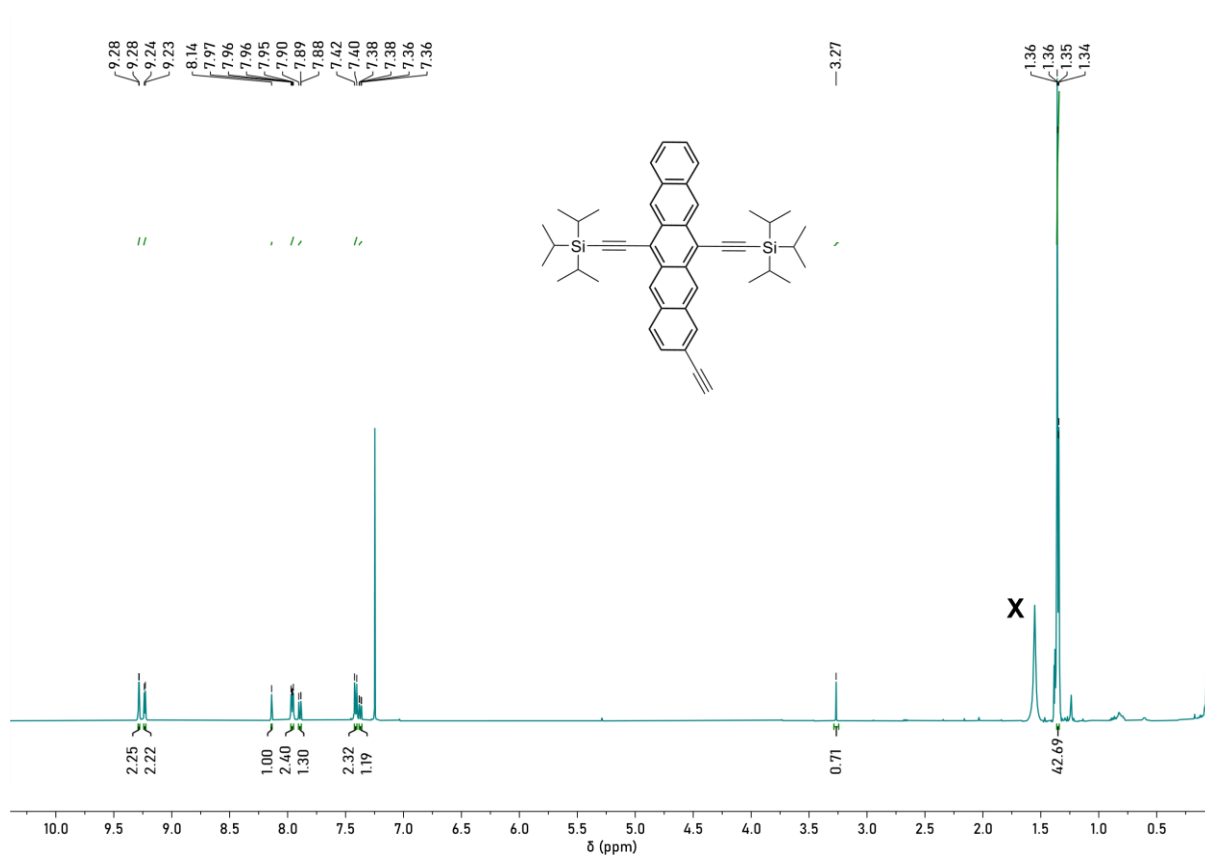

Figure S5.21.  $^1\text{H}$  NMR spectrum of **2** in  $\text{CDCl}_3$  [ $x = \text{H}_2\text{O}$ ]

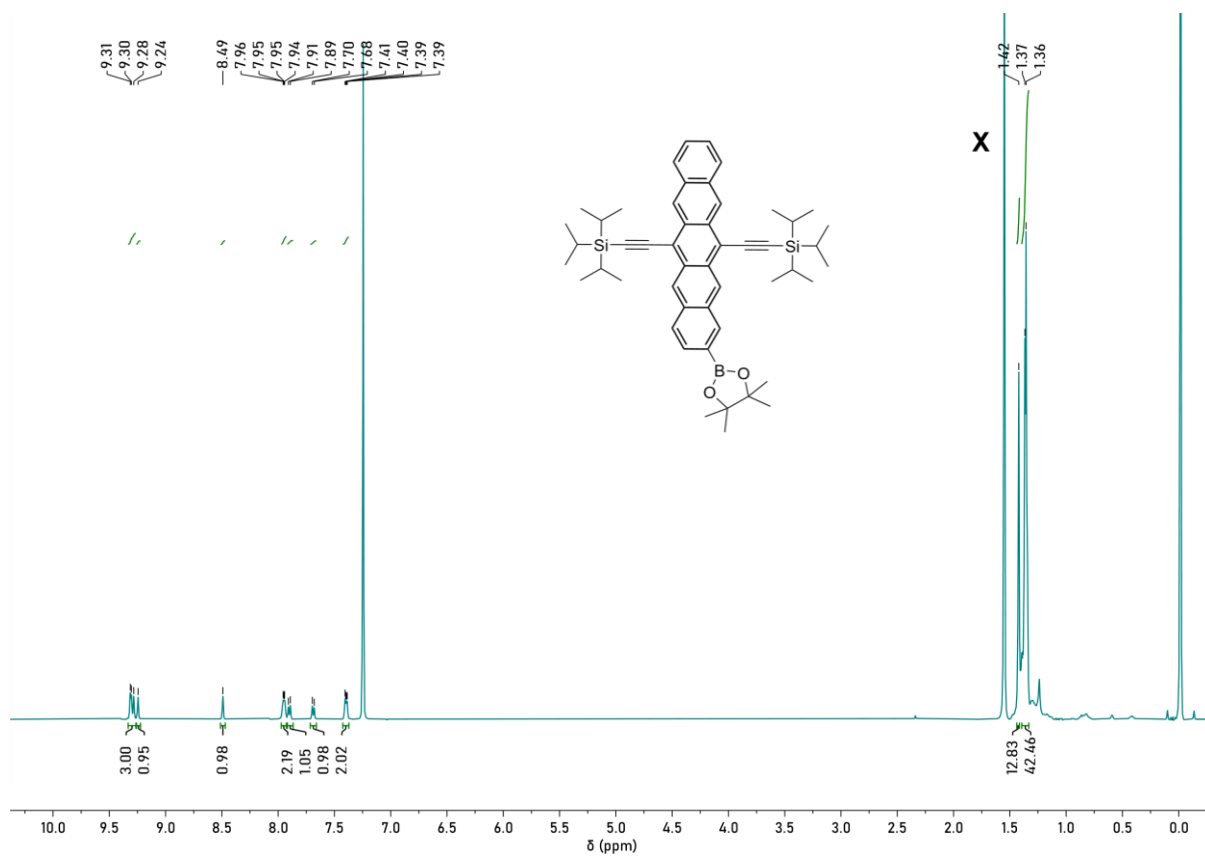

**Figure S5.22.**  $^1\text{H}$  NMR spectrum of **3** in  $\text{CDCl}_3$  [ $x = \text{H}_2\text{O}$ ]

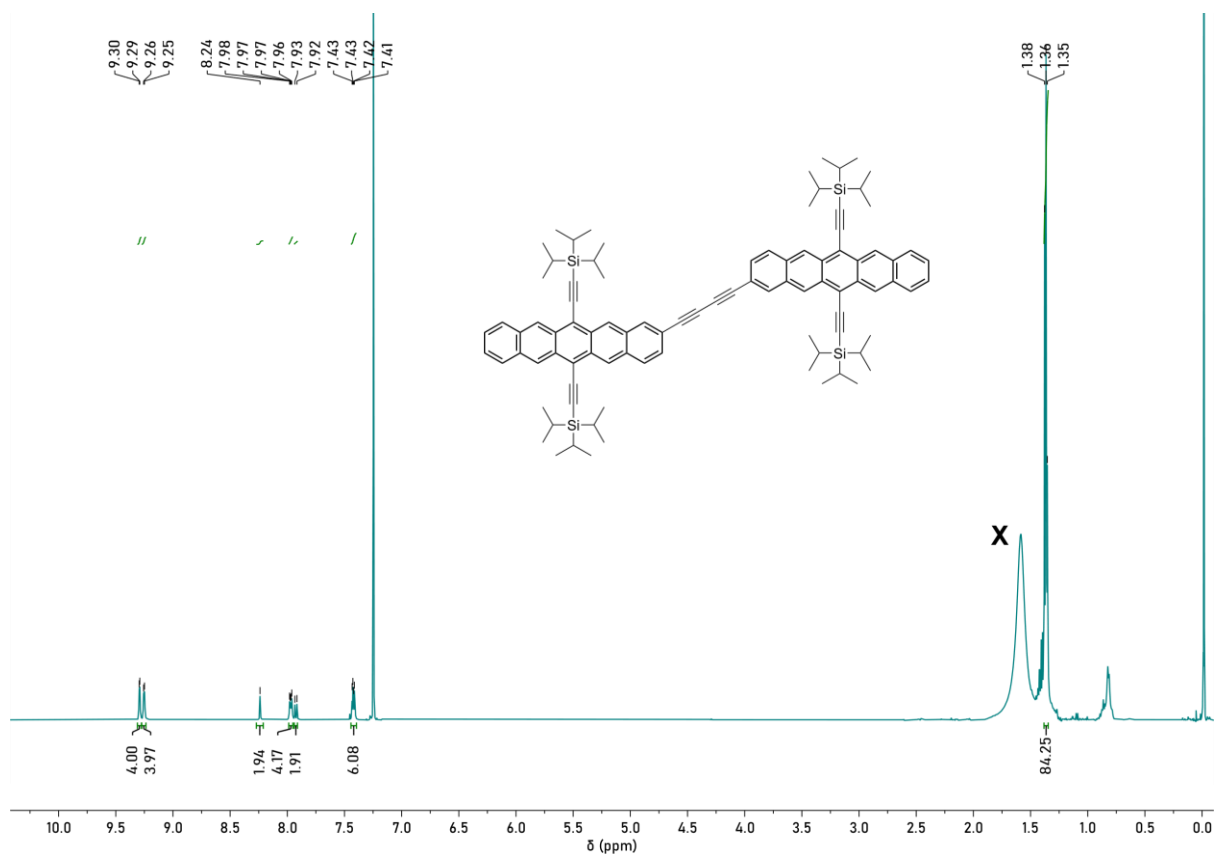

Figure S5.23.  $^1\text{H}$  NMR spectrum of 2Ac-P2 in  $\text{CDCl}_3$  [ $x = \text{H}_2\text{O}$ ]

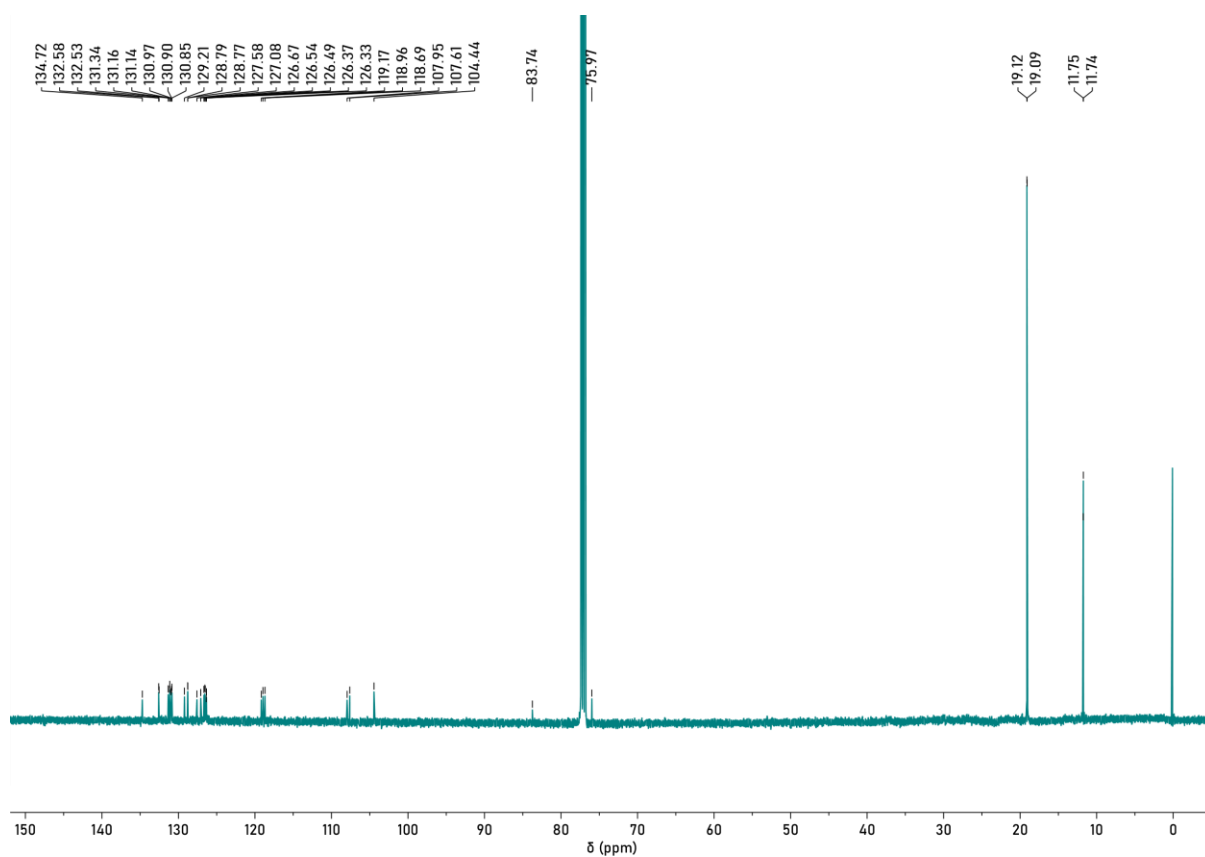

Figure S5.24.  $^{13}\text{C}$  NMR spectrum of 2Ac-P2 in  $\text{CDCl}_3$



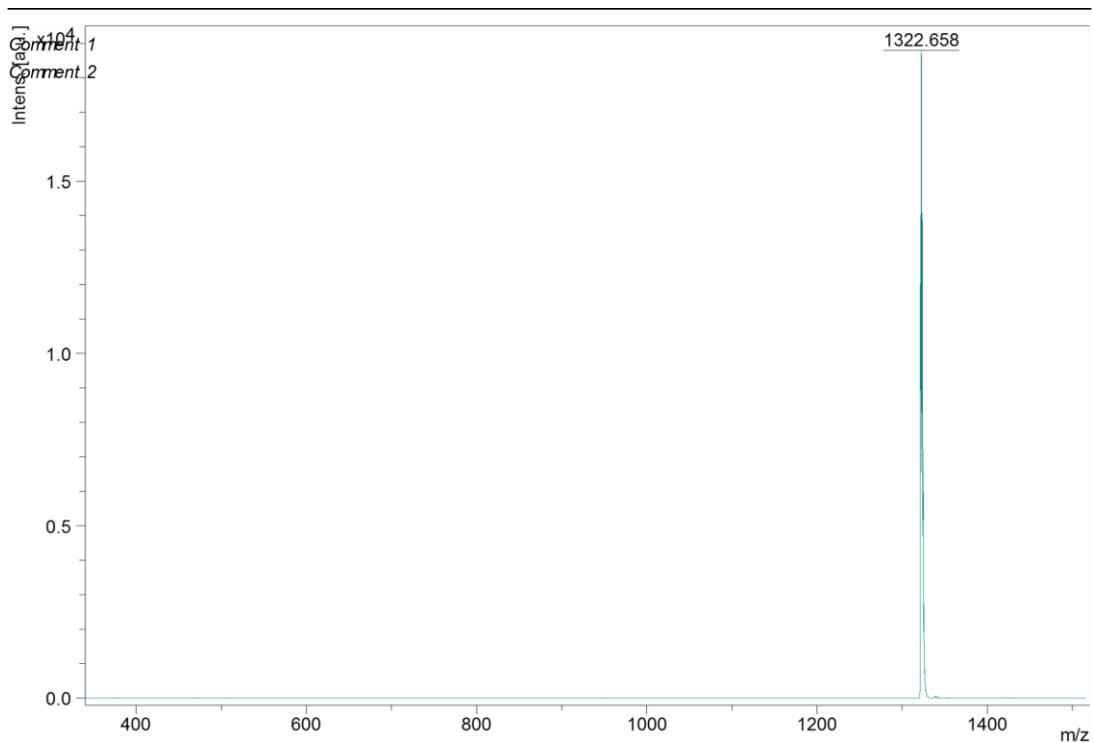

**Acquisition Parameter**

Date of acquisition 2022-05-12T17:17:34.326+02:00  
 Acquisition method name D:\Methods\flexControlMethods\LP\_700-2000\_Da.par  
 Acquisition operation mode Linear  
 Voltage polarity POS  
 Number of shots 2000  
 Name of spectrum used for calibration  
 Calibration reference list used PeptideCalibStandard mono

**Instrument Info**

User JNC  
 Instrument FLEX-PC  
 Instrument type autoflex

**Figure S5.25. MALDI-MS of 2Ac-P2**

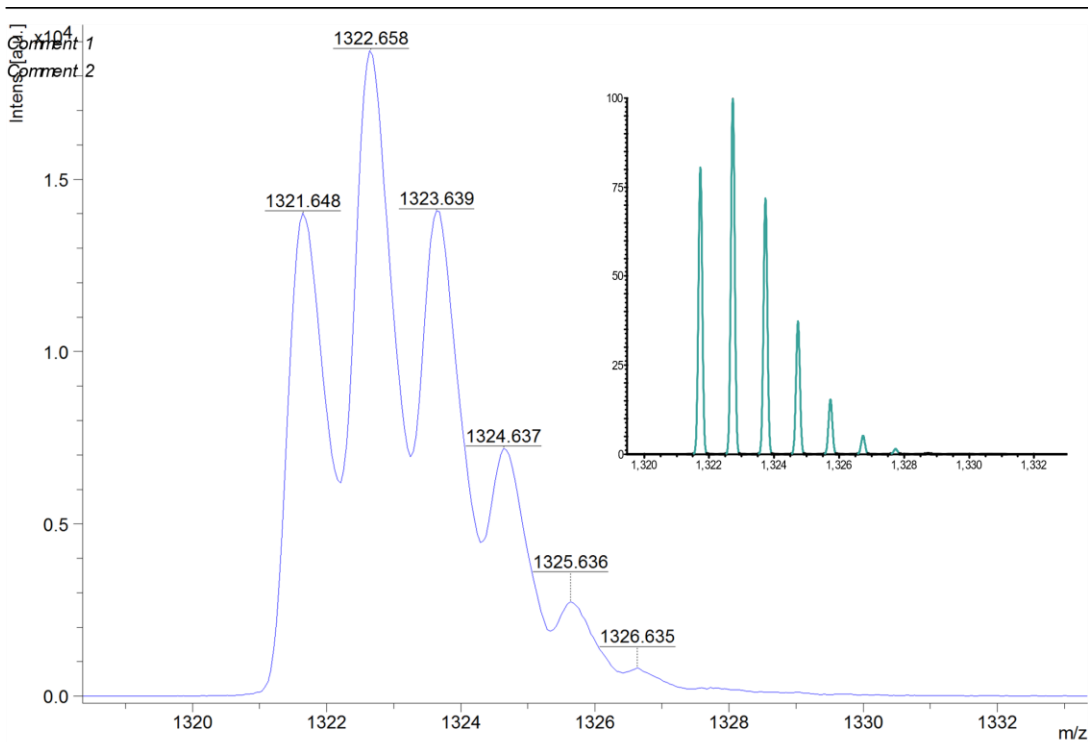

| m/z      | S/N  | Quality Fac. | Res. | Intens. | Area  |
|----------|------|--------------|------|---------|-------|
| 1321.648 |      |              |      | 14003   |       |
| 1322.658 | 1201 |              | 530  | 18738   | 40275 |
| 1323.639 |      |              |      | 14088   |       |
| 1324.637 |      |              |      | 7193    |       |
| 1325.636 |      |              |      | 2741    |       |
| 1326.635 |      |              |      | 823     |       |

#### Acquisition Parameter

Date of acquisition 2022-05-12T17:17:34.326+02:00  
 Acquisition method name D:\Methods\FlexControlMethods\LP\_700-2000\_Da.par

Acquisition operation mode Linear  
 Voltage polarity POS  
 Number of shots 2000  
 Name of spectrum used for calibration  
 Calibration reference list used PeptideCalibStandard mono

#### Instrument Info

User JNC  
 Instrument FLEX-PC  
 Instrument type autoflex

**Figure S5.26.** MALDI-MS isotopic distribution of **2Ac-P2**, ( $[M-H]^+$ ). Simulated isotopic distribution (inset).

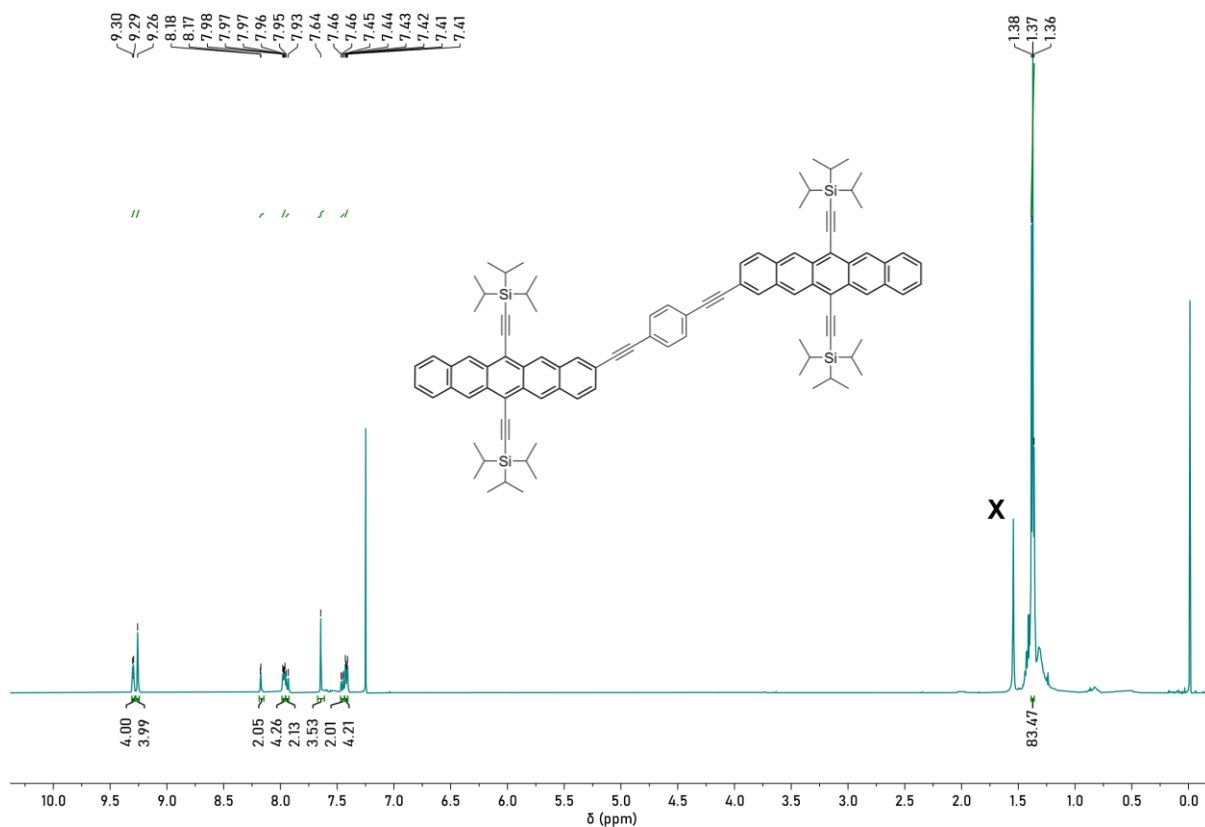

Figure S5.27.  $^1\text{H NMR}$  spectrum of **2Ac-P2Ph** in  $\text{CDCl}_3$  [ $x = \text{H}_2\text{O}$ ]

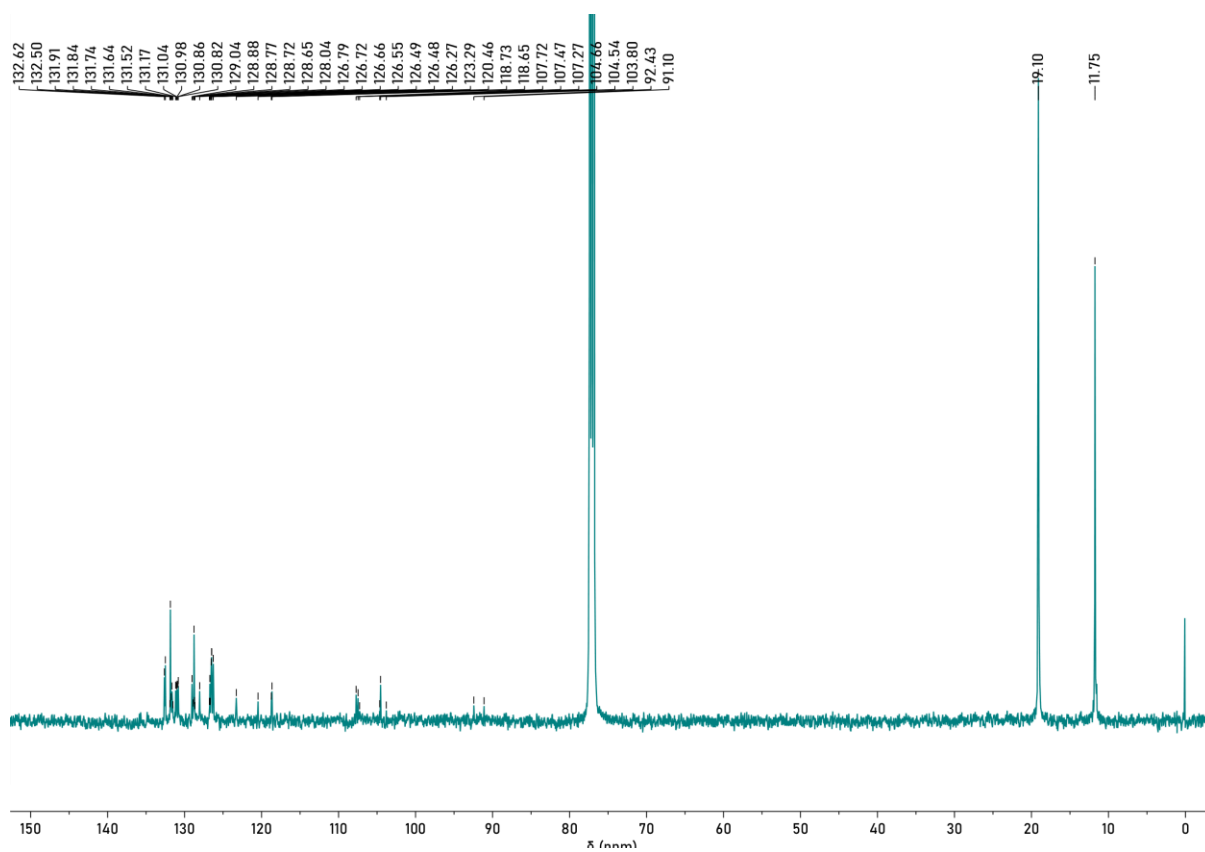

Figure S5.28.  $^{13}\text{C NMR}$  spectrum of **2Ac-P2Ph** in  $\text{CDCl}_3$

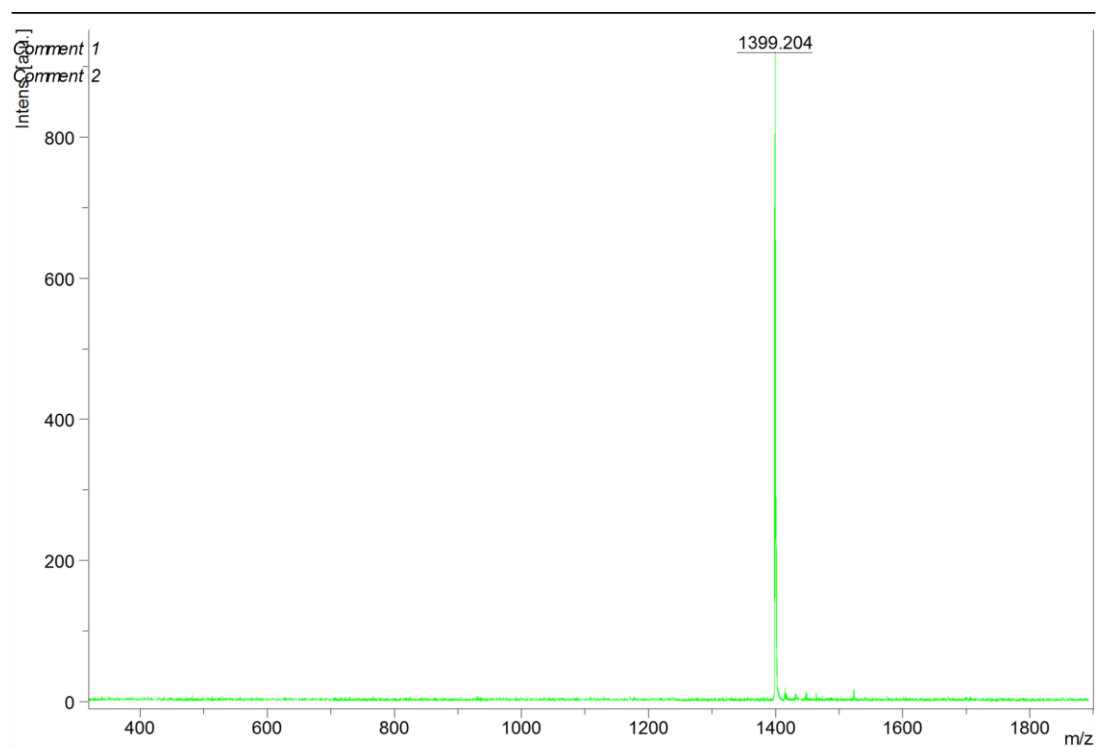

**Acquisition Parameter**

Date of acquisition 2022-02-01T17:05:45.737+05:30  
Acquisition method name D:\Methods\flexControlMethods\LP\_700-2000\_Da.par  
Acquisition operation mode Linear  
Voltage polarity POS  
Number of shots 2000  
Name of spectrum used for calibration  
Calibration reference list used PeptideCalibStandard mono

**Instrument Info**

User JNCASR  
Instrument ATS-00704  
Instrument type autoflex

**Figure S5.29. MALDI-MS of 2Ac-P2Ph**

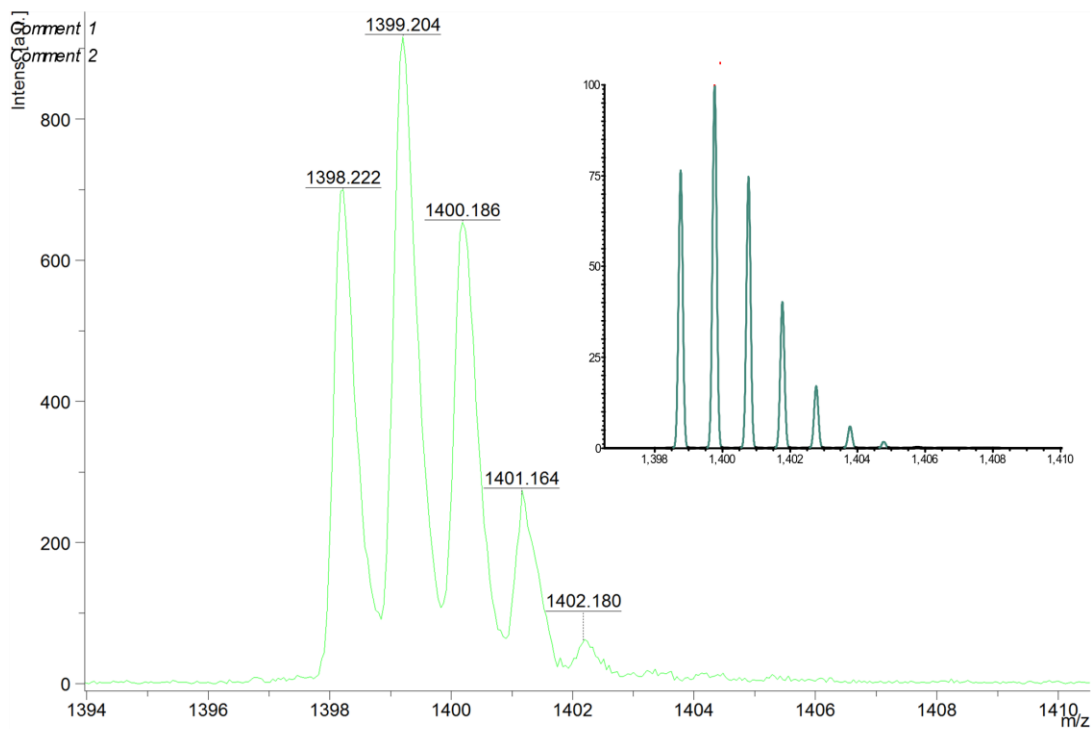

| m/z      | S/N | Quality Fac. | Res. | Intens. | Area |
|----------|-----|--------------|------|---------|------|
| 1398.222 |     |              |      | 700     |      |
| 1399.204 | 135 |              | 608  | 917     | 1314 |
| 1400.186 |     |              |      | 654     |      |
| 1401.164 |     |              |      | 267     |      |
| 1402.180 |     |              |      | 60.4    |      |

**Acquisition Parameter**

Date of acquisition: 2022-02-01T17:05:45.737+05:30  
 Acquisition method name: D:\Methods\flexControlMethods\LP\_700-2000\_Da.par  
 Acquisition operation mode: Linear  
 Voltage polarity: POS  
 Number of shots: 2000  
 Name of spectrum used for calibration:  
 Calibration reference list used: PeptideCalibStandard mono

**Instrument Info**

User: JNCASR  
 Instrument: ATS-00704  
 Instrument type: autoflex

**Figure S5.30.** MALDI-MS isotopic distribution of **2Ac-P2Ph** ( $M^+$ ). Simulated isotopic distribution (inset).

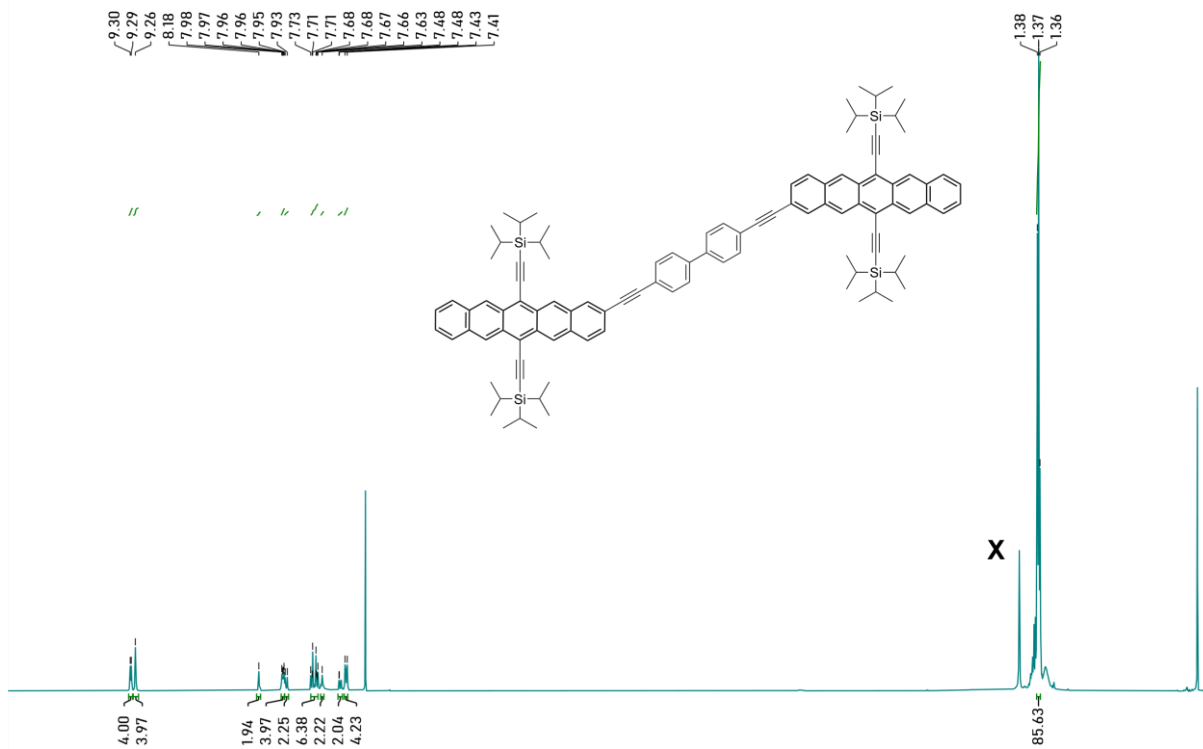

Figure S5.31. <sup>1</sup>H NMR spectrum of **2Ac-P2BP** in CDCl<sub>3</sub> [x = H<sub>2</sub>O]

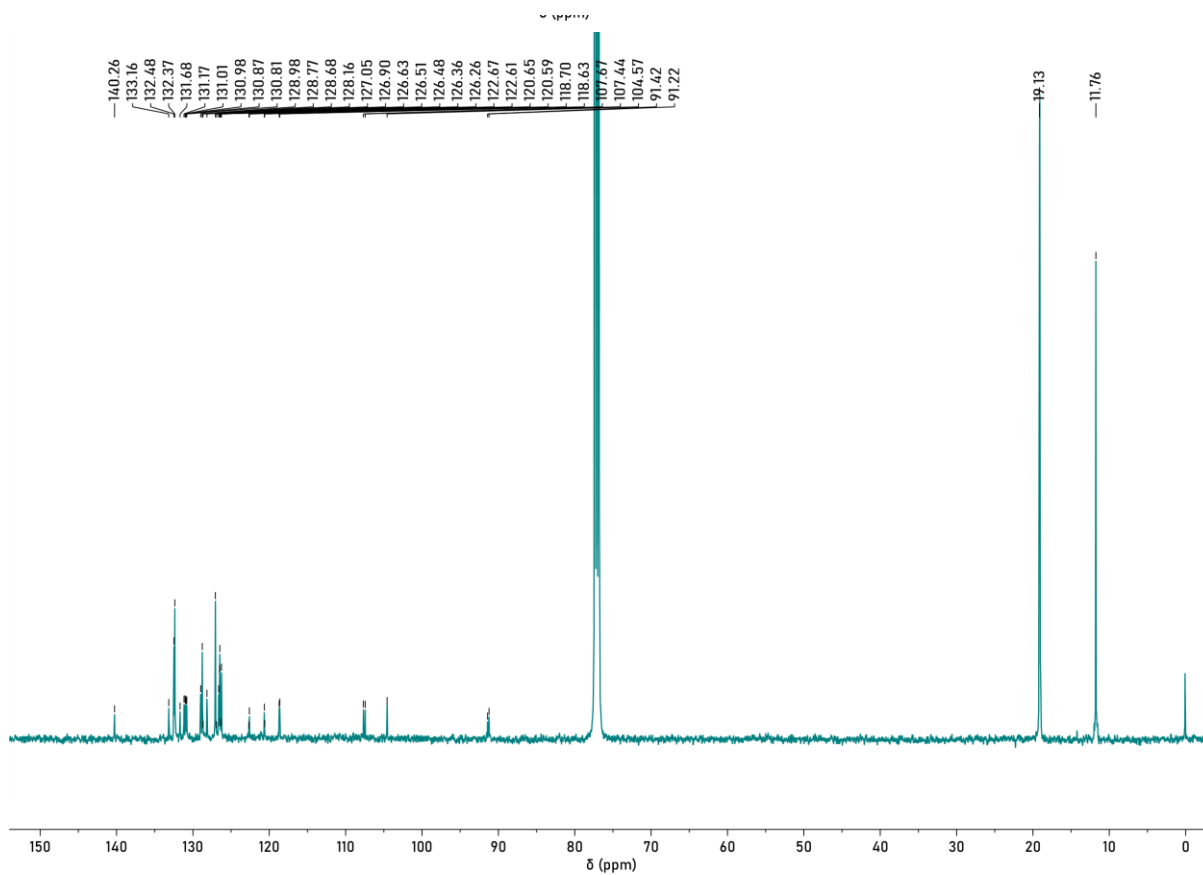

Figure S5.32. <sup>13</sup>C NMR spectrum of **2Ac-P2BP** in CDCl<sub>3</sub>

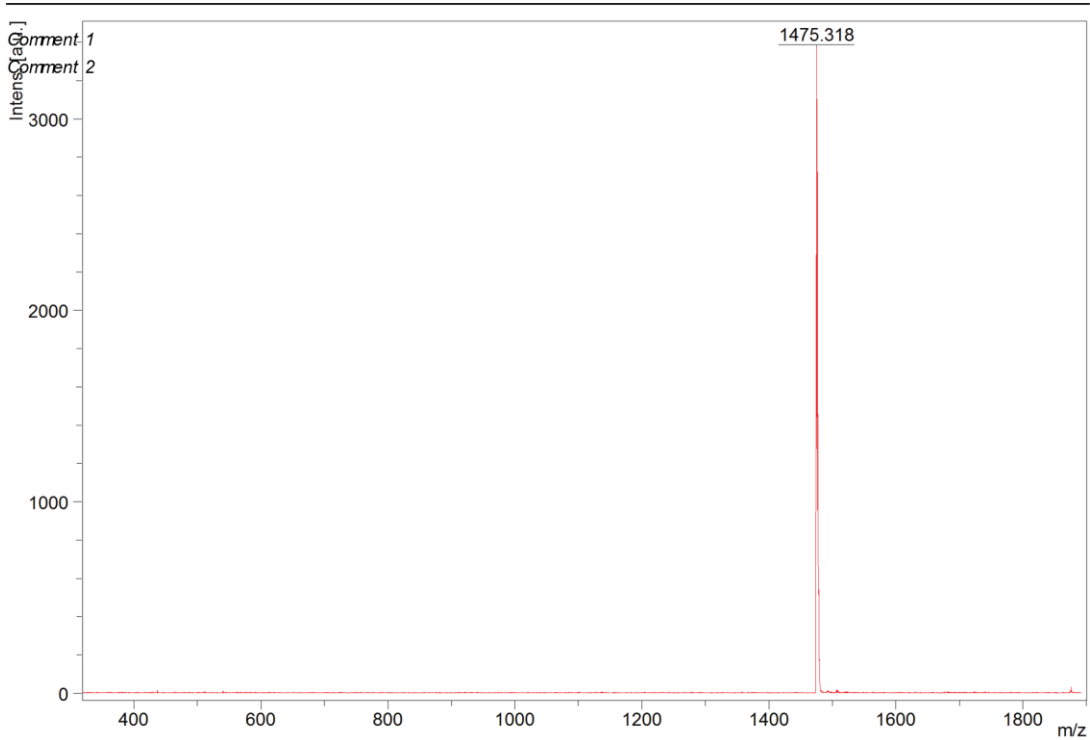

**Acquisition Parameter**

Date of acquisition 2022-02-01T17:06:39.729+05:30  
Acquisition method name D:\Methods\flexControlMethods\LP\_700-2000\_Da.par  
Acquisition operation mode Linear  
Voltage polarity POS  
Number of shots 2000  
Name of spectrum used for calibration  
Calibration reference list used PeptideCalibStandard mono

**Instrument Info**

User JNCASR  
Instrument ATS-00704  
Instrument type autoflex

**Figure S5.33. MALDI-MS of 2Ac-P2BP**

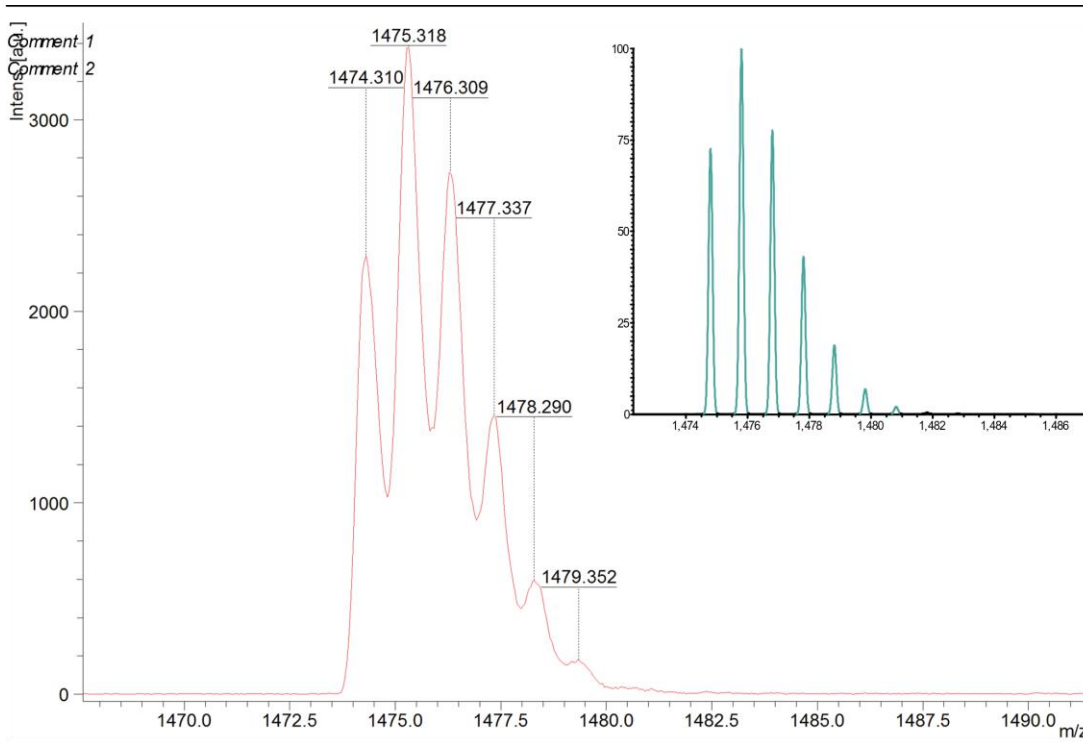

| m/z      | S/N | Quality Fac. | Res. | Intens. | Area |
|----------|-----|--------------|------|---------|------|
| 1474.310 |     |              |      | 2290    |      |
| 1475.318 |     |              |      | 3377    |      |
| 1476.309 | 398 |              | 597  | 2727    | 7374 |
| 1477.337 |     |              |      | 1457    |      |
| 1478.290 |     |              |      | 592     |      |
| 1479.352 |     |              |      | 178     |      |

**Acquisition Parameter**

Date of acquisition: 2022-02-01T17:06:39.729+05:30  
 Acquisition method name: D:\Methods\flexControlMethods\LP\_700-2000\_Da.par  
 Acquisition operation mode: Linear  
 Voltage polarity: POS  
 Number of shots: 2000  
 Name of spectrum used for calibration:  
 Calibration reference list used: PeptideCalibStandard mono

**Instrument Info**

User: JNCASR  
 Instrument: ATS-00704  
 Instrument type: autoflex

**Figure S5.34.** MALDI-MS isotopic distribution of **2Ac-P2BP**, ( $M^+$ ). Simulated isotopic distribution (inset).



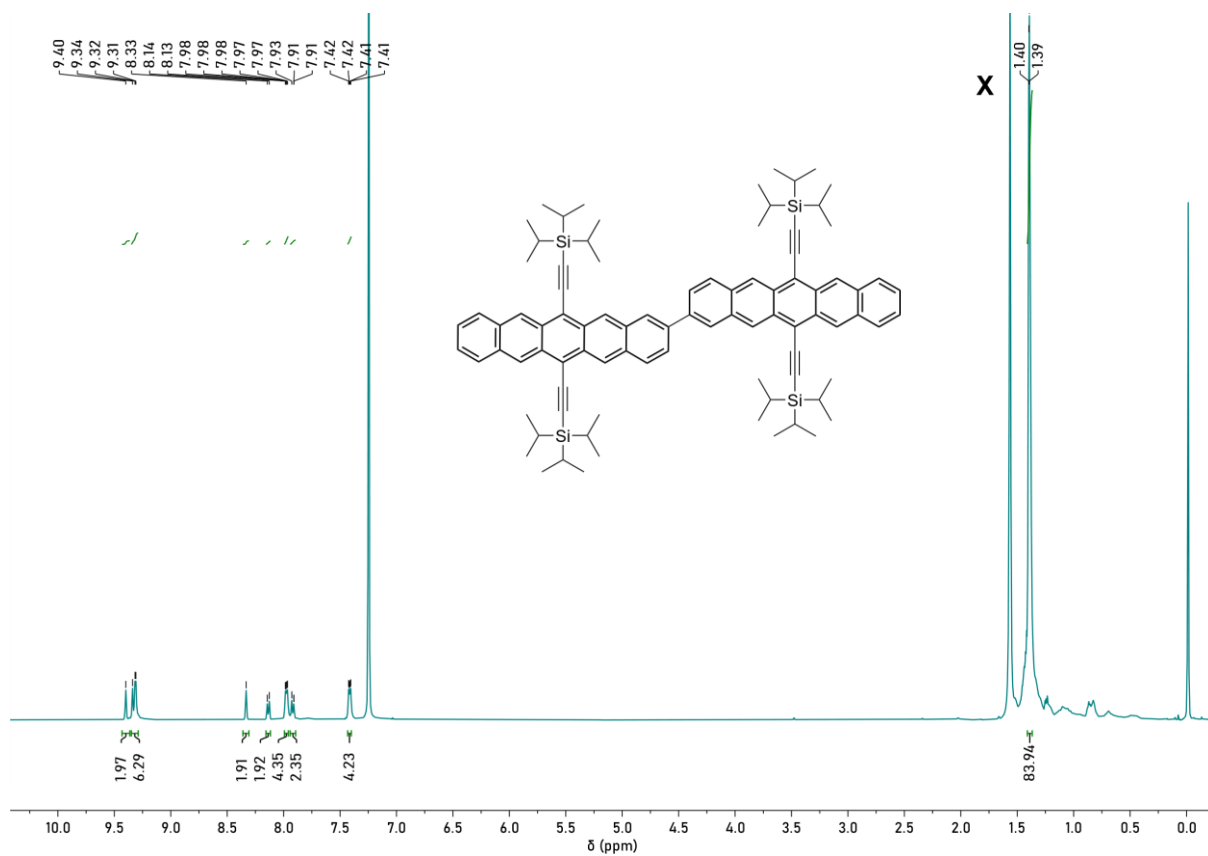

Figure S5.35.  $^1\text{H}$  NMR spectrum of 2-P2 in  $\text{CDCl}_3$  [ $x = \text{H}_2\text{O}$ ]

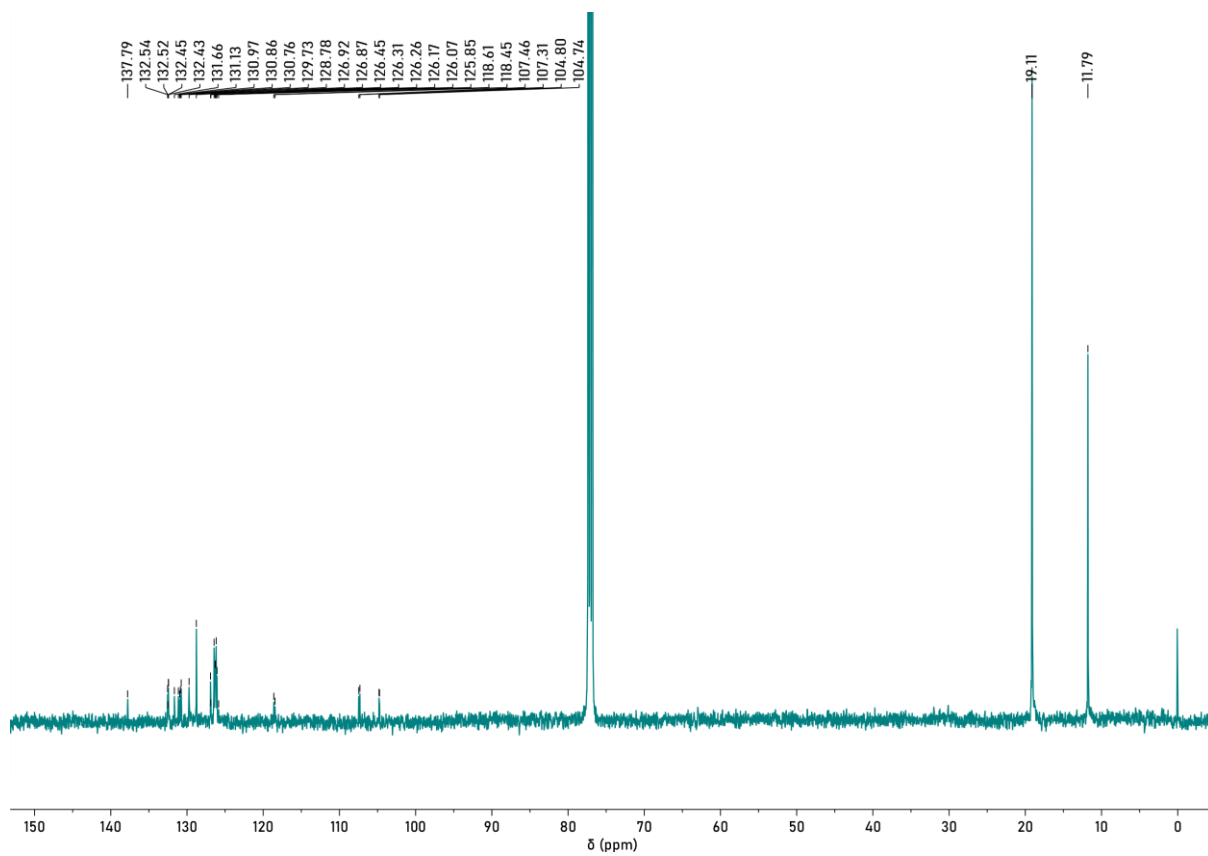

Figure S5.36.  $^{13}\text{C}$  NMR spectrum of 2-P2 in  $\text{CDCl}_3$

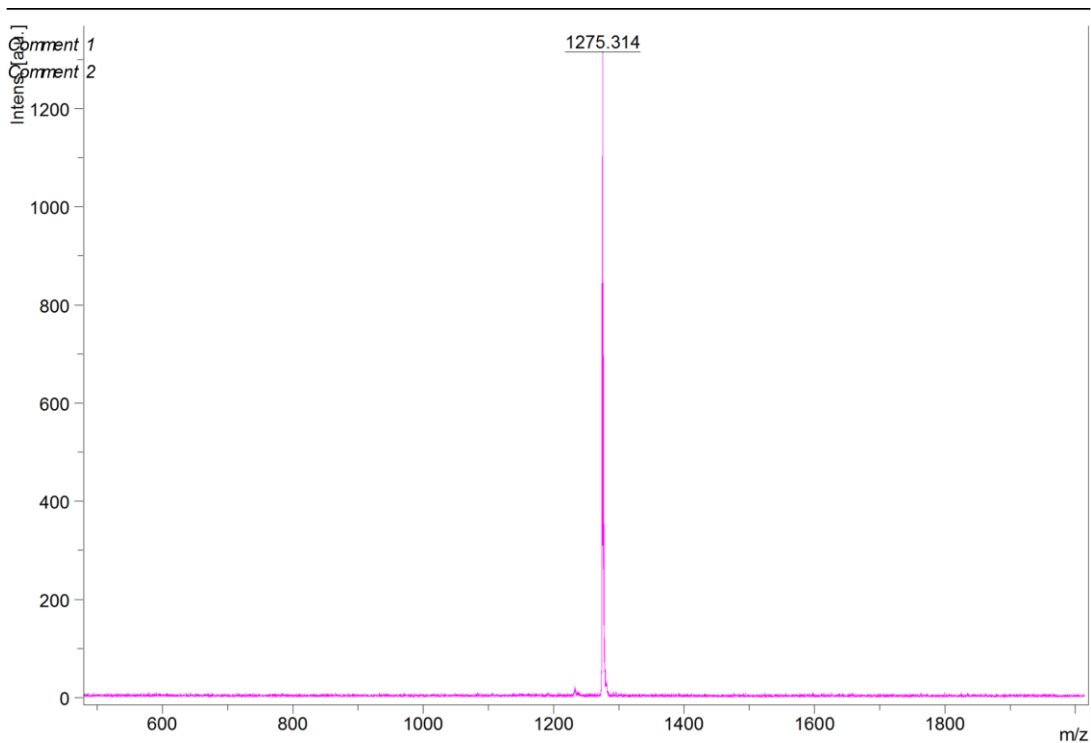

**Acquisition Parameter**

Date of acquisition 2021-09-28T12:55:11.141+05:30  
Acquisition method name D:\Methods\flexControlMethods\LP\_700-2000\_Da.par  
Acquisition operation mode Linear  
Voltage polarity POS  
Number of shots 2000  
Name of spectrum used for calibration  
Calibration reference list used PeptideCalibStandard mono

**Instrument Info**

User JNCASR  
Instrument ATS-00704  
Instrument type autoflex

**Figure S5.37. MALDI-MS of 2-P2**

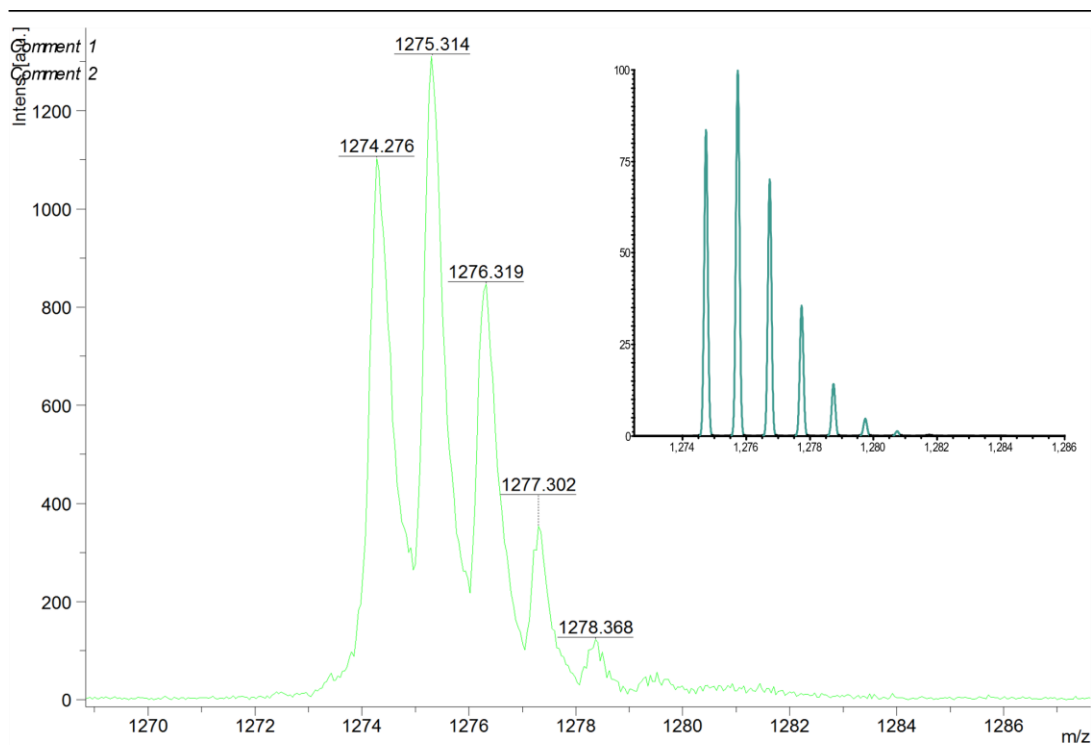

| m/z      | S/N | Quality Fac. | Res. | Intens. | Area |
|----------|-----|--------------|------|---------|------|
| 1274.276 |     |              |      | 1103    |      |
| 1275.314 | 180 |              | 554  | 1311    | 2098 |
| 1276.319 |     |              |      | 846     |      |
| 1277.302 |     |              |      | 353     |      |
| 1278.368 |     |              |      | 123     |      |

**Acquisition Parameter**

Date of acquisition: 2021-09-28T12:55:11.141+05:30  
 Acquisition method name: D:\Methods\flexControlMethods\LP\_700-2000\_Da.par  
 Acquisition operation mode: Linear  
 Voltage polarity: POS  
 Number of shots: 2000  
 Name of spectrum used for calibration: PeptideCalibStandard mono  
 Calibration reference list used: PeptideCalibStandard mono

**Instrument Info**

User: JNCASR  
 Instrument: ATS-00704  
 Instrument type: autoflex

**Figure S5.38.** MALDI-MS isotopic distribution of **2-P2**, ( $M^+$ ). Simulated isotopic distribution (inset).

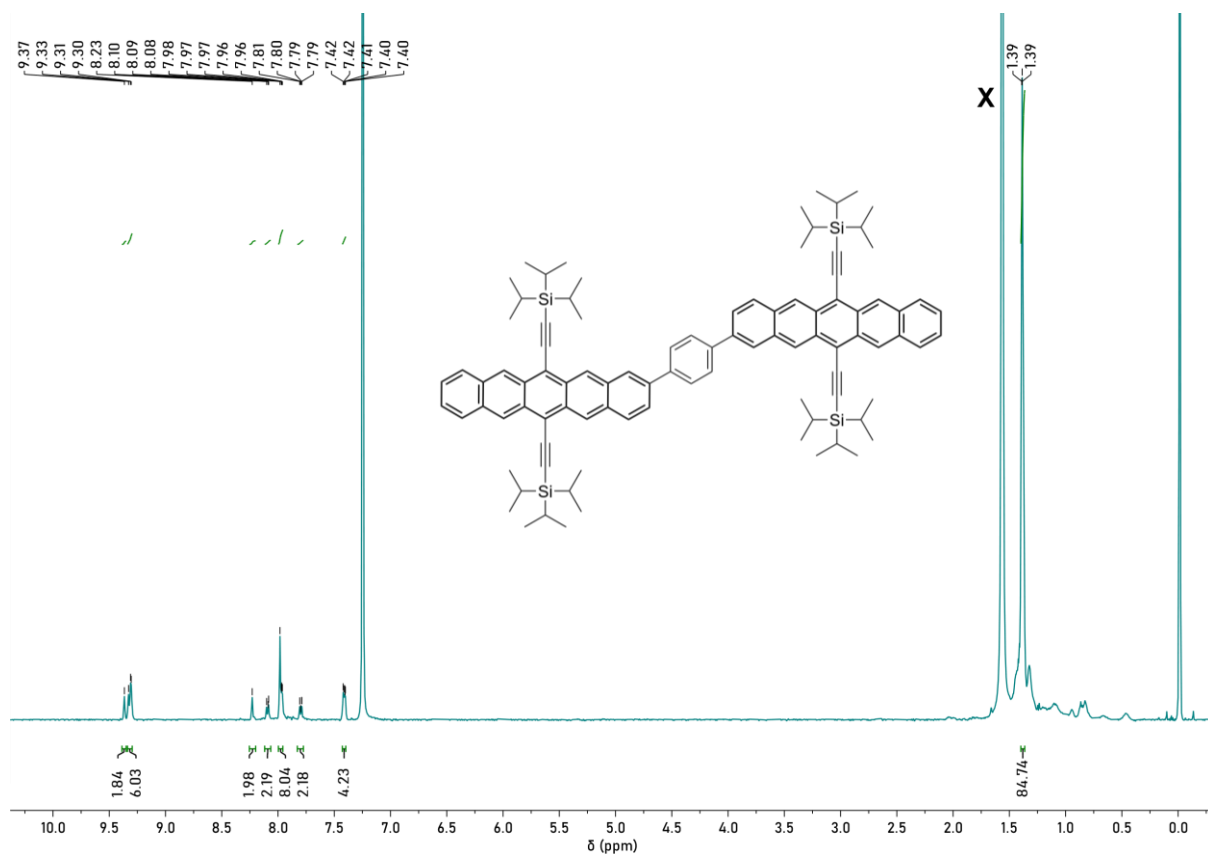

Figure S5.39.  $^1\text{H}$  NMR spectrum of **2-P2Ph** in  $\text{CDCl}_3$  [ $x = \text{H}_2\text{O}$ ]

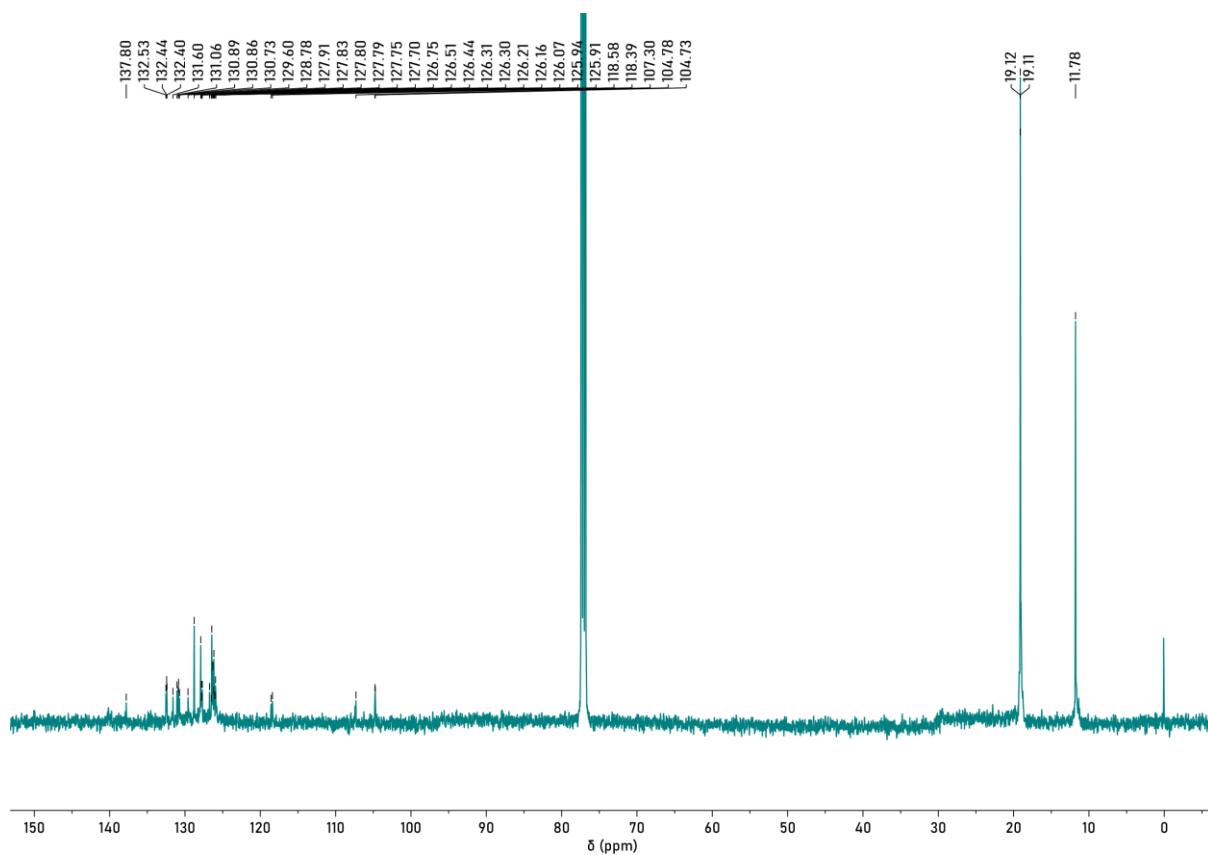

Figure S5.40.  $^{13}\text{C}$  NMR spectrum of **2-P2Ph** in  $\text{CDCl}_3$

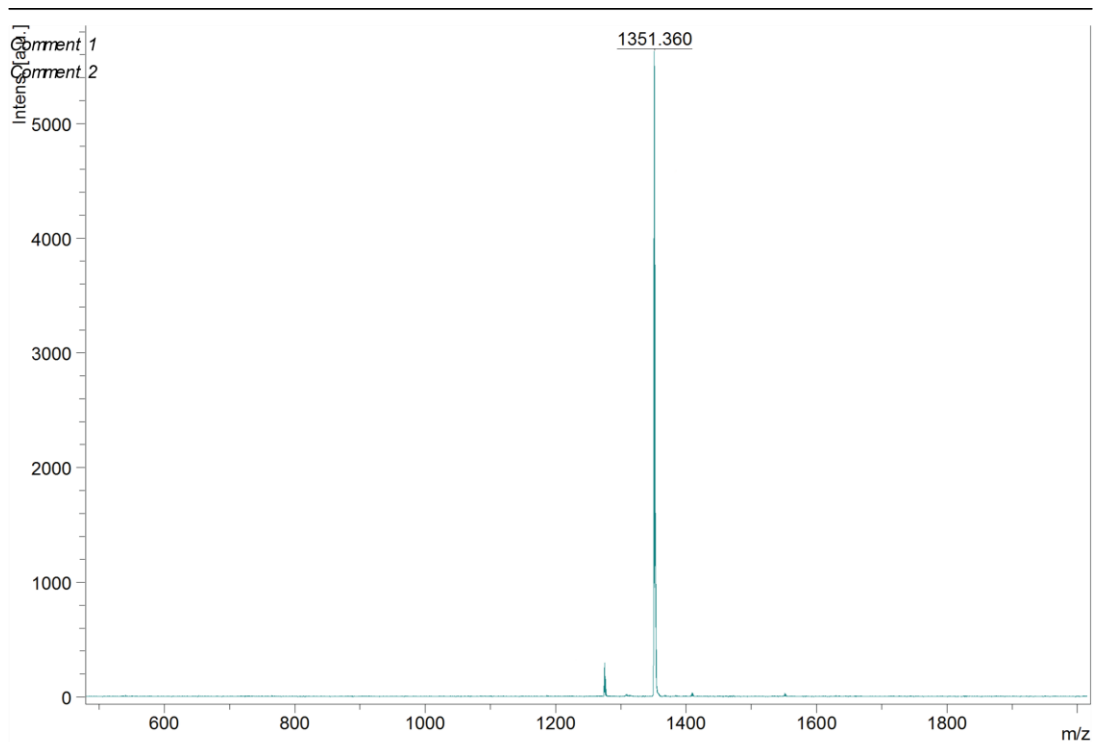

**Acquisition Parameter**

*Date of acquisition* 2021-09-28T12:55:26.813+05:30  
*Acquisition method name* D:\Methods\flexControl\Methods\LP\_700-2000\_Da.par  
*Acquisition operation mode* Linear  
*Voltage polarity* POS  
*Number of shots* 2000  
*Name of spectrum used for calibration*  
*Calibration reference list used* PeptideCalibStandard mono

**Instrument Info**

*User* JNCASR  
*Instrument* ATS-00704  
*Instrument type* autoflex

**Figure S5.41. MALDI-MS of 2-P2Ph**

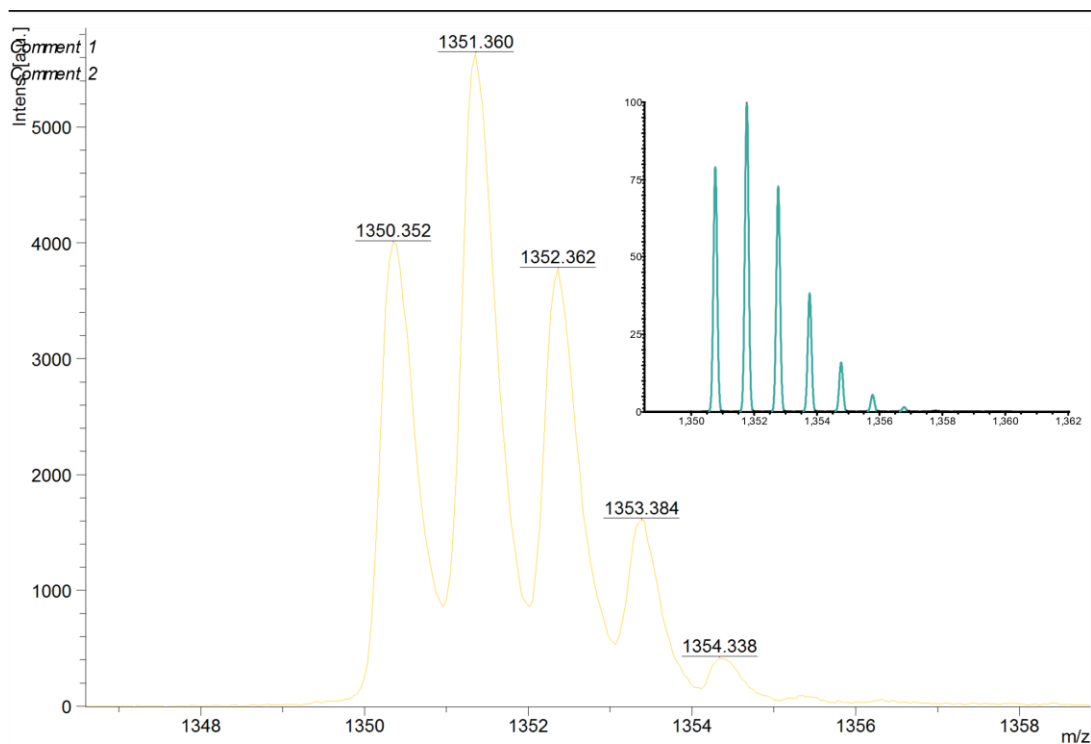

| m/z      | S/N | Quality Fac. | Res. | Intens. | Area |
|----------|-----|--------------|------|---------|------|
| 1350.352 |     |              |      | 3998    |      |
| 1351.360 | 678 |              | 586  | 5632    | 8432 |
| 1352.362 |     |              |      | 3771    |      |
| 1353.384 |     |              |      | 1605    |      |
| 1354.338 |     |              |      | 413     |      |

#### Acquisition Parameter

Date of acquisition 2021-09-28T12:55:26.813+05:30  
 Acquisition method name D:\Methods\flexControlMethods\LP\_700-2000\_Da.par  
 Acquisition operation mode Linear  
 Voltage polarity POS  
 Number of shots 2000  
 Name of spectrum used for calibration  
 Calibration reference list used PeptideCalibStandard mono

#### Instrument Info

User JNCASR  
 Instrument ATS-00704  
 Instrument type autoflex

**Figure S5.42.** MALDI-MS isotopic distribution of **2-P2Ph**, ( $M^+$ ). Simulated isotopic distribution (inset).

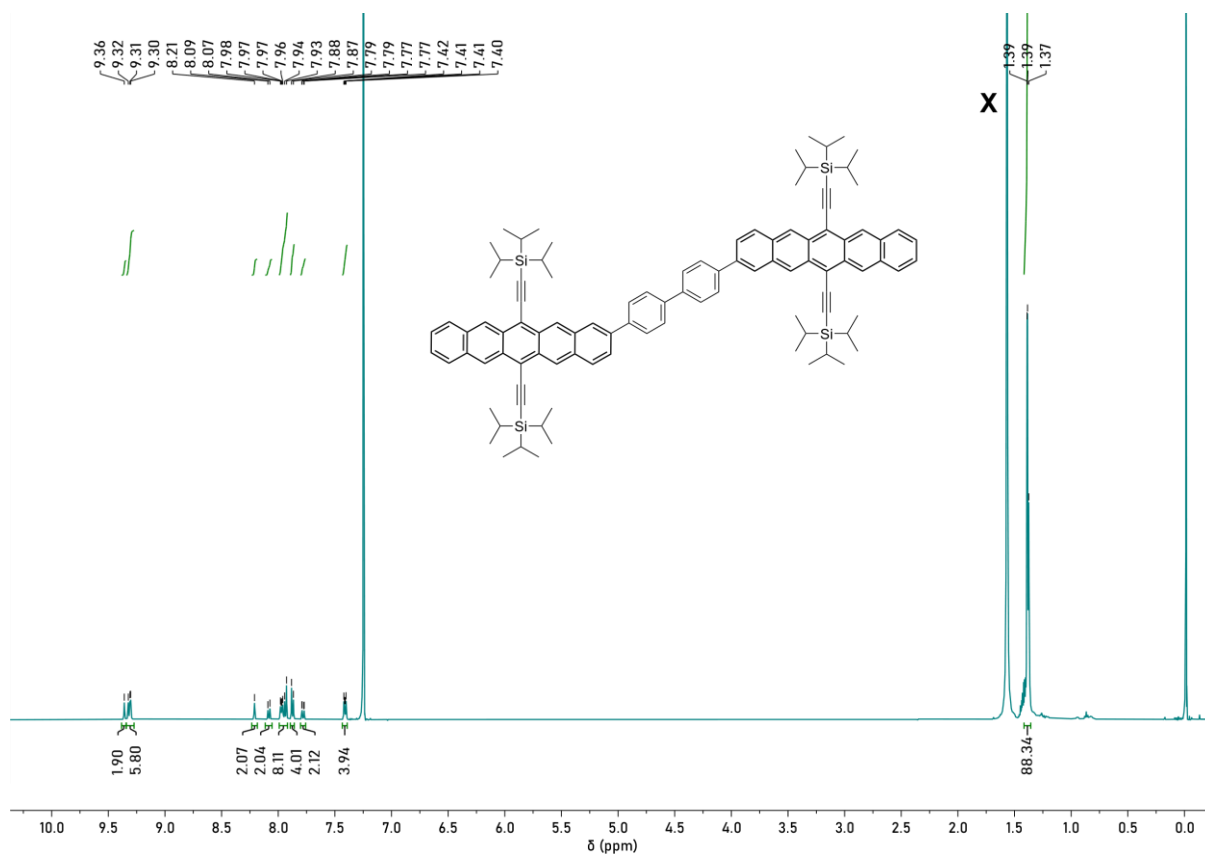

**Figure S5.43.**  $^1\text{H}$  NMR spectrum of 2-P2BP in  $\text{CDCl}_3$  [ $x = \text{H}_2\text{O}$ ]

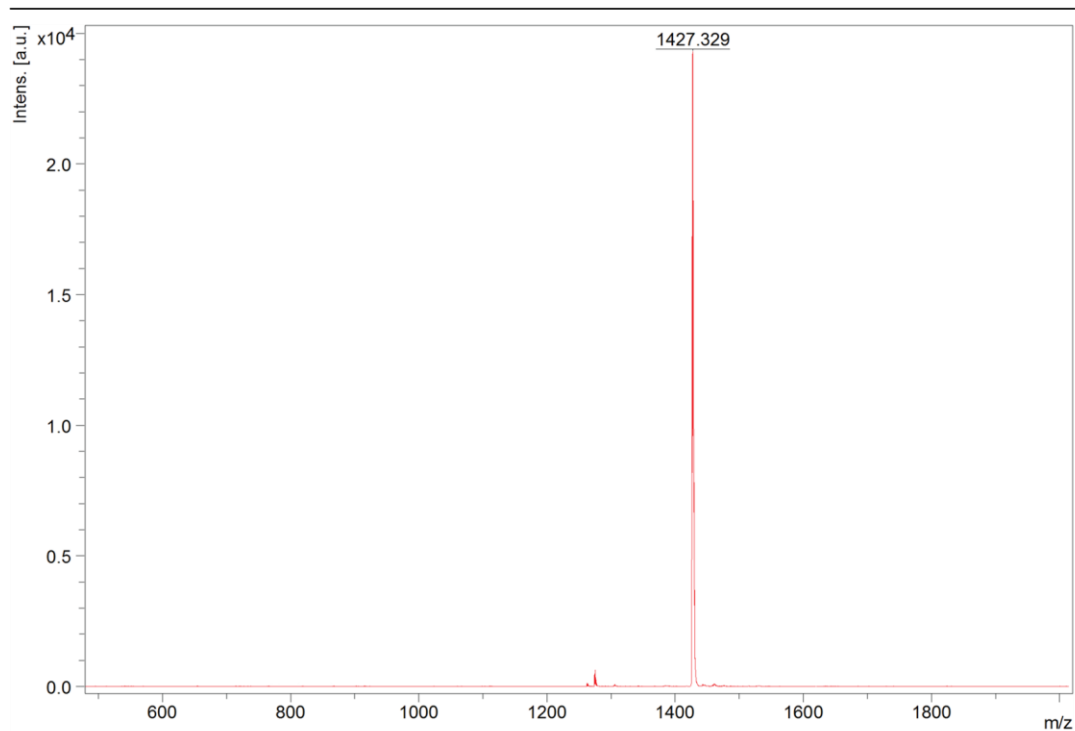

**Acquisition Parameter**

Date of acquisition 2021-09-28T12:53:26.989+05:30  
Acquisition method name D:\Methods\flexControlMethods\LP\_700-2000\_Da.par  
Acquisition operation mode Linear  
Voltage polarity POS  
Number of shots 2000  
Name of spectrum used for calibration  
Calibration reference list used PeptideCalibStandard mono

**Instrument Info**

User JNCASR  
Instrument ATS-00704  
Instrument type autoflex

**Figure S5.44. MALDI-MS of 2-P2BP**



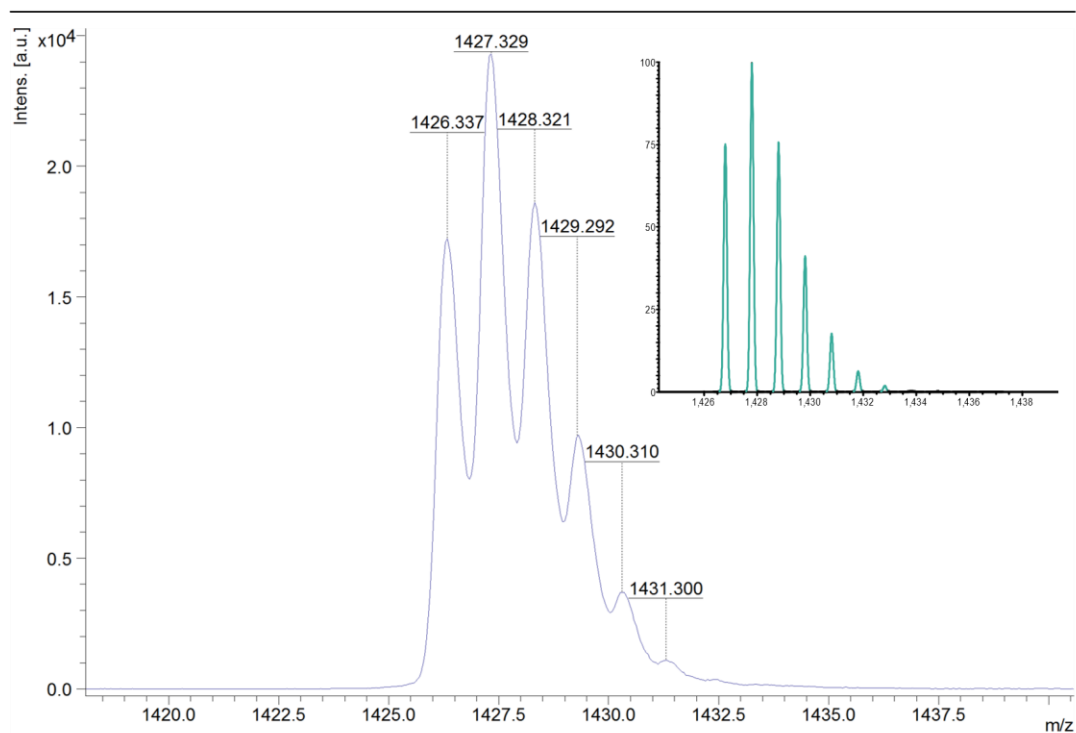

| m/z      | S/N  | Quality Fac. | Res. | Intens. | Area  |
|----------|------|--------------|------|---------|-------|
| 1426.337 |      |              |      | 17237   |       |
| 1427.329 | 2667 |              | 576  | 24313   | 52861 |
| 1428.321 |      |              |      | 18614   |       |
| 1429.292 |      |              |      | 9663    |       |
| 1430.310 |      |              |      | 3686    |       |
| 1431.300 |      |              |      | 1095    |       |

**Acquisition Parameter**

Date of acquisition 2021-09-28T12:53:26.989+05:30  
 Acquisition method name D:\Methods\flexControlMethods\LP\_700-2000\_Da.par  
 Acquisition operation mode Linear  
 Voltage polarity POS  
 Number of shots 2000  
 Name of spectrum used for calibration  
 Calibration reference list used PeptideCalibStandard mono

**Instrument Info**

User JNCASR  
 Instrument ATS-00704  
 Instrument type autoflex

**Figure S5.45.** MALDI-MS isotopic distribution of 2-P2BP, ( $M^+$ ). Simulated isotopic distribution (inset).

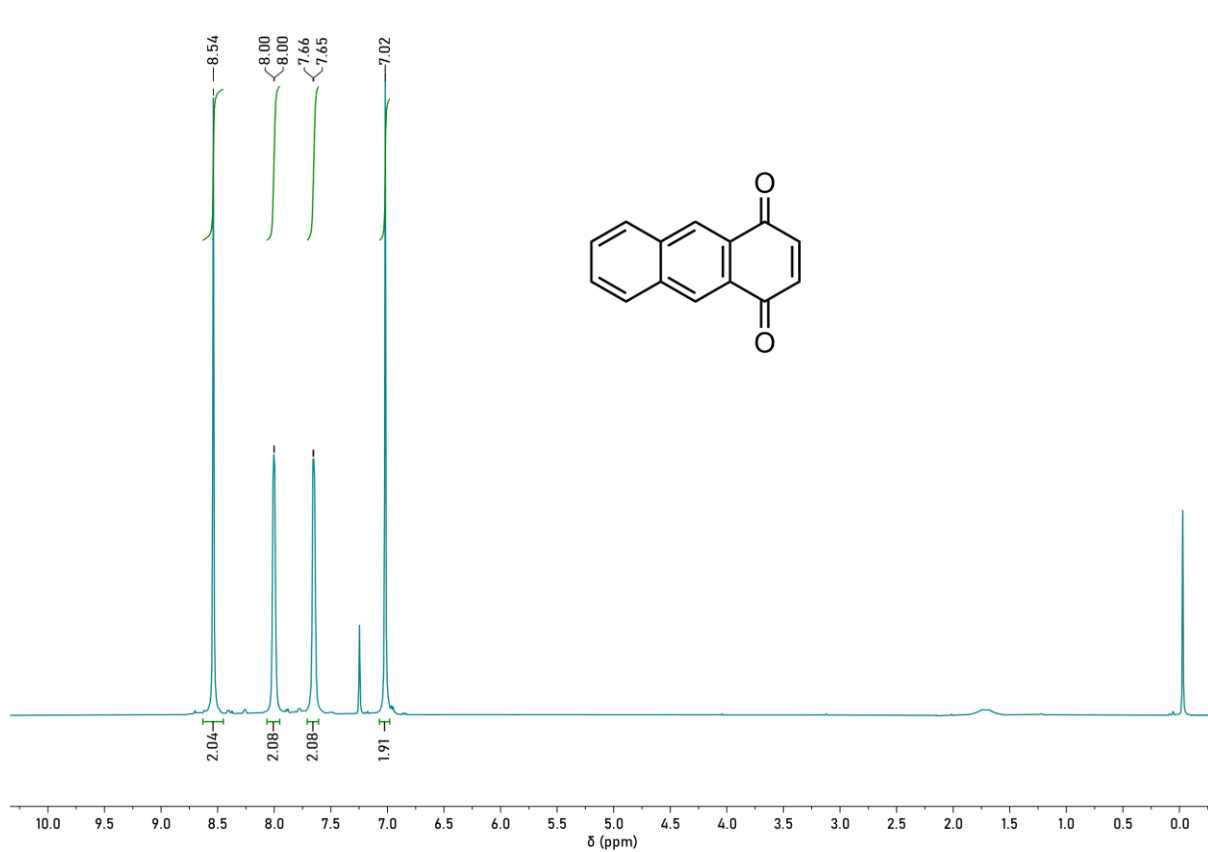

**Figure S5.46.**  $^1\text{H}$  NMR spectrum of Anthracene 1,4 dione in  $\text{CDCl}_3$  [ $x = \text{H}_2\text{O}$ ]

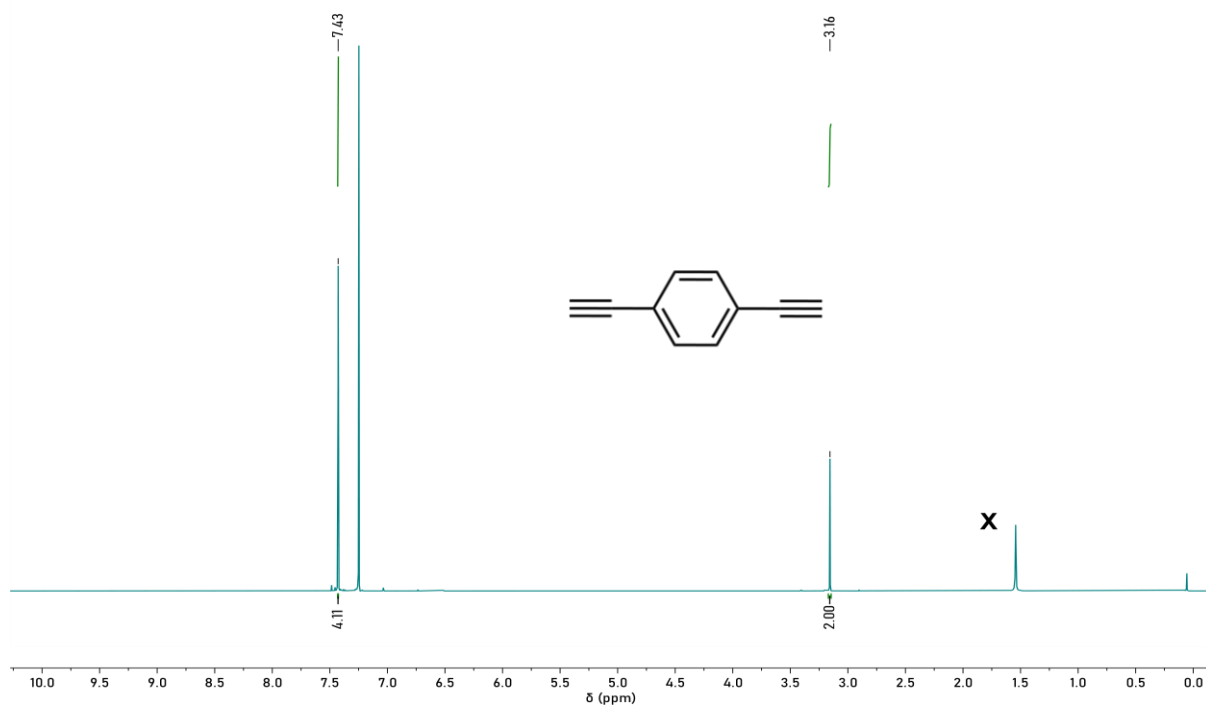

Figure S5.47.  $^1\text{H NMR}$  spectrum of **5b** ( $n=1$ ) in  $\text{CDCl}_3$  [ $x = \text{H}_2\text{O}$ ]

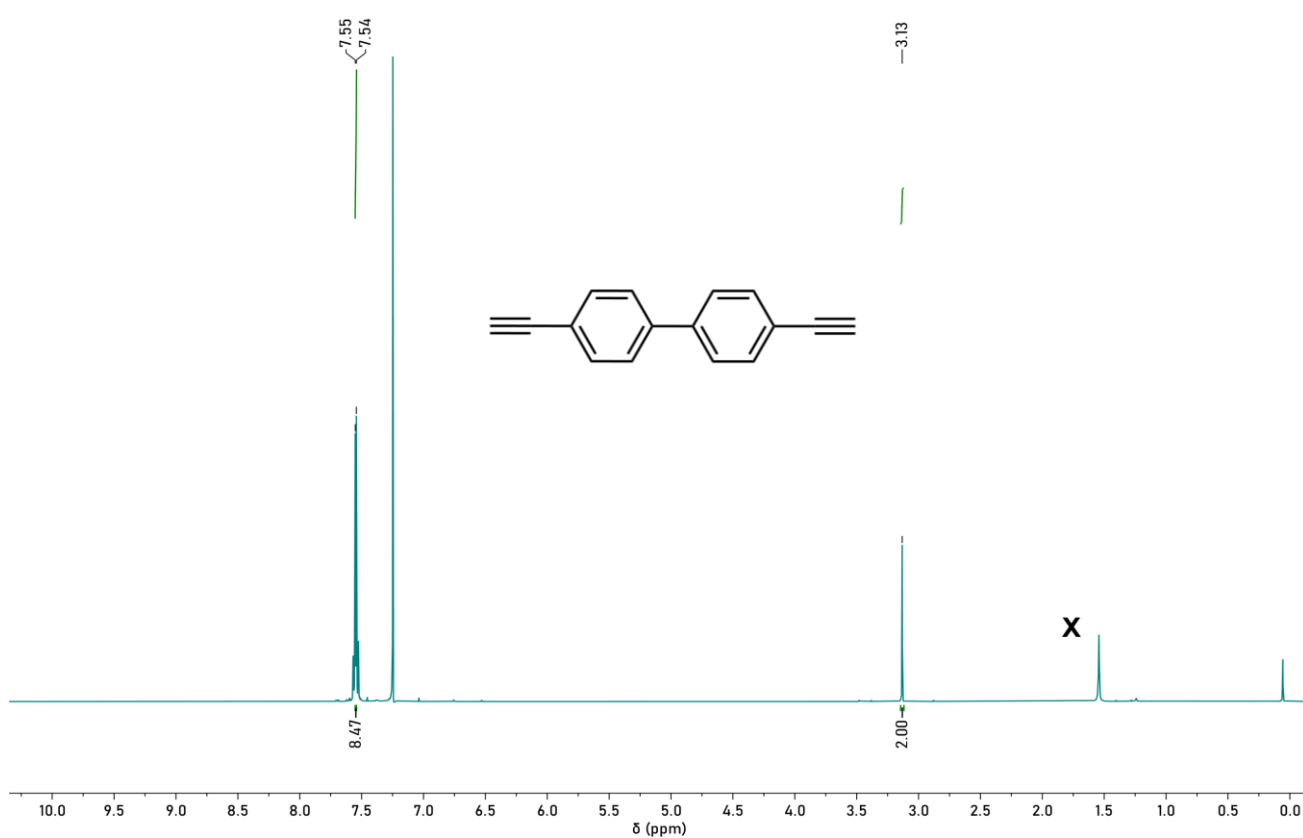

Figure S5.48.  $^1\text{H NMR}$  spectrum of **5b** ( $n=2$ ) in  $\text{CDCl}_3$  [ $x = \text{H}_2\text{O}$ ]

## 6. References

- [1] M. J. et al. Frisch, *Gaussian 16 Rev. C.01*; Wallingford, CT, n.d.
- [2] T. Yanai, D. P. Tew, N. C. Handy, *Chem. Phys. Lett.* **2004**, 393, 51–57.
- [3] G. A. Petersson, A. Bennett, T. G. Tensfeldt, M. A. Al-Laham, W. A. Shirley, J. Mantzaris, *J. Chem. Phys.* **1988**, 89, 2193–2218.
- [4] S. N. Sanders, E. Kumarasamy, A. B. Pun, M. T. Trinh, B. Choi, J. Xia, E. J. Taffet, J. Z. Low, J. R. Miller, X. Roy, X.-Y. Zhu, M. L. Steigerwald, M. Y. Sfeir, L. M. Campos, *J. Am. Chem. Soc.* **2015**, 137, 8965–8972.
- [5] K. N. Plunkett, K. Godula, C. Nuckolls, N. Tremblay, A. C. Whalley, S. Xiao, *Org. Lett.* **2009**, 11, 2225–2228.
- [6] N. Vets, M. Smet, W. Dehaen, *Tetrahedron Lett.* **2004**, 45, 7287–7289.
- [7] D. Lehnerr, A. H. Murray, R. McDonald, R. R. Tykwinski, *Angew. Chemie Int. Ed.* **2010**, 49, 6190–6194.
- [8] E. G. Fuenmeler, S. N. Sanders, A. B. Pun, E. Kumarasamy, T. Zeng, K. Miyata, M. L. Steigerwald, X.-Y. Zhu, M. Y. Sfeir, L. M. Campos, N. Ananth, *ACS Cent. Sci.* **2016**, 2, 316–324.
- [9] L. M. Yablon, S. N. Sanders, K. Miyazaki, E. Kumarasamy, G. He, B. Choi, N. Ananth, M. Y. Sfeir, L. M. Campos, *Mater. Horizons* **2022**, 9, 462–470.
